# Supplementary material for: Hypermetabolism in mice carrying a near-complete human chromosome 21
Source: eLife. 2023 May 30;12:e86023. doi: 10.7554/eLife.86023 (PMC10229126; doi:10.7554/eLife.86023)
Supplement: Supplementary file 1. — Eu, euploid; BW, body weight; gWAT, gonadal white adipose tissue; iWAT, inguinal white adipose tissue. [file elife-86023-supp1.xlsx]

## Sheet: Sheet2
Supplemental File 1. Tissue weights of chow-fed Euploid and MAC21 male mice at termination of the study.
	Eu	MAC21	P
N	7	6
BW (g)	47.17 ± 3.73	26.77 ± 3.14	0.0018
gWAT ( g)	1.47 ± 0.29	0.60 ± 0.19	0.04
iWAT (g)	1.15 ± 0.30	0.43 ± 0.20	0.08
Liver (g)	2.42 ± 0.31	1.54 ± 0.18	0.034
Pancreas (g)	0.30 ± 0.02	0.27 ± 0.01	0.109
Kidney (g)	0.19 ± 0.01	0.15 ± 0.02	0.051
Heart (g)	0.16 ± 0.01	0.14 ± 0.01	0.025
Eu: Euploid; BW: body weight; gWAT: gondal white adipose tissue; iWAT: inguinal white adipose tissue
