# Supplementary material for: Hypermetabolism in mice carrying a near-complete human chromosome 21
Source: eLife. 2023 May 30;12:e86023. doi: 10.7554/eLife.86023 (PMC10229126; doi:10.7554/eLife.86023)
Supplement: Supplementary file 2. — Eu, euploid; VO2, rate of oxygen consumption; VCO2, rate of carbon dioxide production; RER, respiratory exchange ratio; EE, energy expenditure. [file elife-86023-supp2.xlsx]

## Sheet: Sheet1
Supplemental File 2. Indirect calorimetry analysis of male (16.5 weeks of age) MAC21 mice and Euploid controls fed a standard chow
	Eu	MAC21	P	Eu	MAC21	P	Eu	MAC21	P
Low-fat chow diet (Male)	Ad-libitum (dark cycle)			Ad-libitum (light cycle)			Ad-libitum (24 hr)
N	8	9		8	9		8	9
Body weight (g)							28.9 ± 1.09	20.6 ± 0.29	<0.001
Food intake (kcal)	9.76 ± 0.65	10.66 ± 0.58	0.32	2.44 ± 0.45	2.67 ± 0.20	0.639	12.2 ± 0.92	13.3 ± 0.56	0.302
VO2 (mL/kg lean mass/h)	4381 ± 180	5674 ± 69	<0.001	3589 ± 123	4616 ± 83	<0.001	3984 ± 151	5145 ± 79	<0.001
VCO2 (mL/kg lean mass/h)	4231 ± 182	5600 ± 97	<0.001	3158 ± 122	4170 ± 109	<0.001	3695 ± 150	4889 ± 81	<0.001
RER (VCO2/VO2)	0.96 ± 0.006	0.99 ± 0.007	0.03	0.88 ± 0.008	0.90 ± 0.010	0.099	0.92 ± 0.006	0.94 ± 0.005	0.011
EE (kcal/kg lean mass/h)	21.9 ± 0.91	28.5 ± 0.49	<0.001	17.6 ± 0.62	22.7 ± 0.45	<0.001	19.8 ± 0.76	25.6 ± 0.40	<0.001
Total activity (beam breaks)	30160 ± 2377	47055 ± 5532	0.017	9639 ± 1589	14530 ± 1107	0.021	39798 ± 3869	61586 ± 6366	0.013
Ambulatory activity (counts)	16577 ± 3138	28148 ± 4020	0.042	4605 ± 1662	7135 ± 778	0.172	21181 ± 4736	35283 ± 4680	0.052
	Fasting (dark cycle)			Fasting (light cycle)			Fasting (24 hr)
Body weight (g)							25.5 ± 1.15	16.6 ± 0.41	<0.001
Food intake (kcal)	0	0		0	0		0	0
VO2 (mL/kg lean mass/h)	3604 ± 118	5151 ± 149	<0.001	2794 ± 60	4099 ± 199	<0.001	3199 ± 83	4675 ± 169	<0.001
VCO2 (mL/kg lean mass/h)	2800 ± 98	4115 ± 106	<0.001	2107 ± 57	3098 ± 161	<0.001	2454 ± 71	3606 ± 129	<0.001
RER (VCO2/VO2)	0.77 ± 0.002	0.78 ± 0.006	0.105	0.75 ± 0.006	0.75 ± 0.008	0.982	0.76 ± 0.003	0.77 ± 0.006	0.492
EE (kcal/kg lean mass/h)	17.2 ± 0.57	25.1 ± 0.69	<0.001	13.3 ± 0.30	19.5 ± 0.95	<0.001	15.2 ± 0.41	22.3 ± 0.80	<0.001
Total activity (beam breaks)	36169 ± 1838	87131 ± 11695	0.001	9221 ± 1546	56436 ± 14366	0.008	45389 ± 3068	143567 ± 25225	0.002
Ambulatory activity (counts)	21867 ± 1863	62399 ± 9337	0.001	4886 ± 1252	42324 ± 11664	0.009	26753 ± 2956	104723 ± 20414	0.003
	Re-feed (dark cycle)			Re-feed (light cycle)			Re-feed (24 hr)
Body weight (g)							27.9 ± 1.03	19.4 ± 0.55	<0.001
Food intake (kcal)	12.9 ± 0.62	13.4 ± 0.36	0.524	3.41 ± 0.37	4.01 ± 0.47	0.337	17.6 ± 1.05	17.3 ± 0.49	0.836
VO2 (mL/kg lean mass/h)	4216 ± 145	4980 ± 184	0.006	3459 ± 154	4356 ± 126	<0.001	3850 ± 147	4678 ± 132	<0.001
VCO2 (mL/kg lean mass/h)	4200 ± 159	4966 ± 179	0.008	3502 ± 186	4431 ± 177	0.003	3873 ± 167	4706 ± 132	0.001
RER (VCO2/VO2)	1.00 ± 0.005	1.00 ± 0.006	0.517	1.01 ± 0.014	1.01 ± 0.020	0.92	1.01 ± 0.009	1.00 ± 0.011	0.921
EE (kcal/kg lean mass/h)	21.3 ± 0.75	25.1 ± 0.92	0.006	17.5 ± 0.81	22.1 ± 0.69	<0.001	19.5 ± 0.76	23.6 ± 0.66	<0.001
Total activity (beam breaks)	49750 ± 4033	65119 ± 5703	0.048	9175 ± 1219	12966 ± 1506	0.073	37102 ± 4356	45853 ± 7582	0.349
Ambulatory activity (counts)	27781 ± 4810	38270 ± 3686	0.099	4326 ± 1186	6693 ± 1045	0.153	19302 ± 4436	26753 ± 5461	0.314
Eu: Euploid; VO2: rate of oxygen consumption; VCO2: rate of carbon dioxide production; RER: respiratory exchange ratio; EE: energy expenditure
