# Supplementary material for: Hypermetabolism in mice carrying a near-complete human chromosome 21
Source: eLife. 2023 May 30;12:e86023. doi: 10.7554/eLife.86023 (PMC10229126; doi:10.7554/eLife.86023)
Supplement: Supplementary file 3. — Eu, euploid; gWAT, gonadal white adipose tissue; iWAT, inguinal white adipose tissue; BAT, brown adipose tissue. [file elife-86023-supp3.xlsx]

## Sheet: Sheet2
Supplemental File 3. Tissue weight of high fat diet-fed male mice (33 weeks of age; fed diet for 16.5 weeks) at termination of the study
	Eu	MAC21	P
N	8	8
Body weight (g)	46.62 ± 2.16	28.16 ± 1.76	<0.001
Gondal fat (gWAT, g)	1.09 ± 0.11	0.64 ± 0.12	0.0157359
Inguinal fat (iWAT, g)	1.02 ± 0.06	0.32 ± 0.08	<0.001
Liver (g)	2.02 ± 0.22	1.39 ± 0.08	0.0179356
Pancreas (g)	0.25 ± 0.03	0.25 ± 0.01	0.933124
Kidney (g)	0.18 ± 0.01	0.15 ± 0.01	0.0263179
Spleen (g)	0.09 ± 0.01	0.09 ± 0.01	0.851122
Diaphragm (g)	0.11 ± 0.01	0.09 ± 0.01	0.00955151
Heart (g)	0.18 ± 0.02	0.16 ± 0.01	0.266178
BAT (g)	0.32 ± 0.04	0.12 ± 0.02	0.000976879
Brain (g)	0.45 ± 0.01	0.48 ± 0.005	0.0043637
Tibia (mm)	18.25 ± 0.21	18.04 ± 0.15	0.421254
Eu: Euploid; gWAT: gondal white adipose tissue; iWAT: inguinal white adipose tissue; BAT: brown adipose tissue
