# Supplementary material for: Hypermetabolism in mice carrying a near-complete human chromosome 21
Source: eLife. 2023 May 30;12:e86023. doi: 10.7554/eLife.86023 (PMC10229126; doi:10.7554/eLife.86023)
Supplement: Supplementary file 4. — RBC, red blood cell count; HGB, hemoglobin; HCT, hematocrit; MCV, mean corpuscular (erythrocyte) volume; MCH, mean corpuscular hemoglobin; MCHC, mean corpuscular hemoglobin concentration; RET, reticulocyte count; PLT, platelet count; WBC, white blood cells count; NEUT, neutrophil count; LYMPH, lymphocyte count; MONO, monocyte count; EO, eosinophil count; BASO, basophil count; Eu, euploid. [file elife-86023-supp4.xlsx]

## Sheet: Sheet1
Supplemental File 4. Complete blood count of Euploid and MAC21 mice fed a high-fat diet (50 weeks of age; on diet for 13 weeks)
	Eu	MAC21	P
N	5	6
RBC (106/μL)	8.66 ± 0.61	9.22 ± 0.26	0.45213
HGB (g/dL)	12.85 ± 1.24	14.02 ± 0.31	0.424453
HCT (%)	41.88 ± 3.59	42.88 ± 1.09	0.81285
MCV (fL)	48.12 ± 1.46	46.56 ± 0.54	0.380555
MCH (pg)	14.72 ± 0.59	15.26 ± 0.16	0.435523
MCHC (g/dL)	30.53 ± 0.58	32.80 ± 0.28	0.00913171
RET (103/μL)	747.12 ± 141.32	412.34 ± 25.07	0.0629668
PLT (103/μL)	722.33 ± 176.68	1230.40 ± 86.03	0.0387964
WBC (103/μL)	9.62 ± 2.41	9.93 ± 0.47	0.901848
NEUT (103/μL)	2.29 ± 0.87	1.55 ± 0.04	0.420623
LYMPH (103/μL)	7.86 ± 2.06	7.95 ± 0.43	0.969111
MONO (103/μL)	0.31 ± 0.13	0.19 ± 0.05	0.37015
EO (103/μL)	0.23 ± 0.10	0.22 ± 0.03	0.984993
BASO (103/μL)	0.01 ± 0.01	0.03 ± 0.01	0.26657
RBC, red blood cell count; HGB hemoglobin; HCT, hematocrit; MCV, mean corpuscular (erythrocyte) volume; MCH, mean corpuscular hemoglobin; MCHC, mean corpuscular hemoglobin concentration; RET, reticulocyte count; PLT, platelet count; WBC, white blood cells count; NEUT, neutrophil count; LYMPH, lymphocyte count; MONO, monocyte count; EO, eosinophil count; BASO, basophil count; Eu, euploid
