# Supplementary material for: Hypermetabolism in mice carrying a near-complete human chromosome 21
Source: eLife. 2023 May 30;12:e86023. doi: 10.7554/eLife.86023 (PMC10229126; doi:10.7554/eLife.86023)
Supplement: Supplementary file 5. — Eu, euploid; VOC, rate of oxygen consumption; VCO2, rate of carbon dioxide production; RER, respiratory exchange ratio; EE, energy expenditure. [file elife-86023-supp5.xlsx]

## Sheet: Sheet1
Supplemental File 5. Indirect calorimetry analysis of male (25 weeks of age) Euploid and MAC21 littermate mice fed a high-fat diet (8.5 weeks on diet)
	Eu	MAC21	P	Eu	MAC21	P	Eu	MAC21	P
High-fat diet (Male)	Ad-libitum (dark cycle)			Ad-libitum (light cycle)			Ad-libitum (24 hr)
N	8	9		8	9		8	9
Body weight (g)							43.0 ± 1.99	25.8 ± 1.06	<0.001
Food intake (kcal)	11.7 ± 1.02	12.6 ± 0.78	0.502	3.6 ± 0.61	3.6 ± 0.34	0.987	15.3 ± 1.20	16.2 ± 0.83	0.556
VO2 (mL/kg lean mass/h)	4871 ± 107	6378 ± 316	<0.001	4046 ± 74	5222 ± 250	<0.001	4459 ± 84	5800 ± 281	<0.001
VCO2 (mL/kg lean mass/h)	3956 ± 88	5316 ± 255	<0.001	3270 ± 65	4274 ± 216	<0.001	3613 ± 68	4795 ± 232	<0.001
RER (VCO2/VO2)	0.81 ± 0.004	0.83 ± 0.003	0.001	0.81 ± 0.004	0.82 ± 0.006	0.244	0.81 ± 0.003	0.83 ± 0.004	0.011
EE (kcal/kg lean mass/h)	23.5 ± 0.51	30.9 ± 1.52	<0.001	19.5 ± 0.36	25.2 ± 1.22	<0.001	21.5 ± 0.40	28.0 ± 1.36	<0.001
Total activity (beam breaks)	22378 ± 1644	41249 ± 4280	0.001	8153 ± 1249	14099 ± 1570	0.011	30531 ± 2553	16508 ± 5503	0.001
Ambulatory activity (counts)	11114 ± 1669	20126 ± 2350	0.008	3571 ± 1295	5798 ± 730	0.144	14685 ± 2859	25924 ± 2898	0.015
	Fasting (dark cycle)			Fasting (light cycle)			Fasting (24 hr)
Body weight (g)							40.3 ± 1.89	23.1 ± 1.06	<0.001
Food intake (kcal)	0	0		0	0		0	0
VO2 (mL/kg lean mass/h)	4389 ± 138	5063 ± 238	0.028	3475 ± 84	3832 ± 176	0.089	3932 ± 108	4447 ± 201	0.04
VCO2 (mL/kg lean mass/h)	3317 ± 101	3887 ± 172	0.013	2650 ± 64	2953 ± 131	0.057	2984 ± 80	3419 ± 146	0.02
RER (VCO2/VO2)	0.76 ± 0.002	0.77 ± 0.007	0.096	0.76 ± 0.003	0.77 ± 0.004	0.149	0.76 ± 0.002	0.77 ± 0.005	0.109
EE (kcal/kg lean mass/h)	20.8 ± 0.65	24.1 ± 1.12	0.024	16.5 ± 0.40	18.3 ± 0.83	0.081	18.7 ± 0.51	21.2 ± 0.94	0.035
Total activity (beam breaks)	25504 ± 3251	47893 ± 5189	0.003	6259 ± 815	14298 ± 1499	<0.001	31763 ± 3793	62191 ± 6644	0.001
Ambulatory activity (counts)	13987 ± 1797	28435 ± 3571	0.003	2381 ± 392	7565 ± 1177	<0.001	16368 ± 1981	36000 ± 4676	0.002
	Re-feed (dark cycle)			Re-feed (light cycle)			Re-feed (24 hr)
Body weight (g)							41.4 ± 1.93	25.5 ± 0.90	<0.001
Food intake (kcal)	12.9 0.62	13.4 ± 0.38	0.524	2.90 ± 0.62	3.6 ± 0.34	0.353	13.0 ± 0.87	17.7 ± 0.82	0.002
VO2 (mL/kg lean mass/h)	4907 ± 133	5707 ± 225	0.008	3981 ± 77	4829 ± 187	<0.001	4459 ± 100	5282 ± 203	0.003
VCO2 (mL/kg lean mass/h)	3916 ± 104	4812 ± 164	<0.001	3233 ± 65	4130 ± 162	<0.001	3586 ± 79	4482 ± 159	<0.001
RER (VCO2/VO2)	0.80 ± 0.005	0.84 ± 0.008	<0.001	0.81 ± 0.004	0.86 ± 0.011	0.002	0.80 ± 0.004	0.85 ± 0.009	<0.001
EE (kcal/kg lean mass/h)	23.5 ± 0.63	27.7 ± 1.06	0.005	19.2 ± 0.37	23.5 ± 0.90	<0.001	21.4 ± 0.48	25.7 ± 0.97	0.001
Total activity (beam breaks)	49750 ± 4033	65119 ± 6049	0.048	5118 ± 712	9820 ± 1222	0.005	27579 ± 2805	46524 ± 5236	0.007
Ambulatory activity (counts)	27781 ± 4810	38270 ± 3910	0.1	1618 ± 186	3424 ± 434	0.002	11970 ± 847	22377 ± 2708	0.003
Eu: Euploid; VO2: rate of oxygen consumption; VCO2: rate of carbon dioxide production; RER: respiratory exchange ratio; EE: energy expenditure
