# Supplementary material for: Hypermetabolism in mice carrying a near-complete human chromosome 21
Source: eLife. 2023 May 30;12:e86023. doi: 10.7554/eLife.86023 (PMC10229126; doi:10.7554/eLife.86023)
Supplement: Supplementary file 6. — Lists include: detected human genes and all significantly up- and downregulated mouse genes. [file elife-86023-supp6.xlsx]

## Sheet: HFD - gWAT - 22C
Supplemental File 6. Differentially expressed genes (DEGs) in gonadal white adipose tissue (High-fat Diet, 22°C)
Human genes expressed							Mouse up-regulated genes							Mouse down-regulated genes
Gene Symbol	Log(Fold Change)	Adj.p-Value	Gene Type	GencodeID	EntrezID		Gene Symbol	Log(Fold Change)	Adj.p-Value	Gene Type	GencodeID	EntrezID		Gene Symbol	Log(Fold Change)	Adj.p-Value	Gene Type	GencodeID	EntrezID
DSCR3	10.736	6.24287e-07	protein_coding	ENSG00000157538.13	10311		Orm3	3.68054	0.0312477	protein_coding	ENSMUSG00000028359.4	18407		Sgcg	-11.7504	0.0227202	protein_coding	ENSMUSG00000035296.13	24053
MCM3AP	10.313	6.24287e-07	protein_coding	ENSG00000160294.10	8888		Zfp970	1.44236	0.0461782	protein_coding	ENSMUSG00000078866.10	628308		Mcpt2	-11.1747	0.0233371	protein_coding	ENSMUSG00000022226.5	17225
TRAPPC10	10.9236	6.24287e-07	protein_coding	ENSG00000160218.12	7109		Chst11	0.985002	0.0488575	protein_coding	ENSMUSG00000034612.7	58250		Igkv19-93	-8.36805	0.0166758	IG_V_gene	ENSMUSG00000098814.2	NA
USP16	10.6122	6.24287e-07	protein_coding	ENSG00000156256.14	10600									Sult4a1	-6.01493	0.00707765	protein_coding	ENSMUSG00000018865.8	29859
PTTG1IP	12.0704	6.24287e-07	protein_coding	ENSG00000183255.11	754									Gm3375	-5.67348	0.0046881	processed_pseudogene	ENSMUSG00000107470.1	NA
PRMT2	11.1449	6.24287e-07	protein_coding	ENSG00000160310.16	3275									Pex5l	-4.85021	0.0134906	protein_coding	ENSMUSG00000027674.16	58869
BRWD1	10.5199	6.24287e-07	protein_coding	ENSG00000185658.13	54014									Cpz	-2.73451	0.0269539	protein_coding	ENSMUSG00000036596.6	242939
IFNGR2	10.2973	6.24287e-07	protein_coding	ENSG00000159128.14	3460									Col6a5	-1.84406	0.0446774	protein_coding	ENSMUSG00000091345.8	665033
PIGP	10.713	6.24287e-07	protein_coding	ENSG00000185808.13	51227
HMGN1	10.5504	6.24287e-07	protein_coding	ENSG00000205581.10	3150
SUMO3	11.291	6.24287e-07	protein_coding	ENSG00000184900.15	6612
C2CD2	11.7037	6.24287e-07	protein_coding	ENSG00000157617.16	25966
TTC3	12.4999	6.24287e-07	protein_coding	ENSG00000182670.13	7267
APP	13.1157	6.24287e-07	protein_coding	ENSG00000142192.20	351
MX2	10.8713	6.24287e-07	protein_coding	ENSG00000183486.12	4600
S100B	13.0195	6.24287e-07	protein_coding	ENSG00000160307.9	6285
HLCS	9.82908	7.69923e-07	protein_coding	ENSG00000159267.14	3141
CRYZL1	9.7232	7.70273e-07	protein_coding	ENSG00000205758.11	9946
BTG3	10.0502	7.70273e-07	protein_coding	ENSG00000154640.14	10950
ATP5J	11.3522	7.70273e-07	protein_coding	ENSG00000154723.12	522
IFNAR1	10.7496	7.70273e-07	protein_coding	ENSG00000142166.12	3454
TSPEAR-AS1	11.1909	7.70273e-07	antisense	ENSG00000235890.2	NA
GABPA	10.3863	7.9305e-07	protein_coding	ENSG00000154727.10	2551
PAXBP1	9.31493	7.9305e-07	protein_coding	ENSG00000159086.14	94104
ATP5O	9.46931	7.9305e-07	protein_coding	ENSG00000241837.6	539
RRP1B	10.0657	8.08168e-07	protein_coding	ENSG00000160208.12	23076
TMEM50B	9.68426	8.08168e-07	protein_coding	ENSG00000142188.16	757
CCT8	11.0705	8.08168e-07	protein_coding	ENSG00000156261.12	10694
PDXK	12.3432	8.08168e-07	protein_coding	ENSG00000160209.18	8566
DYRK1A	10.1825	8.08168e-07	protein_coding	ENSG00000157540.19	1859
BACE2	10.1835	8.08168e-07	protein_coding	ENSG00000182240.15	25825
SLC37A1	9.40281	8.08168e-07	protein_coding	ENSG00000160190.13	54020
TSPEAR-AS2	10.4606	8.08168e-07	antisense	ENSG00000182912.6	NA
SCAF4	9.64945	8.34346e-07	protein_coding	ENSG00000156304.14	57466
RUNX1	9.79918	8.34346e-07	protein_coding	ENSG00000159216.18	861
DIP2A	11.6236	1.05941e-06	protein_coding	ENSG00000160305.17	23181
UBE2G2	10.7616	1.18823e-06	protein_coding	ENSG00000184787.18	7327
CBR1	9.66997	1.22901e-06	protein_coding	ENSG00000159228.12	873
LINC00649	9.7144	1.23563e-06	antisense	ENSG00000237945.7	100506334
SYNJ1	9.76762	1.24519e-06	protein_coding	ENSG00000159082.17	8867
SETD4	8.92619	1.24519e-06	protein_coding	ENSG00000185917.13	54093
NDUFV3	10.4771	1.24519e-06	protein_coding	ENSG00000160194.17	4731
ETS2	9.77626	1.24519e-06	protein_coding	ENSG00000157557.11	2114
SON	12.0247	1.24519e-06	protein_coding	ENSG00000159140.18	6651
RWDD2B	8.94128	1.43463e-06	protein_coding	ENSG00000156253.6	10069
RRP1	10.2036	1.60972e-06	protein_coding	ENSG00000160214.12	8568
WRB	9.77031	1.74549e-06	protein_coding	ENSG00000182093.14	7485
URB1	9.90142	1.75929e-06	protein_coding	ENSG00000142207.6	9875
PSMG1	8.59449	2.00729e-06	protein_coding	ENSG00000183527.11	8624
PKNOX1	8.48377	2.0433e-06	protein_coding	ENSG00000160199.14	5316
PRDM15	8.19506	2.05841e-06	protein_coding	ENSG00000141956.13	63977
ZBTB21	10.3266	2.15103e-06	protein_coding	ENSG00000173276.13	49854
PFKL	9.26538	2.31359e-06	protein_coding	ENSG00000141959.16	5211
HSPA13	10.0885	2.31359e-06	protein_coding	ENSG00000155304.5	6782
IFNAR2	9.47742	2.33451e-06	protein_coding	ENSG00000159110.19	3455
N6AMT1	8.08075	2.49489e-06	protein_coding	ENSG00000156239.11	29104
CYYR1	8.85643	2.49489e-06	protein_coding	ENSG00000166265.11	116159
ADAMTS1	8.42357	2.65934e-06	protein_coding	ENSG00000154734.14	9510
IL10RB	9.62318	2.73633e-06	protein_coding	ENSG00000243646.9	3588
ITSN1	11.0857	2.82908e-06	protein_coding	ENSG00000205726.14	6453
AGPAT3	10.6648	3.98378e-06	protein_coding	ENSG00000160216.18	56894
SH3BGR	9.20441	4.61517e-06	protein_coding	ENSG00000185437.13	6450
SOD1	11.5735	4.79012e-06	protein_coding	ENSG00000142168.14	6647
CLIC6	11.0527	4.80643e-06	protein_coding	ENSG00000159212.12	54102
DONSON	7.82803	5.33027e-06	protein_coding	ENSG00000159147.17	29980
CH507-9B2.5	8.40693	5.52009e-06	protein_coding	ENSG00000275464.4	102724159
ITGB2-AS1	10.4085	5.9171e-06	antisense	ENSG00000227039.6	100505746
ABCG1	8.34315	6.15657e-06	protein_coding	ENSG00000160179.18	9619
MX1	9.87535	9.40484e-06	protein_coding	ENSG00000157601.13	4599
C21orf59	7.62481	9.53494e-06	protein_coding	ENSG00000159079.18	56683
LTN1	8.26393	9.53494e-06	protein_coding	ENSG00000198862.13	26046
AP001065.15	8.01851	9.97334e-06	lincRNA	ENSG00000228709.1	NA
MAP3K7CL	8.75595	1.01226e-05	protein_coding	ENSG00000156265.15	56911
TFF3	8.29169	1.10609e-05	protein_coding	ENSG00000160180.15	7033
MRPL39	8.294	1.12168e-05	protein_coding	ENSG00000154719.13	54148
U2AF1	7.36052	1.14954e-05	protein_coding	ENSG00000160201.11	7307
CSTB	13.4917	1.15405e-05	protein_coding	ENSG00000160213.5	1476
JAM2	8.6133	1.20043e-05	protein_coding	ENSG00000154721.14	58494
TSPEAR	7.98564	1.72779e-05	protein_coding	ENSG00000175894.14	54084
ADARB1	7.52002	1.83912e-05	protein_coding	ENSG00000197381.15	104
MRPS6	9.88328	1.83912e-05	protein_coding	ENSG00000243927.5	64968
LRRC3	8.99237	1.85114e-05	protein_coding	ENSG00000160233.7	81543
AP000235.2	6.95683	2.24931e-05	lincRNA	ENSG00000226983.2	339622
EVA1C	7.4859	2.27933e-05	protein_coding	ENSG00000166979.12	59271
PAXBP1-AS1	7.02528	2.49267e-05	antisense	ENSG00000238197.5	100506215
LINC01547	8.45426	2.49267e-05	lincRNA	ENSG00000183250.11	84536
TRPM2	9.51204	2.51985e-05	protein_coding	ENSG00000142185.16	7226
MIS18A	7.07989	2.58898e-05	protein_coding	ENSG00000159055.3	54069
CXADR	7.87084	2.87843e-05	protein_coding	ENSG00000154639.18	1525
BACH1	10.8564	3.05098e-05	protein_coding	ENSG00000156273.15	571
POFUT2	10.8746	3.21701e-05	protein_coding	ENSG00000186866.16	23275
CH507-9B2.3	7.94977	3.30549e-05	protein_coding	ENSG00000280071.3	102724023
RCAN1	9.19771	3.30549e-05	protein_coding	ENSG00000159200.17	1827
AATBC	8.523	3.53964e-05	antisense	ENSG00000215458.8	284837
AIRE	6.5444	3.59721e-05	protein_coding	ENSG00000160224.16	326
SLC5A3	11.2602	3.73342e-05	protein_coding	ENSG00000198743.6	6526
DNAJC28	6.64202	3.79302e-05	protein_coding	ENSG00000177692.11	54943
C21orf33	8.07456	5.03725e-05	protein_coding	ENSG00000160221.16	8209
CHAF1B	9.76938	5.58157e-05	protein_coding	ENSG00000159259.7	8208
C21orf2	6.81211	5.76812e-05	protein_coding	ENSG00000160226.15	755
ANKRD30BP2	7.08171	5.76812e-05	transcribed_unprocessed_pseudogene	ENSG00000224309.7	NA
KCNJ15	7.4101	5.76812e-05	protein_coding	ENSG00000157551.17	3772
GART	9.41906	5.81878e-05	protein_coding	ENSG00000159131.16	2618
MRAP	6.44591	6.30692e-05	protein_coding	ENSG00000170262.12	56246
PCNT	9.44409	6.56848e-05	protein_coding	ENSG00000160299.16	5116
DSCR8	6.34402	6.63049e-05	protein_coding	ENSG00000198054.11	84677
HUNK	6.50005	7.10647e-05	protein_coding	ENSG00000142149.8	30811
CH507-9B2.9	6.26913	7.83442e-05	protein_coding	ENSG00000280433.1	102724200
LCA5L	6.60937	7.97802e-05	protein_coding	ENSG00000157578.13	150082
LINC01436	6.51126	7.97802e-05	lincRNA	ENSG00000231106.2	NA
WDR4	6.88301	8.44055e-05	protein_coding	ENSG00000160193.11	10785
TRPM2-AS	5.99671	9.22091e-05	antisense	ENSG00000230061.2	NA
URB1-AS1	6.63178	0.00014742	lincRNA	ENSG00000256073.3	84996
AF015262.2	6.59653	0.00014742	lincRNA	ENSG00000234703.1	NA
TIAM1	8.88289	0.000185215	protein_coding	ENSG00000156299.13	7074
HSF2BP	6.05173	0.000200137	protein_coding	ENSG00000160207.8	11077
BX322557.10	6.28784	0.00022056	processed_transcript	ENSG00000215447.7	NA
ITGB2	14.1237	0.000251847	protein_coding	ENSG00000160255.17	3689
FAM207A	8.50802	0.0002656	protein_coding	ENSG00000160256.12	85395
RPL23P2	6.73611	0.000285004	processed_pseudogene	ENSG00000176054.6	NA
UBASH3A	6.51066	0.000355782	protein_coding	ENSG00000160185.14	53347
LINC00205	5.53956	0.000665676	lincRNA	ENSG00000223768.1	NA
LINC01426	6.94621	0.000699932	antisense	ENSG00000234380.1	100506385
DSCR4	5.71679	0.000748157	protein_coding	ENSG00000184029.9	10281
BRWD1-AS2	5.16202	0.000766811	antisense	ENSG00000255568.3	103091865
SAMSN1	11.4357	0.000766811	protein_coding	ENSG00000155307.17	64092
DSTNP1	6.74753	0.00109737	processed_pseudogene	ENSG00000230982.1	NA
CBSL	5.37382	0.00110229	protein_coding	ENSG00000274276.4	102724560
C21orf58	7.6499	0.00118196	protein_coding	ENSG00000160298.17	54058
ANKRD30BP1	7.72043	0.0014282	unprocessed_pseudogene	ENSG00000175302.5	NA
LL21NC02-1C16.2	6.05912	0.00179863	antisense	ENSG00000272825.1	NA
LINC00479	5.07022	0.00324869	lincRNA	ENSG00000236384.7	150135
AF129075.5	5.93101	0.00339584	sense_intronic	ENSG00000231125.2	NA
FAM3B	5.17233	0.00384785	protein_coding	ENSG00000183844.16	54097
C21orf62	4.91139	0.00416979	protein_coding	ENSG00000205929.10	56245
AP001505.10	4.5833	0.00485316	lincRNA	ENSG00000276529.1	NA
TMPRSS3	5.24146	0.00515742	protein_coding	ENSG00000160183.13	64699
CBR3	5.56828	0.0051604	protein_coding	ENSG00000159231.5	874
RSPH1	6.75076	0.00516211	protein_coding	ENSG00000160188.9	89765
AP001628.7	4.74225	0.00612393	lincRNA	ENSG00000233754.2	NA
AP001432.14	5.26332	0.00794832	lincRNA	ENSG00000242553.1	NA
KCNE2	4.57663	0.00848903	protein_coding	ENSG00000159197.3	9992
YBEY	4.81371	0.00874215	protein_coding	ENSG00000182362.13	54059
LINC00112	4.10082	0.00920322	antisense	ENSG00000232401.1	54089
SNORA81	4.16428	0.0123385	snoRNA	ENSG00000238390.1	NA
AP000266.7	4.42601	0.0128138	antisense	ENSG00000232623.1	NA
AP001052.1	4.09585	0.0130905	pseudogene	ENSG00000281420.1	NA
AP001627.1	4.1369	0.0151116	antisense	ENSG00000225731.1	NA
ZNF295-AS1	4.23208	0.0239028	lincRNA	ENSG00000237232.7	150142
POTED	4.38644	0.0239028	protein_coding	ENSG00000166351.10	317754
AP000254.8	4.07972	0.0302936	antisense	ENSG00000273271.1	NA
KB-68A7.2	4.12597	0.0362573	lincRNA	ENSG00000277352.1	NA
LINC00189	5.50517	0.0386643	sense_overlapping	ENSG00000215533.8	193629
AP001625.4	4.14591	0.0405799	sense_intronic	ENSG00000239930.2	101930094
