# Supplementary material for: Hypermetabolism in mice carrying a near-complete human chromosome 21
Source: eLife. 2023 May 30;12:e86023. doi: 10.7554/eLife.86023 (PMC10229126; doi:10.7554/eLife.86023)
Supplement: Supplementary file 7. — Lists include: detected human genes and all significantly up- and downregulated mouse genes. [file elife-86023-supp7.xlsx]

## Sheet: HFD - iWAT - 22C
Supplemental File 7. Differentially expressed genes (DEGs) in Inguinal white adipose tissue (High-fat diet, 22°C)
Human genes expressed							Mouse up-regulated genes							Mouse down-regulated genes
Gene Symbol	Log(Fold Change)	Adj.p-Value	Gene Type	GencodeID	EntrezID		Gene Symbol	Log(Fold Change)	Adj.p-Value	Gene Type	GencodeID	EntrezID		Gene Symbol	Log(Fold Change)	Adj.p-Value	Gene Type	GencodeID	EntrezID
ATP5O	12.0181	0.0135698	protein_coding	ENSG00000241837.6	539		NONE							Krt5	-19.1885	0.0464534	protein_coding	ENSMUSG00000061527.6	110308
NDUFV3	11.8083	0.020651	protein_coding	ENSG00000160194.17	4731									Dsp	-16.9453	0.0138116	protein_coding	ENSMUSG00000054889.9	109620
AGPAT3	11.4952	0.0025337	protein_coding	ENSG00000160216.18	56894									Ano9	-11.9712	0.0268054	protein_coding	ENSMUSG00000054662.8	71345
ATP5J	11.471	0.020651	protein_coding	ENSG00000154723.12	522									Rarres1	-6.34793	0.0303372	protein_coding	ENSMUSG00000049404.7	109222
S100B	11.444	0.0215963	protein_coding	ENSG00000160307.9	6285									Tmem132b	-5.92531	0.0138116	protein_coding	ENSMUSG00000070498.3	208151
TRAPPC10	11.0825	0.0025337	protein_coding	ENSG00000160218.12	7109									Grid1	-4.89464	0.0176612	protein_coding	ENSMUSG00000041078.6	14803
UBE2G2	10.5291	0.0147691	protein_coding	ENSG00000184787.18	7327
RRP1	10.351	0.0138116	protein_coding	ENSG00000160214.12	8568
MCM3AP	10.3271	0.0138116	protein_coding	ENSG00000160294.10	8888
HMGN1	10.2826	0.0236977	protein_coding	ENSG00000205581.10	3150
IL10RB	10.0555	0.0166315	protein_coding	ENSG00000243646.9	3588
GABPA	9.82057	0.0174402	protein_coding	ENSG00000154727.10	2551
PAXBP1	9.79814	0.0138116	protein_coding	ENSG00000159086.14	94104
CBR1	9.77316	0.0138116	protein_coding	ENSG00000159228.12	873
HLCS	9.40392	0.00704639	protein_coding	ENSG00000159267.14	3141
CRYZL1	9.09956	0.0135698	protein_coding	ENSG00000205758.11	9946
USP16	9.09403	0.0371478	protein_coding	ENSG00000156256.14	10600
URB1	9.06731	0.0176612	protein_coding	ENSG00000142207.6	9875
BRWD1	8.77925	0.0166315	protein_coding	ENSG00000185658.13	54014
CH507-9B2.5	8.59777	0.0138116	protein_coding	ENSG00000275464.4	102724159
SH3BGR	8.48497	0.0176612	protein_coding	ENSG00000185437.13	6450
LRRC3	8.25435	0.0295665	protein_coding	ENSG00000160233.7	81543
SETD4	8.17154	0.0166315	protein_coding	ENSG00000185917.13	54093
PSMG1	8.05915	0.0138116	protein_coding	ENSG00000183527.11	8624
PKNOX1	8.00761	0.0379639	protein_coding	ENSG00000160199.14	5316
MRPL39	7.72471	0.0172566	protein_coding	ENSG00000154719.13	54148
ADARB1	7.27188	0.0341907	protein_coding	ENSG00000197381.15	104
