# Supplementary material for: Hypermetabolism in mice carrying a near-complete human chromosome 21
Source: eLife. 2023 May 30;12:e86023. doi: 10.7554/eLife.86023 (PMC10229126; doi:10.7554/eLife.86023)
Supplement: Supplementary file 8. — Lists include: detected human genes and all significantly up- and downregulated mouse genes. [file elife-86023-supp8.xlsx]

## Sheet: HFD - Liver - 22C
Supplemental File 8. Differentially expressed genes (DEGs) in liver (High-fat diet, 22°C)
Human genes expressed							Mouse up-regulated genes							Mouse down-regulated genes
Gene Symbol	Log(Fold Change)	Adj.p-Value	Gene Type	GencodeID	EntrezID		Gene Symbol	Log(Fold Change)	Adj.p-Value	Gene Type	GencodeID	EntrezID		Gene Symbol	Log(Fold Change)	Adj.p-Value	Gene Type	GencodeID	EntrezID
SOD1	12.7784	7.85489e-07	protein_coding	ENSG00000142168.14	6647		Mirg	8.39558	0.0162386	lincRNA	ENSMUSG00000097391.8	NA		Acot3	-2.9393	0.0374231	protein_coding	ENSMUSG00000021228.14	171281
MX1	11.5222	2.60975e-05	protein_coding	ENSG00000157601.13	4599		Lrtm2	7.46383	0.0217671	protein_coding	ENSMUSG00000055003.14	211187		Gm42796	-2.77118	0.0368402	TEC	ENSMUSG00000105192.1	NA
APP	11.4755	7.85489e-07	protein_coding	ENSG00000142192.20	351		Ehf	7.0282	0.0173512	protein_coding	ENSMUSG00000012350.15	13661		Crym	-2.33783	0.0299333	protein_coding	ENSMUSG00000030905.5	12971
PDXK	11.1291	5.30738e-06	protein_coding	ENSG00000160209.18	8566		Rab25	5.71323	0.000886567	protein_coding	ENSMUSG00000008601.12	53868		Tmem256	-1.5818	0.0200471	protein_coding	ENSMUSG00000070394.10	69186
PTTG1IP	10.8009	9.91312e-07	protein_coding	ENSG00000183255.11	754		BC067074	5.65551	0.0149468	protein_coding	ENSMUSG00000021763.16	408066		Impg2	-1.3889	0.0368402	protein_coding	ENSMUSG00000035270.15	224224
SON	10.7568	7.22797e-06	protein_coding	ENSG00000159140.18	6651		Gm11454	5.17981	0.0495593	lincRNA	ENSMUSG00000086152.1	NA		Hint2	-1.33772	0.0123934	protein_coding	ENSMUSG00000028470.10	68917
CBR1	10.6529	1.44242e-05	protein_coding	ENSG00000159228.12	873		Muc13	5.13227	0.0149468	protein_coding	ENSMUSG00000022824.12	17063		Ttc36	-1.30571	0.0474203	protein_coding	ENSMUSG00000039438.6	192653
ATP5J	10.5895	1.60715e-06	protein_coding	ENSG00000154723.12	522		Ccdc198	5.07743	0.0495593	protein_coding	ENSMUSG00000021850.13	67082		Cox7c	-1.09913	0.0474203	protein_coding	ENSMUSG00000017778.14	12867
AGPAT3	10.5102	4.02422e-05	protein_coding	ENSG00000160216.18	56894		Rasal1	4.95633	0.0368402	protein_coding	ENSMUSG00000029602.11	19415		Slc40a1	-1.04381	0.0474203	protein_coding	ENSMUSG00000025993.10	53945
CSTB	10.14	2.54412e-06	protein_coding	ENSG00000160213.5	1476		Zfp365	4.6493	0.0166011	protein_coding	ENSMUSG00000037855.15	216049
POFUT2	10.1385	1.47064e-05	protein_coding	ENSG00000186866.16	23275		Tubb4a	4.58053	0.00900804	protein_coding	ENSMUSG00000062591.5	22153
DSCR3	10.1094	1.07124e-06	protein_coding	ENSG00000157538.13	10311		Ncam1	4.15419	0.0371806	protein_coding	ENSMUSG00000039542.15	17967
PRMT2	10.0767	4.16811e-06	protein_coding	ENSG00000160310.16	3275		Dpf1	3.96778	0.00900298	protein_coding	ENSMUSG00000030584.14	29861
UBE2G2	10.0594	2.16406e-06	protein_coding	ENSG00000184787.18	7327		Oip5	3.89249	0.0490078	protein_coding	ENSMUSG00000072980.3	70645
DIP2A	10.0041	5.84361e-05	protein_coding	ENSG00000160305.17	23181		Bhlha15	3.8593	0.0409126	protein_coding	ENSMUSG00000052271.7	17341
NDUFV3	9.91823	6.06763e-06	protein_coding	ENSG00000160194.17	4731		Cxcl14	3.45256	0.0267774	protein_coding	ENSMUSG00000021508.10	57266
SUMO3	9.88159	1.94862e-06	protein_coding	ENSG00000184900.15	6612		Nucb2	3.41321	0.0162386	protein_coding	ENSMUSG00000030659.14	53322
BACH1	9.83342	2.53235e-05	protein_coding	ENSG00000156273.15	571		Zfp641	3.05999	0.0495593	protein_coding	ENSMUSG00000022987.11	239652
TRAPPC10	9.82523	2.54412e-06	protein_coding	ENSG00000160218.12	7109		Catsperd	2.94533	0.0422281	protein_coding	ENSMUSG00000040828.9	106757
WRB	9.82443	1.25222e-06	protein_coding	ENSG00000182093.14	7485		Tnfrsf23	2.69258	0.0329525	protein_coding	ENSMUSG00000037613.16	79201
HMGN1	9.78504	7.00025e-06	protein_coding	ENSG00000205581.10	3150		Oas2	2.64655	0.0474203	protein_coding	ENSMUSG00000032690.16	246728
CCT8	9.77434	2.16406e-06	protein_coding	ENSG00000156261.12	10694		Cttnbp2nl	1.75167	0.0384683	protein_coding	ENSMUSG00000062127.11	80281
ETS2	9.74245	0.000269341	protein_coding	ENSG00000157557.11	2114		Dusp10	1.73643	0.0215215	protein_coding	ENSMUSG00000039384.8	63953
C21orf91	9.73308	2.35527e-05	protein_coding	ENSG00000154642.10	54149		Fat1	1.51717	0.0470918	protein_coding	ENSMUSG00000070047.13	14107
CBS	9.72781	2.86785e-06	protein_coding	ENSG00000160200.17	875		Alcam	0.92125	0.0368402	protein_coding	ENSMUSG00000022636.13	11658
BRWD1	9.66135	1.44242e-05	protein_coding	ENSG00000185658.13	54014
IFNAR1	9.65317	6.01022e-06	protein_coding	ENSG00000142166.12	3454
TTC3	9.52761	1.15445e-05	protein_coding	ENSG00000182670.13	7267
GART	9.46113	2.54412e-06	protein_coding	ENSG00000159131.16	2618
AATBC	9.45775	0.000692602	antisense	ENSG00000215458.8	284837
DYRK1A	9.40432	2.16406e-06	protein_coding	ENSG00000157540.19	1859
ITGB2	9.37813	0.000173922	protein_coding	ENSG00000160255.17	3689
USP16	9.25709	9.28867e-06	protein_coding	ENSG00000156256.14	10600
PFKL	9.19682	2.53621e-05	protein_coding	ENSG00000141959.16	5211
CXADR	9.07301	2.16406e-06	protein_coding	ENSG00000154639.18	1525
MCM3AP	9.00623	2.16406e-06	protein_coding	ENSG00000160294.10	8888
ITSN1	8.98027	2.16406e-06	protein_coding	ENSG00000205726.14	6453
GABPA	8.8941	7.99404e-06	protein_coding	ENSG00000154727.10	2551
PIGP	8.86271	2.16406e-06	protein_coding	ENSG00000185808.13	51227
SCAF4	8.85122	0.000241392	protein_coding	ENSG00000156304.14	57466
TMEM50B	8.84799	3.94084e-06	protein_coding	ENSG00000142188.16	757
RRP1	8.84259	1.34096e-05	protein_coding	ENSG00000160214.12	8568
RRP1B	8.79967	2.27189e-05	protein_coding	ENSG00000160208.12	23076
HLCS	8.74957	0.000352991	protein_coding	ENSG00000159267.14	3141
LRRC3	8.71844	0.00262703	protein_coding	ENSG00000160233.7	81543
TSPEAR-AS2	8.71463	9.96549e-06	antisense	ENSG00000182912.6	NA
URB1	8.69662	2.54412e-06	protein_coding	ENSG00000142207.6	9875
BACE2	8.63845	1.47064e-05	protein_coding	ENSG00000182240.15	25825
RCAN1	8.59647	4.02422e-05	protein_coding	ENSG00000159200.17	1827
TSPEAR-AS1	8.59242	6.06763e-06	antisense	ENSG00000235890.2	NA
IFNGR2	8.56543	2.35527e-05	protein_coding	ENSG00000159128.14	3460
MX2	8.5439	0.000177318	protein_coding	ENSG00000183486.12	4600
ATP5O	8.45998	9.28867e-06	protein_coding	ENSG00000241837.6	539
TMPRSS2	8.39617	1.47064e-05	protein_coding	ENSG00000184012.11	7113
RUNX1	8.35988	2.64225e-05	protein_coding	ENSG00000159216.18	861
TMPRSS3	8.30914	0.0017112	protein_coding	ENSG00000160183.13	64699
SETD4	8.30577	3.79979e-06	protein_coding	ENSG00000185917.13	54093
PSMG1	8.30521	3.68692e-06	protein_coding	ENSG00000183527.11	8624
RIPK4	8.30288	7.72286e-05	protein_coding	ENSG00000183421.11	54101
CH507-9B2.3	8.18882	1.47064e-05	protein_coding	ENSG00000280071.3	102724023
CLIC6	8.18186	0.00320213	protein_coding	ENSG00000159212.12	54102
RWDD2B	8.13386	9.28867e-06	protein_coding	ENSG00000156253.6	10069
PRDM15	8.12176	3.94084e-06	protein_coding	ENSG00000141956.13	63977
IFNAR2	8.06761	4.98379e-05	protein_coding	ENSG00000159110.19	3455
SLC37A1	8.06502	1.47064e-05	protein_coding	ENSG00000160190.13	54020
SLC5A3	8.04613	0.000240862	protein_coding	ENSG00000198743.6	6526
PAXBP1	8.01048	8.77621e-06	protein_coding	ENSG00000159086.14	94104
SYNJ1	7.99165	1.44242e-05	protein_coding	ENSG00000159082.17	8867
FAM207A	7.98752	6.53188e-05	protein_coding	ENSG00000160256.12	85395
CRYZL1	7.94338	7.22797e-06	protein_coding	ENSG00000205758.11	9946
C2CD2	7.9212	1.27446e-05	protein_coding	ENSG00000157617.16	25966
IL10RB	7.87182	8.65121e-06	protein_coding	ENSG00000243646.9	3588
BTG3	7.82384	7.72286e-05	protein_coding	ENSG00000154640.14	10950
SH3BGR	7.74631	6.06763e-06	protein_coding	ENSG00000185437.13	6450
DONSON	7.70563	7.80315e-05	protein_coding	ENSG00000159147.17	29980
TRPM2	7.69939	1.44242e-05	protein_coding	ENSG00000142185.16	7226
ZBTB21	7.64652	2.23191e-05	protein_coding	ENSG00000173276.13	49854
CBSL	7.524	0.00271498	protein_coding	ENSG00000274276.4	102724560
MRPL39	7.51589	7.29612e-05	protein_coding	ENSG00000154719.13	54148
LINC00649	7.45914	7.29612e-05	antisense	ENSG00000237945.7	100506334
HSPA13	7.41989	0.000153257	protein_coding	ENSG00000155304.5	6782
PCNT	7.36456	3.29903e-05	protein_coding	ENSG00000160299.16	5116
HUNK	7.36184	3.26606e-05	protein_coding	ENSG00000142149.8	30811
N6AMT1	7.34775	7.29612e-05	protein_coding	ENSG00000156239.11	29104
CH507-9B2.5	7.30736	6.85916e-05	protein_coding	ENSG00000275464.4	102724159
MAP3K7CL	7.27621	0.000173922	protein_coding	ENSG00000156265.15	56911
CLDN14	7.15335	0.00295354	protein_coding	ENSG00000159261.10	23562
PKNOX1	7.14364	1.76414e-05	protein_coding	ENSG00000160199.14	5316
C21orf33	7.11981	7.29612e-05	protein_coding	ENSG00000160221.16	8209
SAMSN1	7.00768	0.0137137	protein_coding	ENSG00000155307.17	64092
AP001065.15	6.92762	0.00015921	lincRNA	ENSG00000228709.1	NA
WDR4	6.8878	0.000269341	protein_coding	ENSG00000160193.11	10785
MRPS6	6.87161	0.000312584	protein_coding	ENSG00000243927.5	64968
C21orf58	6.85546	6.53188e-05	protein_coding	ENSG00000160298.17	54058
S100B	6.80163	0.00900804	protein_coding	ENSG00000160307.9	6285
LINC00479	6.77814	0.046017	lincRNA	ENSG00000236384.7	150135
ITGB2-AS1	6.7302	0.00108821	antisense	ENSG00000227039.6	100505746
YBEY	6.53998	0.000110197	protein_coding	ENSG00000182362.13	54059
MIS18A	6.43576	0.0004115	protein_coding	ENSG00000159055.3	54069
URB1-AS1	6.40714	0.00262703	lincRNA	ENSG00000256073.3	84996
DNAJC28	6.35936	0.000174015	protein_coding	ENSG00000177692.11	54943
LTN1	6.21977	0.000269929	protein_coding	ENSG00000198862.13	26046
C21orf59	6.20919	0.00013313	protein_coding	ENSG00000159079.18	56683
TSPEAR	6.05966	0.0191472	protein_coding	ENSG00000175894.14	54084
TRPM2-AS	5.96268	0.00127164	antisense	ENSG00000230061.2	NA
DSCR8	5.9546	0.000241392	protein_coding	ENSG00000198054.11	84677
U2AF1	5.92571	0.00227185	protein_coding	ENSG00000160201.11	7307
TFF3	5.90994	0.00404884	protein_coding	ENSG00000160180.15	7033
DSCR4	5.80264	0.00113332	protein_coding	ENSG00000184029.9	10281
CYYR1	5.80241	0.000462477	protein_coding	ENSG00000166265.11	116159
JAM2	5.49205	0.0096678	protein_coding	ENSG00000154721.14	58494
ADARB1	5.47163	0.000466012	protein_coding	ENSG00000197381.15	104
LINC01426	5.44419	0.0299333	antisense	ENSG00000234380.1	100506385
LCA5L	5.43735	0.00695612	protein_coding	ENSG00000157578.13	150082
RPL23P2	5.33719	0.00175224	processed_pseudogene	ENSG00000176054.6	NA
KCNJ15	5.25644	0.0495593	protein_coding	ENSG00000157551.17	3772
SSR4P1	5.23883	0.00112322	transcribed_processed_pseudogene	ENSG00000235374.2	728039
LINC01547	5.08183	0.00113332	lincRNA	ENSG00000183250.11	84536
C21orf91-OT1	5.07091	0.00169727	lincRNA	ENSG00000240770.5	246312
RPL39P40	5.06648	0.00271498	processed_pseudogene	ENSG00000226580.1	NA
ANKRD30BP2	4.97055	0.0156018	transcribed_unprocessed_pseudogene	ENSG00000224309.7	NA
BRWD1-AS2	4.90261	0.0104803	antisense	ENSG00000255568.3	103091865
CHAF1B	4.74777	0.0497897	protein_coding	ENSG00000159259.7	8208
TIAM1	4.71857	0.00316501	protein_coding	ENSG00000156299.13	7074
LINC00189	4.70498	0.0334181	sense_overlapping	ENSG00000215533.8	193629
C21orf2	4.70387	0.00570367	protein_coding	ENSG00000160226.15	755
ABCG1	4.60071	0.0119584	protein_coding	ENSG00000160179.18	9619
DSTNP1	4.28676	0.0180573	processed_pseudogene	ENSG00000230982.1	NA
PAXBP1-AS1	4.21042	0.0175132	antisense	ENSG00000238197.5	100506215
LINC00205	4.1634	0.00845783	lincRNA	ENSG00000223768.1	NA
CH507-9B2.1	4.01448	0.0162325	protein_coding	ENSG00000277117.4	102723996
AP000302.58	3.73012	0.0408575	antisense	ENSG00000231355.1	NA
LINC01436	3.68842	0.0435391	lincRNA	ENSG00000231106.2	NA
SNORA81	3.64419	0.0438554	snoRNA	ENSG00000238390.1	NA
