# Supplementary material for: Hypermetabolism in mice carrying a near-complete human chromosome 21
Source: eLife. 2023 May 30;12:e86023. doi: 10.7554/eLife.86023 (PMC10229126; doi:10.7554/eLife.86023)
Supplement: Supplementary file 9. — Lists include: detected human genes and all significantly up- and downregulated mouse genes. [file elife-86023-supp9.xlsx]

## Sheet: HFD - BAT - 22C
Supplemental File 9. Differentially expressed genes (DEGs) in brown adipose tissue (high-fat diet, 22°C)
Human genes expressed							Mouse up-regulated genes							Mouse down-regulated genes
Gene Symbol	Log(Fold Change)	Adj.p-Value	Gene Type	GencodeID	EntrezID		Gene Symbol	Log(Fold Change)	Adj.p-Value	Gene Type	GencodeID	EntrezID		Gene Symbol	Log(Fold Change)	Adj.p-Value	Gene Type	GencodeID	EntrezID
PDXK	11.1442	4.20374e-05	protein_coding	ENSG00000160209.18	8566		Tceal7	8.25445	0.00711309	protein_coding	ENSMUSG00000079428.8	100040972		Cyp4a12a	-3.99583	0.0370511	protein_coding	ENSMUSG00000066071.6	277753
AATBC	10.7733	4.20374e-05	antisense	ENSG00000215458.8	284837		Mybph	6.91342	0.0284414	protein_coding	ENSMUSG00000042451.12	53311		Cyp2a4	-3.86797	0.017995	protein_coding	ENSMUSG00000074254.4	13086
SLC5A3	10.1682	2.11867e-06	protein_coding	ENSG00000198743.6	6526		2310020H05Rik	5.38911	0.03006	lincRNA	ENSMUSG00000100410.1	NA		C8b	-3.85665	0.0451964	protein_coding	ENSMUSG00000029656.13	110382
NDUFV3	10.1649	4.05787e-05	protein_coding	ENSG00000160194.17	4731		Gm13943	3.9462	0.0482514	lincRNA	ENSMUSG00000085277.1	NA		Lect2	-3.80484	0.0471559	protein_coding	ENSMUSG00000021539.8	16841
ATP5O	10.0134	6.31294e-05	protein_coding	ENSG00000241837.6	539		Tmem232	3.77057	0.0125634	protein_coding	ENSMUSG00000045036.14	381107		Mmp12	-2.75979	0.0151871	protein_coding	ENSMUSG00000049723.14	17381
CLIC6	9.8944	3.42001e-06	protein_coding	ENSG00000159212.12	54102		Emx2os	3.50566	0.0145135	antisense	ENSMUSG00000087095.2	NA		Sec1	-2.75113	0.0315049	protein_coding	ENSMUSG00000040364.8	56546
ATP5J	9.85065	0.00014161	protein_coding	ENSG00000154723.12	522		Srpk3	2.82829	0.0216965	protein_coding	ENSMUSG00000002007.5	56504		Tmem178	-2.566	0.0173252	protein_coding	ENSMUSG00000024245.4	68027
CSTB	9.82488	1.94017e-05	protein_coding	ENSG00000160213.5	1476		Aldh1l2	2.73053	0.0444523	protein_coding	ENSMUSG00000020256.14	216188		Ass1	-2.44612	0.0269433	protein_coding	ENSMUSG00000076441.9	11898
S100B	9.75763	6.31294e-05	protein_coding	ENSG00000160307.9	6285		Klf12	2.54214	0.00586053	protein_coding	ENSMUSG00000072294.4	16597		Gm5424	-2.28862	0.00901965	protein_coding	ENSMUSG00000046687.5	NA
SH3BGR	9.70848	0.000107724	protein_coding	ENSG00000185437.13	6450		Hist1h3e	2.45354	0.0214395	protein_coding	ENSMUSG00000069273.2	319151		Fmn1	-1.59782	0.0127936	protein_coding	ENSMUSG00000044042.18	14260
ANKRD20A11P	9.60691	2.48523e-05	transcribed_unprocessed_pseudogene	ENSG00000215559.8	391267		Hoxa9	1.89494	0.0322044	protein_coding	ENSMUSG00000038227.15	15405		Epha2	-1.584	0.00472361	protein_coding	ENSMUSG00000006445.3	13836
PTTG1IP	9.60152	7.18093e-06	protein_coding	ENSG00000183255.11	754		Tpd52l1	1.5093	0.0267117	protein_coding	ENSMUSG00000000296.7	21987		Gpnmb	-1.51712	0.00963026	protein_coding	ENSMUSG00000029816.10	93695
CCT8	9.54738	4.09274e-05	protein_coding	ENSG00000156261.12	10694		Nudt5	0.821418	0.00919594	protein_coding	ENSMUSG00000025817.12	53893		Maneal	-1.49688	0.0322044	protein_coding	ENSMUSG00000042763.9	215090
DSCR3	9.54407	1.97906e-06	protein_coding	ENSG00000157538.13	10311		Cdc123	0.778648	0.00885009	protein_coding	ENSMUSG00000039128.13	98828		Ccdc85a	-1.27405	0.00874756	protein_coding	ENSMUSG00000032878.16	216613
C2CD2	9.53259	1.85626e-06	protein_coding	ENSG00000157617.16	25966		Stim1	0.624242	0.0332285	protein_coding	ENSMUSG00000030987.5	20866		Pde9a	-1.25899	0.00850168	protein_coding	ENSMUSG00000041119.11	18585
WRB	9.4361	8.10787e-05	protein_coding	ENSG00000182093.14	7485		Rps27rt	0.527618	0.0316996	protein_coding	ENSMUSG00000050621.6	100043813		Dnm3	-1.1901	0.023177	protein_coding	ENSMUSG00000040265.16	103967
CH507-9B2.3	9.36214	7.56375e-05	protein_coding	ENSG00000280071.3	102724023		Abcb7	0.513903	0.02582	protein_coding	ENSMUSG00000031333.7	11306		Dll1	-1.13401	0.0313635	protein_coding	ENSMUSG00000014773.13	13388
POFUT2	9.2106	0.000598609	protein_coding	ENSG00000186866.16	23275		Rnf34	0.496418	0.0496831	protein_coding	ENSMUSG00000029474.7	80751		N4bp3	-1.10066	0.0173252	protein_coding	ENSMUSG00000001053.15	212706
ITGB2	9.07071	1.19948e-05	protein_coding	ENSG00000160255.17	3689		Sgcb	0.477328	0.0368993	protein_coding	ENSMUSG00000029156.11	24051		Dach1	-1.08831	0.0236068	protein_coding	ENSMUSG00000055639.16	13134
TRAPPC10	9.04065	3.04549e-05	protein_coding	ENSG00000160218.12	7109									Snai2	-1.06633	0.0108237	protein_coding	ENSMUSG00000022676.6	20583
CYP4F29P	8.925	1.95222e-05	transcribed_unprocessed_pseudogene	ENSG00000228314.1	54055									Prrg3	-1.04938	0.0248397	protein_coding	ENSMUSG00000033361.13	208748
USP16	8.86836	4.20374e-05	protein_coding	ENSG00000156256.14	10600									Dock9	-1.03985	0.0461605	protein_coding	ENSMUSG00000025558.16	105445
MCM3AP	8.79179	1.3197e-05	protein_coding	ENSG00000160294.10	8888									Gm12922	-1.02767	0.0264796	processed_pseudogene	ENSMUSG00000081170.1	NA
PRMT2	8.77493	5.88793e-05	protein_coding	ENSG00000160310.16	3275									Cd200	-0.978684	0.0322044	protein_coding	ENSMUSG00000022661.14	17470
UBE2G2	8.75507	0.000618817	protein_coding	ENSG00000184787.18	7327									Tanc1	-0.971204	0.0216965	protein_coding	ENSMUSG00000035168.16	66860
MX2	8.73938	2.72584e-05	protein_coding	ENSG00000183486.12	4600									Fmnl1	-0.971122	0.0305411	protein_coding	ENSMUSG00000055805.14	57778
DIP2A	8.6911	7.87793e-05	protein_coding	ENSG00000160305.17	23181									Me2	-0.941149	0.00369855	protein_coding	ENSMUSG00000024556.3	107029
PIGP	8.66758	2.48523e-05	protein_coding	ENSG00000185808.13	51227									Boc	-0.928103	0.0408544	protein_coding	ENSMUSG00000022687.11	117606
SON	8.66384	0.00036929	protein_coding	ENSG00000159140.18	6651									Klf6	-0.90819	0.0326879	protein_coding	ENSMUSG00000000078.6	23849
GART	8.64342	4.09274e-05	protein_coding	ENSG00000159131.16	2618									Pcdh12	-0.868438	0.0269433	protein_coding	ENSMUSG00000024440.12	53601
C21orf33	8.63392	0.000724374	protein_coding	ENSG00000160221.16	8209									Jun	-0.838467	0.0195051	protein_coding	ENSMUSG00000052684.4	16476
URB1	8.59696	6.82645e-05	protein_coding	ENSG00000142207.6	9875									Lmo2	-0.810195	0.0426978	protein_coding	ENSMUSG00000032698.15	16909
BRWD1	8.56144	0.00035754	protein_coding	ENSG00000185658.13	54014									Stxbp1	-0.750232	0.033555	protein_coding	ENSMUSG00000026797.16	20910
URB1-AS1	8.54305	4.0046e-05	lincRNA	ENSG00000256073.3	84996									Timp3	-0.741908	0.0406972	protein_coding	ENSMUSG00000020044.13	21859
RWDD2B	8.53837	2.11867e-06	protein_coding	ENSG00000156253.6	10069									Myo1b	-0.724503	0.0393708	protein_coding	ENSMUSG00000018417.14	17912
MAP3K7CL	8.52869	0.000184547	protein_coding	ENSG00000156265.15	56911									Sytl4	-0.707831	0.0488617	protein_coding	ENSMUSG00000031255.14	27359
GABPA	8.49087	2.11867e-06	protein_coding	ENSG00000154727.10	2551									Tpst1	-0.692307	0.0233735	protein_coding	ENSMUSG00000034118.15	22021
RRP1B	8.46823	2.72584e-05	protein_coding	ENSG00000160208.12	23076									Sept8	-0.687717	0.035173	protein_coding	ENSMUSG00000018398.18	20362
DYRK1A	8.43841	8.93873e-05	protein_coding	ENSG00000157540.19	1859									1190002N15Rik	-0.67095	0.0169358	protein_coding	ENSMUSG00000045414.7	68861
APP	8.42572	0.000835191	protein_coding	ENSG00000142192.20	351									Slfn5	-0.629004	0.0243898	protein_coding	ENSMUSG00000054404.12	327978
AGPAT3	8.38825	0.000891358	protein_coding	ENSG00000160216.18	56894									Atp8b2	-0.61769	0.0457286	protein_coding	ENSMUSG00000060671.12	54667
HMGN1	8.36049	0.000153217	protein_coding	ENSG00000205581.10	3150									Fam171a1	-0.5851	0.0456604	protein_coding	ENSMUSG00000050530.14	269233
RRP1	8.34739	1.01602e-05	protein_coding	ENSG00000160214.12	8568									Trim12c	-0.574797	0.0243898	protein_coding	ENSMUSG00000057143.15	319236
IFNAR1	8.34608	5.88793e-05	protein_coding	ENSG00000142166.12	3454									Prelp	-0.555674	0.0364004	protein_coding	ENSMUSG00000041577.5	116847
IFNGR2	8.33979	2.11867e-06	protein_coding	ENSG00000159128.14	3460									Dusp7	-0.515796	0.0133021	protein_coding	ENSMUSG00000053716.9	235584
TTC3	8.33813	0.000123696	protein_coding	ENSG00000182670.13	7267									Smarcd2	-0.429375	0.0364004	protein_coding	ENSMUSG00000078619.10	83796
LINC00649	8.29064	3.42001e-06	antisense	ENSG00000237945.7	100506334
BTG3	8.269	2.60617e-05	protein_coding	ENSG00000154640.14	10950
ITSN1	8.2569	6.09026e-05	protein_coding	ENSG00000205726.14	6453
ZBTB21	8.21443	2.58483e-06	protein_coding	ENSG00000173276.13	49854
CH507-9B2.5	8.2024	2.11867e-06	protein_coding	ENSG00000275464.4	102724159
TMEM50B	8.17475	3.04549e-05	protein_coding	ENSG00000142188.16	757
BACE2	8.07544	2.11867e-06	protein_coding	ENSG00000182240.15	25825
MRPL39	8.03219	7.56375e-05	protein_coding	ENSG00000154719.13	54148
HLCS	7.97527	0.000198103	protein_coding	ENSG00000159267.14	3141
CRYZL1	7.89996	0.000193721	protein_coding	ENSG00000205758.11	9946
LTN1	7.89263	2.11867e-06	protein_coding	ENSG00000198862.13	26046
SUMO3	7.88622	0.000240811	protein_coding	ENSG00000184900.15	6612
TSPEAR-AS1	7.86838	5.07892e-05	antisense	ENSG00000235890.2	NA
N6AMT1	7.84934	5.07892e-05	protein_coding	ENSG00000156239.11	29104
MRPS6	7.76434	7.87793e-05	protein_coding	ENSG00000243927.5	64968
CYYR1	7.75209	7.76191e-05	protein_coding	ENSG00000166265.11	116159
TSPEAR-AS2	7.73542	7.50554e-06	antisense	ENSG00000182912.6	NA
CBR1	7.734	0.000799796	protein_coding	ENSG00000159228.12	873
SYNJ1	7.73169	2.11867e-06	protein_coding	ENSG00000159082.17	8867
PFKL	7.49529	0.000799796	protein_coding	ENSG00000141959.16	5211
PCNT	7.48982	3.8117e-05	protein_coding	ENSG00000160299.16	5116
PAXBP1	7.4869	5.95216e-05	protein_coding	ENSG00000159086.14	94104
ETS2	7.47469	0.000198103	protein_coding	ENSG00000157557.11	2114
HSPA13	7.46727	3.42001e-06	protein_coding	ENSG00000155304.5	6782
MX1	7.37231	0.00872431	protein_coding	ENSG00000157601.13	4599
SETD4	7.33508	0.00035754	protein_coding	ENSG00000185917.13	54093
FAM207A	7.22196	4.09274e-05	protein_coding	ENSG00000160256.12	85395
PSMG1	7.21597	3.39677e-05	protein_coding	ENSG00000183527.11	8624
IFNAR2	7.20528	2.11867e-06	protein_coding	ENSG00000159110.19	3455
DNAJC28	7.1729	2.60617e-05	protein_coding	ENSG00000177692.11	54943
JAM2	7.07346	0.0010043	protein_coding	ENSG00000154721.14	58494
SNX18P13	7.00862	3.4018e-05	processed_pseudogene	ENSG00000230965.1	NA
WDR4	6.98395	3.42001e-06	protein_coding	ENSG00000160193.11	10785
ITGB2-AS1	6.98123	3.20564e-05	antisense	ENSG00000227039.6	100505746
PRDM15	6.96566	0.000982746	protein_coding	ENSG00000141956.13	63977
SLC37A1	6.93251	3.34947e-05	protein_coding	ENSG00000160190.13	54020
C21orf58	6.89236	0.000723084	protein_coding	ENSG00000160298.17	54058
PKNOX1	6.86828	2.72584e-05	protein_coding	ENSG00000160199.14	5316
RUNX1	6.86818	0.000301483	protein_coding	ENSG00000159216.18	861
SCAF4	6.86506	0.00137817	protein_coding	ENSG00000156304.14	57466
SOD1	6.82827	0.00464646	protein_coding	ENSG00000142168.14	6647
RHOT1P2	6.80079	2.95301e-05	processed_pseudogene	ENSG00000203616.2	NA
MIS18A	6.75768	0.000135972	protein_coding	ENSG00000159055.3	54069
AP000235.2	6.57978	0.000132966	lincRNA	ENSG00000226983.2	339622
TRPM2	6.57945	7.53091e-05	protein_coding	ENSG00000142185.16	7226
BACH1	6.47205	0.00025904	protein_coding	ENSG00000156273.15	571
BRWD1-AS2	6.39205	3.55642e-05	antisense	ENSG00000255568.3	103091865
DSCR8	6.32257	1.71481e-05	protein_coding	ENSG00000198054.11	84677
TFF3	6.26763	5.88793e-05	protein_coding	ENSG00000160180.15	7033
MRAP	6.25235	0.000377189	protein_coding	ENSG00000170262.12	56246
ADAMTS1	6.25219	3.2152e-05	protein_coding	ENSG00000154734.14	9510
U2AF1	6.23949	8.73404e-05	protein_coding	ENSG00000160201.11	7307
DONSON	6.14008	0.000135972	protein_coding	ENSG00000159147.17	29980
C21orf59	6.07966	1.95222e-05	protein_coding	ENSG00000159079.18	56683
IL10RB	6.03831	0.000123696	protein_coding	ENSG00000243646.9	3588
C21orf2	6.02629	8.93873e-05	protein_coding	ENSG00000160226.15	755
CH507-9B2.9	5.95086	5.88793e-05	protein_coding	ENSG00000280433.1	102724200
ADARB1	5.93662	2.72584e-05	protein_coding	ENSG00000197381.15	104
ANKRD30BP2	5.92854	2.58974e-05	transcribed_unprocessed_pseudogene	ENSG00000224309.7	NA
AP001347.6	5.90399	8.10787e-05	antisense	ENSG00000224905.6	NA
LINC01547	5.87001	9.20258e-05	lincRNA	ENSG00000183250.11	84536
ABCG1	5.76627	3.26225e-05	protein_coding	ENSG00000160179.18	9619
LRRC3	5.75757	0.00124082	protein_coding	ENSG00000160233.7	81543
PAXBP1-AS1	5.72826	0.000559773	antisense	ENSG00000238197.5	100506215
LCA5L	5.6525	4.09274e-05	protein_coding	ENSG00000157578.13	150082
AP001065.15	5.46086	2.60617e-05	lincRNA	ENSG00000228709.1	NA
PPP6R2P1	5.43959	0.017995	unprocessed_pseudogene	ENSG00000233442.2	NA
RPL23P2	5.43031	0.000104002	processed_pseudogene	ENSG00000176054.6	NA
YBEY	5.36963	2.60617e-05	protein_coding	ENSG00000182362.13	54059
SAMSN1	5.27994	0.0010043	protein_coding	ENSG00000155307.17	64092
EVA1C	5.2477	0.000718156	protein_coding	ENSG00000166979.12	59271
LINC00205	5.13736	6.31294e-05	lincRNA	ENSG00000223768.1	NA
FRG2MP	5.13414	6.33296e-05	processed_pseudogene	ENSG00000275170.1	NA
TSPEAR	5.0506	0.000799796	protein_coding	ENSG00000175894.14	54084
ANKRD20A18P	5.03607	0.00735373	unprocessed_pseudogene	ENSG00000249493.1	NA
RCAN1	4.78564	0.00137177	protein_coding	ENSG00000159200.17	1827
AF015262.2	4.76714	0.000105004	lincRNA	ENSG00000234703.1	NA
BX322557.10	4.73726	9.82685e-05	processed_transcript	ENSG00000215447.7	NA
TIAM1	4.70012	0.000970422	protein_coding	ENSG00000156299.13	7074
AP001052.1	4.54181	0.00124082	pseudogene	ENSG00000281420.1	NA
AP001627.1	4.49689	0.00134899	antisense	ENSG00000225731.1	NA
TRPM2-AS	4.45618	0.00266927	antisense	ENSG00000230061.2	NA
AP000266.7	4.35751	0.00483723	antisense	ENSG00000232623.1	NA
DSCR4	4.29506	0.00220948	protein_coding	ENSG00000184029.9	10281
LINC01436	4.18067	0.000357787	lincRNA	ENSG00000231106.2	NA
CHAF1B	4.1388	0.000903099	protein_coding	ENSG00000159259.7	8208
AP001412.1	4.11895	0.00198513	antisense	ENSG00000272948.2	NA
SSR4P1	4.02839	0.00298684	transcribed_processed_pseudogene	ENSG00000235374.2	728039
LINC01426	3.91669	0.000431762	antisense	ENSG00000234380.1	100506385
HUNK	3.8276	0.0162503	protein_coding	ENSG00000142149.8	30811
TFF2	3.80086	0.0121643	protein_coding	ENSG00000160181.8	7032
pRNA	3.77519	0.00353565	misc_RNA	ENSG00000277572.1	NA
HSF2BP	3.69067	0.00198039	protein_coding	ENSG00000160207.8	11077
KCNJ15	3.41533	0.00582805	protein_coding	ENSG00000157551.17	3772
RSPH1	3.23125	0.0213596	protein_coding	ENSG00000160188.9	89765
AP000253.1	2.82122	0.00822364	lincRNA	ENSG00000234509.1	NA
AP001437.1	2.73525	0.0330725	antisense	ENSG00000273210.1	NA
AP000254.8	2.55656	0.0460814	antisense	ENSG00000273271.1	NA
AF129075.5	2.44113	0.0141053	sense_intronic	ENSG00000231125.2	NA
H2AFZP1	2.16584	0.0335904	processed_pseudogene	ENSG00000213440.2	NA
