# Supplementary material for: Hypermetabolism in mice carrying a near-complete human chromosome 21
Source: eLife. 2023 May 30;12:e86023. doi: 10.7554/eLife.86023 (PMC10229126; doi:10.7554/eLife.86023)
Supplement: Supplementary file 10. — Lists include: detected human genes and all significantly up- and downregulated mouse genes. [file elife-86023-supp10.xlsx]

## Sheet: HFD - SkM - 22C
Supplemental File 10. Diffrentially expressed genes (DEGs) in skeletal muscle (High-fat diet, 22°C)							Mouse up-regulated genes							Mouse down-regulated genes
Human genes expressed
Gene Symbol	Log(Fold Change)	Adj.p-Value	Gene Type	GencodeID	EntrezID		Gene Symbol	Log(Fold Change)	Adj.p-Value	Gene Type	GencodeID	EntrezID		Gene Symbol	Log(Fold Change)	Adj.p-Value	Gene Type	GencodeID	EntrezID
BRWD1	11.6724	1.19258e-06	protein_coding	ENSG00000185658.13	54014		mt-Tn	7.34571	0.000560675	Mt_tRNA	ENSMUSG00000064348.1	NA		Themis3	-4.90479	0.0333571	protein_coding	ENSMUSG00000024105.2	74556
SH3BGR	11.3884	3.52378e-06	protein_coding	ENSG00000185437.13	6450		Gm14438	6.07827	0.0154602	processed_pseudogene	ENSMUSG00000084323.4	NA		Calm4	-4.82881	0.0203104	protein_coding	ENSMUSG00000033765.4	80796
MAP3K7CL	11.1147	3.33926e-05	protein_coding	ENSG00000156265.15	56911		Th	5.30682	0.00254652	protein_coding	ENSMUSG00000000214.11	21823		Gm38081	-4.07015	0.00758456	TEC	ENSMUSG00000104363.1	NA
ATP5O	11.11	1.19258e-06	protein_coding	ENSG00000241837.6	539		mt-Ty	4.70806	0.000945146	Mt_tRNA	ENSMUSG00000064350.1	NA		Ly6g6d	-3.72804	0.0163662	protein_coding	ENSMUSG00000073413.9	114654
AGPAT3	11.0535	1.19258e-06	protein_coding	ENSG00000160216.18	56894		Fgf21	4.57982	0.0119953	protein_coding	ENSMUSG00000030827.5	56636		Gm4861	-3.66579	0.0109663	protein_coding	ENSMUSG00000055138.9	229862
SOD1	10.9243	1.19258e-06	protein_coding	ENSG00000142168.14	6647		mt-Atp8	4.40119	0.0204931	protein_coding	ENSMUSG00000064356.3	17706		Dkk3	-3.58323	0.000194019	protein_coding	ENSMUSG00000030772.6	50781
USP16	10.8932	1.19258e-06	protein_coding	ENSG00000156256.14	10600		H2-Q2	3.95957	0.0479456	protein_coding	ENSMUSG00000091705.8	15013		1700001O22Rik	-3.53026	0.00413133	protein_coding	ENSMUSG00000044320.14	73598
NDUFV3	10.8355	1.19258e-06	protein_coding	ENSG00000160194.17	4731		Sln	3.9421	0.004455	protein_coding	ENSMUSG00000042045.5	66402		Slc35f3	-3.49131	0.0267202	protein_coding	ENSMUSG00000057060.7	210027
PDXK	10.7704	1.19258e-06	protein_coding	ENSG00000160209.18	8566		Dbh	3.75857	0.0397332	protein_coding	ENSMUSG00000000889.8	13166		Fgfbp1	-3.45348	0.0144898	protein_coding	ENSMUSG00000048373.8	14181
ATP5J	10.5526	1.19258e-06	protein_coding	ENSG00000154723.12	522		mt-Ts1	3.75772	0.00733292	Mt_tRNA	ENSMUSG00000064352.1	NA		Mss51	-3.40793	0.00140328	protein_coding	ENSMUSG00000021815.3	74843
UBE2G2	10.5146	1.19258e-06	protein_coding	ENSG00000184787.18	7327		Dmp1	3.74184	0.000930378	protein_coding	ENSMUSG00000029307.7	13406		Cdh4	-3.30852	4.28177e-06	protein_coding	ENSMUSG00000000305.12	12561
SON	10.4108	1.19258e-06	protein_coding	ENSG00000159140.18	6651		4930477O15Rik	3.71718	0.0117636	TEC, lincRNA	ENSMUSG00000104999.1	NA		Pld5	-3.24137	0.00124437	protein_coding	ENSMUSG00000055214.15	319455
PTTG1IP	10.3975	3.07438e-06	protein_coding	ENSG00000183255.11	754		Flywch2	3.66891	0.00538036	protein_coding	ENSMUSG00000023911.12	76917		Gm44400	-3.22209	0.0212243	TEC	ENSMUSG00000107488.1	NA
MCM3AP	10.3794	1.19258e-06	protein_coding	ENSG00000160294.10	8888		Ccdc92	3.63807	0.000194232	protein_coding	ENSMUSG00000037979.13	215707		Gm43521	-3.20701	0.0289769	TEC	ENSMUSG00000106511.1	NA
DIP2A	10.3449	1.80524e-06	protein_coding	ENSG00000160305.17	23181		mt-Co2	3.58309	0.0203104	protein_coding	ENSMUSG00000064354.1	17709		RP23-110M15.1	-3.1897	0.0302846	lincRNA	ENSMUSG00000109853.1	102635797
DSCR3	10.3111	1.19258e-06	protein_coding	ENSG00000157538.13	10311		Cyp4f14	3.56694	0.013542	protein_coding	ENSMUSG00000024292.14	64385		Gm1604a	-3.08576	0.0247128	protein_coding	ENSMUSG00000094083.1	381059
SUMO3	10.2733	1.80524e-06	protein_coding	ENSG00000184900.15	6612		Tmem181c-ps	3.52099	0.00627191	unprocessed_pseudogene	ENSMUSG00000093880.2	NA		Sorcs1	-3.06567	0.00569854	protein_coding	ENSMUSG00000043531.16	58178
URB1	10.1267	1.19258e-06	protein_coding	ENSG00000142207.6	9875		Rpl17-ps8	3.51605	0.0328662	processed_pseudogene	ENSMUSG00000082035.1	NA		Cntnap2	-2.8353	0.00228556	protein_coding	ENSMUSG00000039419.17	66797
HLCS	10.0619	1.8921e-06	protein_coding	ENSG00000159267.14	3141		Gm43694	3.48897	0.0421615	TEC	ENSMUSG00000107018.1	NA		Gm20109	-2.80473	0.0324757	lincRNA	ENSMUSG00000097714.1	NA
RRP1B	10.0123	1.45444e-06	protein_coding	ENSG00000160208.12	23076		Fam174b	3.3011	0.000371758	protein_coding	ENSMUSG00000078670.3	100038347		Neto2	-2.74886	0.00410623	protein_coding	ENSMUSG00000036902.10	74513
GABPA	9.95235	1.19258e-06	protein_coding	ENSG00000154727.10	2551		mt-Atp6	3.18224	0.0189021	protein_coding	ENSMUSG00000064357.1	17705		Lrtm2	-2.70789	0.0455622	protein_coding	ENSMUSG00000055003.14	211187
SLC5A3	9.94604	3.13688e-06	protein_coding	ENSG00000198743.6	6526		Gm11127	3.15667	0.00678943	protein_coding	ENSMUSG00000079492.2	100529082		Odf3l2	-2.7055	0.000672968	protein_coding	ENSMUSG00000035963.8	382384
GART	9.94006	1.19258e-06	protein_coding	ENSG00000159131.16	2618		Mthfd2	2.90426	0.00149428	protein_coding	ENSMUSG00000005667.8	17768		Col9a1	-2.66344	0.0246673	protein_coding	ENSMUSG00000026147.16	12839
IFNAR1	9.88096	1.80708e-06	protein_coding	ENSG00000142166.12	3454		mt-Nd4l	2.89833	0.0499592	protein_coding	ENSMUSG00000065947.3	17720		Fggy	-2.65691	0.000686186	protein_coding	ENSMUSG00000028573.18	75578
TTC3	9.73064	3.61577e-06	protein_coding	ENSG00000182670.13	7267		Gm42853	2.79638	0.0248301	TEC	ENSMUSG00000107021.1	NA		Syt9	-2.64827	0.0170152	protein_coding	ENSMUSG00000062542.11	60510
PAXBP1	9.7152	1.19258e-06	protein_coding	ENSG00000159086.14	94104		Gm22989	2.76734	0.0205229	snRNA	ENSMUSG00000088938.1	NA		Pla2g7	-2.64276	1.37214e-05	protein_coding	ENSMUSG00000023913.17	27226
BACH1	9.66251	2.38563e-06	protein_coding	ENSG00000156273.15	571		Srrm4os	2.75638	0.00232591	antisense	ENSMUSG00000086219.7	76798		Slc2a3	-2.59317	0.00107233	protein_coding	ENSMUSG00000003153.10	20527
PIGP	9.59225	1.19258e-06	protein_coding	ENSG00000185808.13	51227		Asns	2.73979	0.0108536	protein_coding	ENSMUSG00000029752.12	27053		Ighm	-2.57981	0.000640111	IG_C_gene	ENSMUSG00000076617.9	NA
MX2	9.53052	1.80524e-06	protein_coding	ENSG00000183486.12	4600		Myo1a	2.70025	0.00592328	protein_coding	ENSMUSG00000025401.8	432516		Gm10478	-2.52028	0.0424262	pseudogene	ENSMUSG00000073179.3	NA
LINC00649	9.46505	6.36456e-06	antisense	ENSG00000237945.7	100506334		Crip3	2.67074	6.948e-05	protein_coding	ENSMUSG00000023968.15	114570		Gm38048	-2.4865	0.00482961	sense_overlapping	ENSMUSG00000102437.1	NA
ETS2	9.4551	8.65651e-05	protein_coding	ENSG00000157557.11	2114		Apol9a	2.65815	0.0109171	protein_coding	ENSMUSG00000057346.11	223672		Shc2	-2.44225	3.13688e-06	protein_coding	ENSMUSG00000020312.11	216148
POFUT2	9.43577	1.19258e-06	protein_coding	ENSG00000186866.16	23275		Gm21738	2.60832	0.018123	protein_coding	ENSMUSG00000095280.1	NA		Mdga1	-2.40993	0.000442857	protein_coding	ENSMUSG00000043557.15	74762
N6AMT1	9.37591	1.19258e-06	protein_coding	ENSG00000156239.11	29104		1810041L15Rik	2.58691	0.000505798	protein_coding	ENSMUSG00000062760.10	72301		Prima1	-2.40528	0.0125471	protein_coding	ENSMUSG00000041669.15	170952
TMEM50B	9.34524	1.84013e-06	protein_coding	ENSG00000142188.16	757		Krt18	2.57217	0.00693792	protein_coding	ENSMUSG00000023043.6	16668		Cacna2d4	-2.37902	0.0287655	protein_coding	ENSMUSG00000041460.14	319734
TRAPPC10	9.33047	3.29322e-06	protein_coding	ENSG00000160218.12	7109		Gm43013	2.52155	0.0312609	processed_pseudogene	ENSMUSG00000106058.1	NA		Gck	-2.33829	0.00235394	protein_coding	ENSMUSG00000041798.15	103988
WRB	9.29616	1.67147e-06	protein_coding	ENSG00000182093.14	7485		Cilp	2.44072	0.00980357	protein_coding	ENSMUSG00000042254.14	214425		Slc4a10	-2.33698	0.000149909	protein_coding	ENSMUSG00000026904.17	94229
ITSN1	9.21681	1.80708e-06	protein_coding	ENSG00000205726.14	6453		Gm10801	2.43073	0.00508027	protein_coding	ENSMUSG00000075015.3	NA		Amd1	-2.31754	0.000239763	protein_coding	ENSMUSG00000075232.4	11702
CBR1	9.14477	1.40651e-06	protein_coding	ENSG00000159228.12	873		Apol9b	2.41047	0.0446058	protein_coding	ENSMUSG00000068246.5	71898		Snph	-2.30667	0.00310454	protein_coding	ENSMUSG00000027457.15	241727
SLC37A1	9.14102	1.67147e-06	protein_coding	ENSG00000160190.13	54020		Slco4a1	2.38765	0.00441708	protein_coding	ENSMUSG00000038963.15	108115		Amd2	-2.25421	0.00139747	protein_coding	ENSMUSG00000063953.2	100041585
PCNT	9.12056	2.64037e-06	protein_coding	ENSG00000160299.16	5116		Mogat1	2.36219	0.00262987	protein_coding	ENSMUSG00000012187.13	68393		Mir694	-2.17153	0.0342592	miRNA	ENSMUSG00000076147.1	751558
APP	9.08172	5.05132e-06	protein_coding	ENSG00000142192.20	351		E2f2	2.35973	0.000174562	protein_coding	ENSMUSG00000018983.9	242705		Mettl11b	-2.16753	0.000485611	protein_coding	ENSMUSG00000040113.14	240879
CCT8	9.05999	3.56658e-06	protein_coding	ENSG00000156261.12	10694		Gm5420	2.35056	0.00284327	lincRNA	ENSMUSG00000056716.9	432436		9830004L10Rik	-2.15849	0.000951358	lincRNA	ENSMUSG00000099552.1	NA
HMGN1	9.05681	2.31468e-06	protein_coding	ENSG00000205581.10	3150		Srrm4	2.31012	0.0045176	protein_coding	ENSMUSG00000063919.10	68955		Gm26995	-2.14617	0.0499592	antisense	ENSMUSG00000098072.1	NA
C2CD2	8.95762	1.88373e-06	protein_coding	ENSG00000157617.16	25966		Gm10720	2.27375	0.0477212	protein_coding	ENSMUSG00000074564.3	NA		Tmem100	-2.14506	0.00169681	protein_coding	ENSMUSG00000069763.3	67888
PRMT2	8.80243	1.84013e-06	protein_coding	ENSG00000160310.16	3275		Cpne2	2.27357	6.58242e-05	protein_coding	ENSMUSG00000034361.10	234577		Pla2g5	-2.12539	0.00928323	protein_coding	ENSMUSG00000041193.15	18784
PLAC4	8.74301	2.1513e-06	TEC	ENSG00000280109.1	NA		H2-T-ps	2.27231	0.0236892	unprocessed_pseudogene	ENSMUSG00000073405.6	667803		2310065F04Rik	-2.11687	2.1663e-05	lincRNA	ENSMUSG00000087410.7	74184
ANKRD30BP2	8.71208	3.51677e-06	transcribed_unprocessed_pseudogene	ENSG00000224309.7	NA		Gm11734	2.25834	0.00016224	lincRNA	ENSMUSG00000085419.1	NA		Amd-ps1	-2.07131	0.00538036	processed_pseudogene	ENSMUSG00000083823.3	NA
ADARB1	8.64134	1.88373e-06	protein_coding	ENSG00000197381.15	104		2310043O21Rik	2.25598	0.0121136	lincRNA	ENSMUSG00000102106.1	69679		Hist1h4n	-2.05013	0.0453885	protein_coding	ENSMUSG00000069305.3	319161
CLIC6	8.63496	5.36486e-06	protein_coding	ENSG00000159212.12	54102		1110002O04Rik	2.23461	0.0331762	lincRNA	ENSMUSG00000102531.1	NA		Exph5	-2.04178	0.00147772	protein_coding	ENSMUSG00000034584.3	320051
CH507-9B2.3	8.62317	3.14797e-05	protein_coding	ENSG00000280071.3	102724023		BC035947	2.21632	0.0065498	protein_coding	ENSMUSG00000090486.2	NA		Amd-ps4	-2.03072	0.0201397	processed_pseudogene	ENSMUSG00000019836.5	NA
SCAF4	8.62241	2.75376e-06	protein_coding	ENSG00000156304.14	57466		Zdbf2	2.17192	5.43059e-05	protein_coding	ENSMUSG00000027520.15	73884		A330015K06Rik	-2.02939	0.00417362	antisense	ENSMUSG00000104093.1	102637797
TSPEAR-AS1	8.59721	1.84013e-06	antisense	ENSG00000235890.2	NA		Gm10800	2.16419	0.000118056	protein_coding	ENSMUSG00000075014.1	NA		Stk26	-2.02801	7.03305e-05	protein_coding	ENSMUSG00000031112.10	70415
SYNJ1	8.59371	2.67127e-06	protein_coding	ENSG00000159082.17	8867		Ifi44	2.15839	0.00482961	protein_coding	ENSMUSG00000028037.13	99899		Wnt16	-2.0082	0.00506774	protein_coding	ENSMUSG00000029671.15	93735
AF121897.4	8.55808	7.01458e-06	processed_pseudogene	ENSG00000235012.1	NA		Mir344c	2.1538	0.0418109	miRNA	ENSMUSG00000077107.1	100526506		Nhs	-2.00128	0.000127078	protein_coding	ENSMUSG00000059493.13	195727
MRPL39	8.54101	3.29322e-06	protein_coding	ENSG00000154719.13	54148		A930003A15Rik	2.09943	0.00197014	protein_coding	ENSMUSG00000075330.3	NA		Mib1	-1.99314	3.51677e-06	protein_coding	ENSMUSG00000024294.13	225164
CYYR1	8.53966	3.29322e-06	protein_coding	ENSG00000166265.11	116159		Kcnk1	2.09605	0.00439629	protein_coding	ENSMUSG00000033998.9	16525		Igfn1	-1.98598	0.00627495	protein_coding	ENSMUSG00000051985.12	226438
IFNGR2	8.52023	3.11431e-06	protein_coding	ENSG00000159128.14	3460		Gm10425	2.08766	0.000926455	lincRNA	ENSMUSG00000097081.1	NA		Gm38106	-1.97755	0.0247096	TEC	ENSMUSG00000102266.1	NA
RWDD2B	8.47371	3.29322e-06	protein_coding	ENSG00000156253.6	10069		Adamts20	2.06841	4.84679e-06	protein_coding	ENSMUSG00000022449.14	223838		Tmem132b	-1.90497	0.0131954	protein_coding	ENSMUSG00000070498.3	208151
SETD4	8.46026	3.1407e-06	protein_coding	ENSG00000185917.13	54093		Tceal7	2.05079	0.000391968	protein_coding	ENSMUSG00000079428.8	100040972		Tpx2	-1.86182	0.000173035	protein_coding	ENSMUSG00000027469.16	72119
PFKL	8.44693	4.35845e-06	protein_coding	ENSG00000141959.16	5211		A330076H08Rik	2.02459	0.00398779	processed_transcript	ENSMUSG00000109321.1	320026		M1ap	-1.85187	0.00552974	protein_coding	ENSMUSG00000030041.9	110958
PKNOX1	8.44315	3.51677e-06	protein_coding	ENSG00000160199.14	5316		Gm29228	1.98884	0.0409775	processed_pseudogene	ENSMUSG00000101682.1	NA		1700071M16Rik	-1.84167	0.00147325	antisense	ENSMUSG00000090307.7	73504
PRDM15	8.41023	4.03513e-06	protein_coding	ENSG00000141956.13	63977		Isg15	1.98627	0.0301373	protein_coding	ENSMUSG00000035692.6	100038882		Gm15034	-1.83177	0.0121358	processed_pseudogene	ENSMUSG00000081320.1	NA
MX1	8.37407	4.75732e-06	protein_coding	ENSG00000157601.13	4599		Irf7	1.93651	0.00354159	protein_coding	ENSMUSG00000025498.15	54123		Gm42855	-1.82877	0.0472885	processed_pseudogene	ENSMUSG00000105706.1	NA
HSPA13	8.3235	3.51677e-06	protein_coding	ENSG00000155304.5	6782		H2-Q10	1.87376	0.0295586	protein_coding	ENSMUSG00000067235.14	15007		Gdf11	-1.82661	3.92509e-05	protein_coding	ENSMUSG00000025352.6	14561
RUNX1	8.29057	3.29322e-06	protein_coding	ENSG00000159216.18	861		Ankrd1	1.85642	1.41947e-05	protein_coding	ENSMUSG00000024803.8	107765		Smox	-1.8196	0.0019092	protein_coding	ENSMUSG00000027333.18	228608
CRYZL1	8.28139	5.36486e-06	protein_coding	ENSG00000205758.11	9946		AW551984	1.80632	0.0497609	protein_coding	ENSMUSG00000038112.15	244810		Kcnab1	-1.81642	0.00125605	protein_coding	ENSMUSG00000027827.16	16497
RRP1	8.27825	3.29322e-06	protein_coding	ENSG00000160214.12	8568		3632451O06Rik	1.77462	0.00421062	protein_coding	ENSMUSG00000036242.14	67419		RP23-261B5.1	-1.81062	0.000219014	TEC	ENSMUSG00000110411.1	NA
LTN1	8.17002	2.11288e-05	protein_coding	ENSG00000198862.13	26046		Cdkn1a	1.7716	0.00507076	protein_coding	ENSMUSG00000023067.13	12575		Mstn	-1.80769	5.43059e-05	protein_coding	ENSMUSG00000026100.6	17700
FAM207A	8.15488	3.13688e-06	protein_coding	ENSG00000160256.12	85395		RP23-54G8.4	1.76415	0.00555134	lincRNA	ENSMUSG00000109394.1	319893		Sorbs2	-1.77195	1.74332e-05	protein_coding	ENSMUSG00000031626.17	234214
ZBTB21	8.14118	2.31468e-06	protein_coding	ENSG00000173276.13	49854		1500012K07Rik	1.73715	0.0474875	processed_transcript	ENSMUSG00000097247.2	68954		Amd-ps3	-1.76415	0.0046522	processed_pseudogene	ENSMUSG00000060096.4	NA
URB1-AS1	8.12288	2.63369e-06	lincRNA	ENSG00000256073.3	84996		F830016B08Rik	1.72596	0.000917855	protein_coding	ENSMUSG00000090942.1	240328		Gm38158	-1.74253	0.00447799	processed_pseudogene	ENSMUSG00000103367.1	NA
ADAMTS1	8.06861	3.61577e-06	protein_coding	ENSG00000154734.14	9510		Adig	1.70913	0.0117113	protein_coding	ENSMUSG00000044405.4	246747		Uts2r	-1.70181	0.0366547	protein_coding	ENSMUSG00000039321.1	217369
MRPS6	8.05197	5.05132e-06	protein_coding	ENSG00000243927.5	64968		mt-Th	1.70365	0.00979676	Mt_tRNA	ENSMUSG00000064364.1	NA		Gm5432	-1.68779	0.0172065	lincRNA	ENSMUSG00000097580.1	NA
PSMG1	8.04626	4.69526e-06	protein_coding	ENSG00000183527.11	8624		Fam69c	1.69433	0.0356792	protein_coding	ENSMUSG00000047992.10	240479		Rasd2	-1.68521	0.00058707	protein_coding	ENSMUSG00000034472.13	75141
WDR4	7.90508	6.1877e-06	protein_coding	ENSG00000160193.11	10785		Slc7a5	1.69173	0.00310454	protein_coding	ENSMUSG00000040010.10	20539		Fam83d	-1.67377	0.00713045	protein_coding	ENSMUSG00000027654.2	71878
IFNAR2	7.87137	1.74332e-05	protein_coding	ENSG00000159110.19	3455		Gm2399	1.64001	0.0235184	protein_coding	ENSMUSG00000078141.2	NA		Ctxn3	-1.66888	0.000225344	protein_coding	ENSMUSG00000069372.3	629147
CHAF1B	7.83688	6.65241e-06	protein_coding	ENSG00000159259.7	8208		Exoc3l4	1.63984	0.00367391	protein_coding	ENSMUSG00000021280.8	74190		Casr	-1.66002	0.0345148	protein_coding	ENSMUSG00000051980.13	12374
TSPEAR-AS2	7.81923	3.13688e-06	antisense	ENSG00000182912.6	NA		Apln	1.60823	0.0160649	protein_coding	ENSMUSG00000037010.7	30878		Gm43699	-1.64481	0.0275985	lincRNA	ENSMUSG00000107244.1	NA
JAM2	7.8129	3.29322e-06	protein_coding	ENSG00000154721.14	58494		Palm2	1.59875	0.0251682	protein_coding	ENSMUSG00000090053.9	677884		Syt3	-1.62429	0.00154333	protein_coding	ENSMUSG00000030731.13	20981
DYRK1A	7.79175	1.19258e-06	protein_coding	ENSG00000157540.19	1859		Cxcl10	1.57415	0.0279262	protein_coding	ENSMUSG00000034855.13	15945		Ighg2c	-1.61619	0.0499337	IG_C_gene	ENSMUSG00000076612.7	NA
BACE2	7.71643	4.35845e-06	protein_coding	ENSG00000182240.15	25825		Acbd7	1.56866	0.0408677	protein_coding	ENSMUSG00000026644.6	78245		Aurka	-1.61544	0.000174562	protein_coding	ENSMUSG00000027496.15	20878
ITGB2	7.65125	0.000423999	protein_coding	ENSG00000160255.17	3689		Gm15420	1.5621	0.0470743	antisense	ENSMUSG00000087387.1	NA		Adamts3	-1.60955	0.0117138	protein_coding	ENSMUSG00000043635.12	330119
DONSON	7.53574	4.03513e-06	protein_coding	ENSG00000159147.17	29980		Gm9825	1.55967	0.00856611	processed_pseudogene	ENSMUSG00000096403.2	NA		Rmi2	-1.6079	0.0295576	protein_coding	ENSMUSG00000037991.9	223970
DNAJC28	7.43616	3.55251e-06	protein_coding	ENSG00000177692.11	54943		Oas2	1.55284	0.00287521	protein_coding	ENSMUSG00000032690.16	246728		Pmepa1	-1.60046	0.00254652	protein_coding	ENSMUSG00000038400.15	65112
C21orf33	7.43063	4.24097e-06	protein_coding	ENSG00000160221.16	8209		Slc1a1	1.55176	0.0157086	protein_coding	ENSMUSG00000024935.10	20510		Ccnk	-1.57994	1.52445e-06	protein_coding	ENSMUSG00000021258.9	12454
S100B	7.26973	0.000245602	protein_coding	ENSG00000160307.9	6285		Oasl1	1.54907	0.0213666	protein_coding	ENSMUSG00000041827.15	231655		Gm37053	-1.56368	0.00973704	TEC	ENSMUSG00000103348.1	NA
LCA5L	7.25468	4.69526e-06	protein_coding	ENSG00000157578.13	150082		Thrsp	1.53077	0.0272494	protein_coding	ENSMUSG00000035686.8	21835		Tiam1	-1.55392	0.000194232	protein_coding	ENSMUSG00000002489.15	21844
DOPEY2	7.21951	0.000216163	protein_coding	ENSG00000142197.12	9980		Trib3	1.52846	0.00635568	protein_coding	ENSMUSG00000032715.9	228775		Nr4a2	-1.55054	0.0189904	protein_coding	ENSMUSG00000026826.13	18227
TIAM1	7.21182	1.25038e-05	protein_coding	ENSG00000156299.13	7074		Arf4os	1.51661	0.0342531	antisense	ENSMUSG00000090861.1	NA		Hist1h4m	-1.54689	0.00328153	protein_coding	ENSMUSG00000069306.5	100041230
UMODL1	7.13756	1.60794e-05	protein_coding	ENSG00000177398.18	89766		Tnfaip2	1.48527	0.000174562	protein_coding	ENSMUSG00000021281.15	21928		Ttll7	-1.52887	0.000526152	protein_coding	ENSMUSG00000036745.15	70892
CSTB	7.04775	7.03305e-05	protein_coding	ENSG00000160213.5	1476		Gm4742	1.47804	0.0315824	processed_pseudogene	ENSMUSG00000105461.1	NA		Gm11512	-1.50695	0.0256666	processed_pseudogene	ENSMUSG00000081043.1	NA
TRPM2	7.04151	0.000225344	protein_coding	ENSG00000142185.16	7226		Ift122	1.46446	8.18297e-05	protein_coding	ENSMUSG00000030323.13	81896		2310016D03Rik	-1.50122	0.037481	lincRNA	ENSMUSG00000102098.1	69566
TSPEAR	7.02019	7.00899e-06	protein_coding	ENSG00000175894.14	54084		Bdnf	1.4605	0.0312777	protein_coding	ENSMUSG00000048482.14	12064		Tnmd	-1.498	0.0111435	protein_coding	ENSMUSG00000031250.8	64103
C21orf59	7.01934	7.01458e-06	protein_coding	ENSG00000159079.18	56683		B230311B06Rik	1.45592	0.0380171	lincRNA	ENSMUSG00000109284.1	381914		Nos1	-1.48893	0.000770096	protein_coding	ENSMUSG00000029361.18	18125
CH507-9B2.5	6.98032	0.000324465	protein_coding	ENSG00000275464.4	102724159		Gadd45a	1.44133	0.000337204	protein_coding	ENSMUSG00000036390.8	13197		Sorbs2os	-1.48476	0.00134894	antisense	ENSMUSG00000085440.1	319940
PAXBP1-AS1	6.81563	6.46871e-06	antisense	ENSG00000238197.5	100506215		Gabrr2	1.4171	0.0132982	protein_coding	ENSMUSG00000023267.10	14409		Macrod2os2	-1.47094	0.0205189	antisense	ENSMUSG00000074763.5	NA
C21orf58	6.79261	7.82758e-06	protein_coding	ENSG00000160298.17	54058		Rtp4	1.40412	0.000930378	protein_coding	ENSMUSG00000033355.6	67775		Fam65b	-1.45784	0.00768873	protein_coding	ENSMUSG00000036006.19	193385
BX322557.10	6.71175	2.9054e-05	processed_transcript	ENSG00000215447.7	NA		RP23-354I24.7	1.40032	0.00525683	lincRNA	ENSMUSG00000110656.1	NA		Mc2r	-1.45447	0.00354159	protein_coding	ENSMUSG00000045569.6	17200
DSCR4	6.68354	4.04966e-05	protein_coding	ENSG00000184029.9	10281		Enkur	1.40006	0.0459451	protein_coding	ENSMUSG00000026679.3	71233		Syp	-1.44359	0.00824191	protein_coding	ENSMUSG00000031144.15	20977
BTG3	6.6577	1.83858e-05	protein_coding	ENSG00000154640.14	10950		RP24-116C19.5	1.38923	0.0395302	protein_coding	ENSMUSG00000109739.1	NA		Kcnf1	-1.42521	0.0488747	protein_coding	ENSMUSG00000051726.6	382571
EVA1C	6.60693	2.11158e-05	protein_coding	ENSG00000166979.12	59271		Trpv3	1.38592	0.00546392	protein_coding	ENSMUSG00000043029.2	246788		Gdap1	-1.42354	0.00560081	protein_coding	ENSMUSG00000025777.8	14545
RCAN1	6.55746	0.000174562	protein_coding	ENSG00000159200.17	1827		4931431B13Rik	1.38347	0.0144898	processed_transcript	ENSMUSG00000108354.1	70973		Grem2	-1.42297	0.00944051	protein_coding	ENSMUSG00000050069.3	23893
CYYR1-AS1	6.52073	1.66795e-05	antisense	ENSG00000197934.8	100996571		Aldh18a1	1.36556	0.0170033	protein_coding	ENSMUSG00000025007.13	56454		Kcnc3	-1.42169	0.00629745	protein_coding	ENSMUSG00000062785.14	16504
POTED	6.46812	2.50701e-05	protein_coding	ENSG00000166351.10	317754		Ifit3	1.36556	0.0132437	protein_coding	ENSMUSG00000074896.3	15959		Gm15824	-1.41712	0.0173013	processed_pseudogene	ENSMUSG00000083435.2	NA
IL10RB	6.45705	0.000360739	protein_coding	ENSG00000243646.9	3588		Zfp57	1.36276	0.0188245	protein_coding	ENSMUSG00000036036.15	22715		Gm7329	-1.4155	0.0328662	processed_pseudogene	ENSMUSG00000100774.1	NA
LINC00310	6.36916	0.000126302	lincRNA	ENSG00000227456.7	114036		H2-T10	1.35854	0.0348472	polymorphic_pseudogene	ENSMUSG00000079491.9	NA		Hr	-1.40689	6.64924e-05	protein_coding	ENSMUSG00000022096.14	15460
AATBC	6.35751	2.06893e-05	antisense	ENSG00000215458.8	284837		Gm42509	1.33877	0.0171391	TEC	ENSMUSG00000105042.1	NA		Hsd17b7	-1.40627	0.00113564	protein_coding	ENSMUSG00000026675.12	15490
AP000704.5	6.31041	6.58242e-05	lincRNA	ENSG00000224790.2	NA		Clu	1.30784	8.63203e-05	protein_coding	ENSMUSG00000022037.14	12759		Hlf	-1.3957	0.00141829	protein_coding	ENSMUSG00000003949.16	217082
LRRC3	6.29973	0.000110094	protein_coding	ENSG00000160233.7	81543		Stk36	1.30182	0.0182005	protein_coding	ENSMUSG00000033276.18	269209		4933415F23Rik	-1.38099	0.0331762	protein_coding	ENSMUSG00000073730.2	66755
RSPH1	6.24942	6.948e-05	protein_coding	ENSG00000160188.9	89765		Gm4925	1.25836	0.048269	transcribed_processed_pseudogene	ENSMUSG00000069540.4	237433		Ptx4	-1.3706	0.0381476	protein_coding	ENSMUSG00000044172.6	68509
AP001065.15	6.19982	1.74332e-05	lincRNA	ENSG00000228709.1	NA		2010300C02Rik	1.24633	0.0113938	protein_coding	ENSMUSG00000026090.16	72097		Ankrd34a	-1.35733	0.0295497	protein_coding	ENSMUSG00000049097.9	545554
DSCR8	6.16446	1.66795e-05	protein_coding	ENSG00000198054.11	84677		Gm26704	1.22982	0.0365696	lincRNA	ENSMUSG00000097875.1	NA		Gm12199	-1.35519	0.033567	antisense	ENSMUSG00000087080.1	NA
MORC3	6.09119	0.000129213	protein_coding	ENSG00000159256.12	23515		Spag5	1.21213	0.00195367	protein_coding	ENSMUSG00000002055.9	54141		Col22a1	-1.32922	0.00241837	protein_coding	ENSMUSG00000079022.9	69700
KCNE2	6.00022	2.25885e-05	protein_coding	ENSG00000159197.3	9992		Tiam2	1.21206	0.00351541	protein_coding	ENSMUSG00000023800.14	24001		Thbs4	-1.32798	0.000722429	protein_coding	ENSMUSG00000021702.7	21828
AF015262.2	5.94906	4.11993e-05	lincRNA	ENSG00000234703.1	NA		Gm7993	1.19164	0.0331762	processed_pseudogene	ENSMUSG00000107092.1	NA		Col24a1	-1.32632	0.0133453	protein_coding	ENSMUSG00000028197.4	71355
ITGB2-AS1	5.92777	6.64924e-05	antisense	ENSG00000227039.6	100505746		Hba-ps4	1.1916	0.0347211	unprocessed_pseudogene	ENSMUSG00000084893.3	NA		Me1	-1.32594	5.36486e-06	protein_coding	ENSMUSG00000032418.15	17436
MYL6P2	5.58721	5.19873e-05	processed_pseudogene	ENSG00000235808.1	NA		RP23-385F3.1	1.18909	0.0033764	processed_pseudogene	ENSMUSG00000110131.1	NA		Adgrf4	-1.32391	0.00711297	protein_coding	ENSMUSG00000023918.12	78249
SSR4P1	5.50334	5.48349e-05	transcribed_processed_pseudogene	ENSG00000235374.2	728039		Tbc1d31	1.18509	0.00150624	protein_coding	ENSMUSG00000022364.14	210544		Gadl1	-1.31914	0.0120186	protein_coding	ENSMUSG00000056880.12	73748
HLCS-IT1	5.4742	0.000113967	sense_intronic	ENSG00000237646.1	NA		Chrna10	1.18305	0.00167192	protein_coding	ENSMUSG00000066279.3	504186		Pkp2	-1.31274	0.00197333	protein_coding	ENSMUSG00000041957.15	67451
HSF2BP	5.46171	9.5944e-05	protein_coding	ENSG00000160207.8	11077		RP23-385G14.1	1.17576	0.00700827	transcribed_unprocessed_pseudogene	ENSMUSG00000110298.1	NA		Fat3	-1.31157	0.00116615	protein_coding	ENSMUSG00000074505.4	270120
AP001442.2	5.41548	6.75773e-05	processed_transcript	ENSG00000233783.7	NA		Slc47a1	1.17226	0.00239216	protein_coding	ENSMUSG00000010122.14	67473		Cacng7	-1.29813	0.00222369	protein_coding	ENSMUSG00000069806.5	81904
TFF3	5.34458	0.000640111	protein_coding	ENSG00000160180.15	7033		Oasl2	1.17215	0.0109663	protein_coding	ENSMUSG00000029561.17	23962		Enox2	-1.29798	0.000159005	protein_coding	ENSMUSG00000031109.16	209224
MIS18A	5.33912	0.000174562	protein_coding	ENSG00000159055.3	54069		Sox4	1.17209	0.0378348	protein_coding	ENSMUSG00000076431.4	20677		Aox3	-1.29727	0.0187994	protein_coding	ENSMUSG00000064294.12	71724
AF129075.5	5.26818	7.03305e-05	sense_intronic	ENSG00000231125.2	NA		Spock3	1.16668	0.0331949	protein_coding	ENSMUSG00000054162.15	72902		Rtn4r	-1.29642	0.00241837	protein_coding	ENSMUSG00000043811.5	65079
AP000469.2	5.26228	0.000113967	lincRNA	ENSG00000224832.1	101927869		Camta1	1.16051	0.00464662	protein_coding	ENSMUSG00000014592.19	100072		Ddah1	-1.28665	0.0432498	protein_coding	ENSMUSG00000028194.15	69219
AL773572.7	5.20756	0.000219415	antisense	ENSG00000225745.8	NA		Tmem8	1.14928	0.0115356	protein_coding	ENSMUSG00000024180.13	60455		Gcnt1	-1.2824	0.0249415	protein_coding	ENSMUSG00000038843.17	14537
AP001625.6	5.18583	0.000526152	antisense	ENSG00000235772.1	NA		Ak4	1.14433	0.047377	protein_coding	ENSMUSG00000028527.18	11639		Morn4	-1.26616	0.00151502	protein_coding	ENSMUSG00000049670.8	226123
LINC01547	5.16602	0.0001315	lincRNA	ENSG00000183250.11	84536		Itga9	1.13286	0.00221141	protein_coding	ENSMUSG00000039115.13	104099		RP23-220F20.2	-1.25973	0.0159167	protein_coding	ENSMUSG00000110344.1	NA
DSCR9	5.15006	0.000224972	lincRNA	ENSG00000230366.9	257203		Tnfrsf19	1.13031	0.000526152	protein_coding	ENSMUSG00000060548.12	29820		Slc16a3	-1.25536	0.0012575	protein_coding	ENSMUSG00000025161.16	80879
AP000320.6	5.08366	0.000360739	antisense	ENSG00000225555.1	NA		Gnmt	1.11462	0.0347211	protein_coding	ENSMUSG00000002769.8	14711		Kera	-1.24756	0.00274761	protein_coding	ENSMUSG00000019932.7	16545
AP001432.14	5.07727	9.5944e-05	lincRNA	ENSG00000242553.1	NA		5330439K02Rik	1.11278	0.0455622	lincRNA	ENSMUSG00000097827.1	NA		Gm14698	-1.24547	7.20273e-05	protein_coding	ENSMUSG00000071748.2	NA
BACH1-IT2	5.05854	0.000199001	lincRNA	ENSG00000228817.4	NA		4930412C18Rik	1.11256	0.0161393	processed_transcript	ENSMUSG00000085558.7	NA		Gpnmb	-1.23124	0.0286198	protein_coding	ENSMUSG00000029816.10	93695
YBEY	5.03787	0.00154057	protein_coding	ENSG00000182362.13	54059		6430548M08Rik	1.11019	0.00285844	protein_coding	ENSMUSG00000031824.15	234797		Gm7135	-1.23028	0.0452901	transcribed_unprocessed_pseudogene	ENSMUSG00000101348.6	634346
AP001429.1	5.03017	0.000268118	sense_intronic	ENSG00000270116.1	NA		Armcx4	1.10549	0.000917855	protein_coding	ENSMUSG00000049804.9	100503043		Gpcpd1	-1.22097	0.000133362	protein_coding	ENSMUSG00000027346.15	74182
TRPM2-AS	5.02347	0.00030574	antisense	ENSG00000230061.2	NA		Apom	1.10313	0.0399634	protein_coding	ENSMUSG00000024391.7	55938		Tubb2b	-1.21472	0.047673	protein_coding	ENSMUSG00000045136.5	73710
ABCG1	5.01491	0.000337694	protein_coding	ENSG00000160179.18	9619		Tppp3	1.0926	0.00114187	protein_coding	ENSMUSG00000014846.12	67971		Myl4	-1.21397	0.0328662	protein_coding	ENSMUSG00000061086.12	17896
BRWD1-AS2	4.97143	0.000152456	antisense	ENSG00000255568.3	103091865		Gm45010	1.08575	0.0371667	TEC	ENSMUSG00000109015.1	NA		C530050E15Rik	-1.1985	0.00962014	lincRNA	ENSMUSG00000097838.1	NA
RNA5SP491	4.96602	0.00167192	rRNA	ENSG00000199806.1	NA		Pbld2	1.08165	0.0301057	protein_coding	ENSMUSG00000020072.14	67307		Adra1a	-1.19773	0.0104618	protein_coding	ENSMUSG00000045875.12	11549
AP000254.8	4.93764	0.000414661	antisense	ENSG00000273271.1	NA		Otud1	1.0782	0.00182379	protein_coding	ENSMUSG00000043415.5	71198		Nov	-1.19375	0.0255652	protein_coding	ENSMUSG00000037362.8	18133
LINC00205	4.93754	0.000194019	lincRNA	ENSG00000223768.1	NA		Clec18a	1.07213	0.00586091	protein_coding	ENSMUSG00000033633.13	353287		Eif3j1	-1.19248	0.0210524	protein_coding	ENSMUSG00000027236.8	78655
AP000692.10	4.84147	0.000174562	antisense	ENSG00000273199.1	NA		Tmem82	1.0717	0.0310951	protein_coding	ENSMUSG00000043085.14	213989		Junos	-1.1851	0.00025394	antisense	ENSMUSG00000087366.7	NA
BACH1-IT1	4.83337	0.000266186	sense_intronic	ENSG00000248476.1	NA		Gm18301	1.06726	0.044158	unprocessed_pseudogene	ENSMUSG00000099569.1	NA		Tbc1d1	-1.18263	0.0046008	protein_coding	ENSMUSG00000029174.18	57915
METTL21AP1	4.8183	0.00376303	processed_pseudogene	ENSG00000229623.1	NA		Serpinb1a	1.06219	0.0256666	protein_coding	ENSMUSG00000044734.15	66222		Fxyd2	-1.18034	0.0298471	protein_coding	ENSMUSG00000059412.6	11936
CBR3	4.80742	0.000177483	protein_coding	ENSG00000159231.5	874		Gm37691	1.05591	0.00508273	TEC	ENSMUSG00000104348.1	NA		Macrod2os1	-1.17573	0.0144942	antisense	ENSMUSG00000086450.1	NA
ZNF295-AS1	4.73137	0.000450567	lincRNA	ENSG00000237232.7	150142		Rapgefl1	1.04724	0.0331762	protein_coding	ENSMUSG00000038020.5	268480		Xpr1	-1.16424	0.000650457	protein_coding	ENSMUSG00000026469.14	19775
AL109761.5	4.69426	0.000239763	antisense	ENSG00000244676.5	NA		Fam83g	1.04321	0.00385105	protein_coding	ENSMUSG00000042377.8	69640		Styx	-1.16204	2.77626e-05	protein_coding	ENSMUSG00000053205.8	56291
GRIK1-AS1	4.68076	0.000350646	antisense	ENSG00000174680.9	NA		Sh2d4a	1.03728	0.00592328	protein_coding	ENSMUSG00000053886.4	72281		Nos1ap	-1.15983	0.0345191	protein_coding	ENSMUSG00000038473.14	70729
H2AFZP1	4.55415	0.000320609	processed_pseudogene	ENSG00000213440.2	NA		A830010M20Rik	1.03596	0.00433841	protein_coding	ENSMUSG00000044060.18	NA		Tpbgl	-1.14507	0.00182379	protein_coding	ENSMUSG00000096606.2	100503386
BACH1-AS1	4.5264	0.000485611	lincRNA	ENSG00000232118.2	NA		Sbsn	1.03085	0.0312609	protein_coding	ENSMUSG00000046056.15	282619		Lrtm1	-1.14485	0.0163662	protein_coding	ENSMUSG00000045776.2	319476
DSTNP1	4.52183	0.000363261	processed_pseudogene	ENSG00000230982.1	NA		Rapgef4os3	1.02566	0.038285	antisense	ENSMUSG00000086231.1	NA		Whrn	-1.14382	0.0138533	protein_coding	ENSMUSG00000039137.18	73750
RPS26P4	4.49476	0.000476565	processed_pseudogene	ENSG00000228349.1	NA		Katnal2	1.02535	0.0149179	protein_coding	ENSMUSG00000025420.13	71206		Cdk19	-1.14162	0.00171903	protein_coding	ENSMUSG00000038481.12	78334
PCBP2P1	4.49463	0.000502561	processed_pseudogene	ENSG00000235701.1	NA		Gm15543	1.01602	0.028692	antisense	ENSMUSG00000086863.1	105242817		4930556M19Rik	-1.13969	0.00458733	lincRNA	ENSMUSG00000096971.1	75259
TTC3-AS1	4.48845	0.000719606	antisense	ENSG00000228677.1	NA		Snai3	1.01339	0.000692472	protein_coding	ENSMUSG00000006587.6	30927		Gm17218	-1.13762	0.010649	antisense	ENSMUSG00000091078.1	NA
RIMKLBP1	4.46053	0.00105387	processed_pseudogene	ENSG00000189089.5	NA		Adam1b	1.01283	0.0462074	protein_coding	ENSMUSG00000062438.4	280667		Wnt4	-1.13128	0.00222091	protein_coding	ENSMUSG00000036856.4	22417
BRWD1-IT1	4.42193	0.000490247	sense_overlapping	ENSG00000237373.1	NA		Atf5	1.01002	0.00842974	protein_coding	ENSMUSG00000038539.15	107503		Gm5865	-1.11845	0.00592328	processed_pseudogene	ENSMUSG00000104923.1	NA
DIP2A-IT1	4.39876	0.000805609	sense_intronic	ENSG00000223692.1	100862692		Mx2	1.00433	0.0380587	polymorphic_pseudogene	ENSMUSG00000023341.14	17858		Spred3	-1.10842	0.00211451	protein_coding	ENSMUSG00000037239.8	101809
RP5-1023B21.1	4.33455	0.0017419	lincRNA	ENSG00000267857.2	NA		Tmem116	1.0034	0.013775	protein_coding	ENSMUSG00000029452.18	77462		Mylk2	-1.10477	0.00119059	protein_coding	ENSMUSG00000027470.9	228785
AF015720.3	4.2278	0.000794802	lincRNA	ENSG00000230794.1	NA		Fam166a	0.999959	0.0465149	protein_coding	ENSMUSG00000026969.3	68222		Tnc	-1.0972	0.000526152	protein_coding	ENSMUSG00000028364.15	21923
AP000240.9	4.20752	0.00055842	sense_intronic	ENSG00000273017.1	NA		Gm14762	0.999942	0.0422104	lincRNA	ENSMUSG00000078314.2	NA		Sema3a	-1.08996	0.00569854	protein_coding	ENSMUSG00000028883.17	20346
LINC01436	4.20699	0.00429029	lincRNA	ENSG00000231106.2	NA		Zfp69	0.998694	0.0433394	protein_coding	ENSMUSG00000064141.14	381549		Mfap3l	-1.0896	0.00264101	protein_coding	ENSMUSG00000031647.10	71306
AF064858.11	4.11588	0.000633644	lincRNA	ENSG00000237721.1	NA		0610040B10Rik	0.998019	0.00445917	antisense	ENSMUSG00000089889.2	NA		Ngf	-1.08276	0.0344648	protein_coding	ENSMUSG00000027859.10	18049
RNU6-859P	4.10311	0.000722429	snRNA	ENSG00000199598.1	NA		Gm15860	0.99555	0.0263883	antisense	ENSMUSG00000087336.2	NA		Comp	-1.08177	0.037781	protein_coding	ENSMUSG00000031849.9	12845
AP001505.10	4.09197	0.00274776	lincRNA	ENSG00000276529.1	NA		Mterf1a	0.992824	0.0326564	protein_coding	ENSMUSG00000040429.6	545725		Stab2	-1.08126	0.00547906	protein_coding	ENSMUSG00000035459.15	192188
AP000302.58	4.07036	0.00150624	antisense	ENSG00000231355.1	NA		Mogat2	0.988436	0.0321256	protein_coding	ENSMUSG00000052396.7	233549		Fmod	-1.08098	0.00151698	protein_coding	ENSMUSG00000041559.7	14264
KB-68A7.2	3.98543	0.00267266	lincRNA	ENSG00000277352.1	NA		Iigp1	0.988096	0.0324462	protein_coding	ENSMUSG00000054072.11	60440		Cpeb1	-1.07441	0.00423149	protein_coding	ENSMUSG00000025586.17	12877
TIMM9P2	3.96213	0.00339473	processed_pseudogene	ENSG00000232608.1	NA		Arid5a	0.98134	0.000945075	protein_coding	ENSMUSG00000037447.16	214855		Spns2	-1.0726	9.50125e-05	protein_coding	ENSMUSG00000040447.15	216892
LINC00189	3.9096	0.00413133	sense_overlapping	ENSG00000215533.8	193629		Gm38250	0.979348	0.0486278	antisense	ENSMUSG00000104168.1	NA		Bcl2	-1.06033	0.00094632	protein_coding	ENSMUSG00000057329.7	12043
LINC00334	3.82233	0.00141829	lincRNA	ENSG00000182586.7	114042		Vash2	0.974134	0.0358814	protein_coding	ENSMUSG00000037568.12	226841		Calm3	-1.05823	0.000253028	protein_coding	ENSMUSG00000019370.10	12315
HMGN1P2	3.77632	0.00216429	processed_pseudogene	ENSG00000229046.1	NA		Lrp2bp	0.971176	0.00125605	protein_coding	ENSMUSG00000031637.13	67620		Wbscr17	-1.0474	0.00425986	protein_coding	ENSMUSG00000034040.16	212996
RPS20P1	3.75355	0.00208629	processed_pseudogene	ENSG00000229761.1	NA		5031434C07Rik	0.968413	0.00610647	antisense	ENSMUSG00000044574.5	NA		Ccdc146	-1.04462	0.0410655	protein_coding	ENSMUSG00000064280.13	75172
RPS5P2	3.70133	0.00244913	processed_pseudogene	ENSG00000224598.1	NA		Gm5617	0.967716	0.00482961	protein_coding	ENSMUSG00000042293.7	434402		Smarca1	-1.04411	0.0382129	protein_coding	ENSMUSG00000031099.16	93761
RPL23P2	3.69582	0.00191359	processed_pseudogene	ENSG00000176054.6	NA		Rad51	0.967663	0.0326564	protein_coding	ENSMUSG00000027323.10	19361		AI854703	-1.03362	0.00362395	protein_coding	ENSMUSG00000053297.14	NA
SNORA81	3.49023	0.00434235	snoRNA	ENSG00000238390.1	NA		Osbp2	0.965348	0.0170105	protein_coding	ENSMUSG00000020435.17	74309		Stim2	-1.0307	4.04966e-05	protein_coding	ENSMUSG00000039156.19	116873
RNU6-614P	3.43277	0.00475453	snRNA	ENSG00000207097.1	NA		Pdp2	0.965059	0.00569854	protein_coding	ENSMUSG00000048371.8	382051		Mc5r	-1.02156	0.0488747	protein_coding	ENSMUSG00000007480.3	17203
BTF3P6	3.4313	0.00254652	processed_pseudogene	ENSG00000233956.1	NA		Lsmem1	0.959608	0.000216163	protein_coding	ENSMUSG00000071342.4	380755		Xylt1	-1.01862	0.00160626	protein_coding	ENSMUSG00000030657.11	233781
BACH1-IT3	3.40174	0.00397134	sense_intronic	ENSG00000234293.1	NA		Dqx1	0.953982	0.02952	protein_coding	ENSMUSG00000009145.6	93838		Shisa3	-1.01817	0.0234729	protein_coding	ENSMUSG00000050010.8	330096
AP001412.1	3.36493	0.00339892	antisense	ENSG00000272948.2	NA		Actn2	0.95266	0.00619496	protein_coding	ENSMUSG00000052374.14	11472		Pde4b	-1.01522	0.00279185	protein_coding	ENSMUSG00000028525.16	18578
AP001437.1	3.35429	0.00928323	antisense	ENSG00000273210.1	NA		Cmpk2	0.946282	0.0252345	protein_coding	ENSMUSG00000020638.7	22169		Tspyl5	-1.01162	0.0127257	protein_coding	ENSMUSG00000038984.3	239364
AF124730.4	3.27307	0.00900423	antisense	ENSG00000224649.1	NA		Tlcd2	0.939944	0.0222705	protein_coding	ENSMUSG00000038217.13	380712		Actr3b	-1.01097	0.000162134	protein_coding	ENSMUSG00000056367.14	242894
RP1-100J12.1	3.18317	0.00500354	antisense	ENSG00000273254.1	NA		Prkcz	0.939459	0.0424865	protein_coding	ENSMUSG00000029053.16	18762		Npnt	-1.01054	0.0314707	protein_coding	ENSMUSG00000040998.18	114249
AP001619.2	3.1819	0.00413133	sense_intronic	ENSG00000227698.1	NA		Aqp4	0.939089	0.0214016	protein_coding	ENSMUSG00000024411.9	11829		Net1	-1.00968	0.000337204	protein_coding	ENSMUSG00000021215.14	56349
AP001619.3	3.05387	0.00881113	antisense	ENSG00000236545.1	NA		E230016M11Rik	0.938136	0.0160649	processed_transcript	ENSMUSG00000087231.7	320172		Fam78a	-1.00743	0.00459709	protein_coding	ENSMUSG00000050592.8	241303
FGF7P2	2.8772	0.0298471	unprocessed_pseudogene	ENSG00000185390.2	NA		1810021B22Rik	0.937277	0.0108536	processed_transcript	ENSMUSG00000087331.8	69120		Gm7694	-1.00692	0.045876	protein_coding	ENSMUSG00000102752.1	665574
DPRXP5	2.79152	0.0452901	processed_pseudogene	ENSG00000270652.1	NA		Dnaja4	0.934123	0.00538036	protein_coding	ENSMUSG00000032285.15	58233		Fras1	-1.00435	0.0361963	protein_coding	ENSMUSG00000034687.8	231470
U3	2.7425	0.018123	snoRNA	ENSG00000212479.2	NA		Xirp1	0.931944	0.00651861	protein_coding	ENSMUSG00000079243.2	22437		Lrrc55	-1.00153	0.0488747	protein_coding	ENSMUSG00000075224.8	241528
AP001625.4	2.58699	0.0324564	sense_intronic	ENSG00000239930.2	101930094		Gm37759	0.930395	0.0357209	antisense	ENSMUSG00000102717.1	NA		Nkain1	-1.00117	0.000159005	protein_coding	ENSMUSG00000078532.9	67149
RNU6-123P	2.48186	0.0397986	snRNA	ENSG00000251972.1	NA		Plin3	0.927737	0.00204434	protein_coding	ENSMUSG00000024197.9	66905		Phex	-1.00047	0.0218659	protein_coding	ENSMUSG00000057457.11	18675
SNORA80A	2.39875	0.0410837	snoRNA	ENSG00000200792.1	677846		Gm45061	0.925621	0.029913	TEC	ENSMUSG00000108075.1	NA		Zfp52	-0.995771	0.00797388	protein_coding	ENSMUSG00000051341.5	22710
AP001439.2	2.3299	0.047673	antisense	ENSG00000224541.1	NA		Gm42974	0.923774	0.0331368	TEC	ENSMUSG00000104963.1	NA		Gm14680	-0.993762	0.00507076	processed_pseudogene	ENSMUSG00000081752.3	NA
							Bbc3	0.915441	0.0238236	protein_coding	ENSMUSG00000002083.13	170770		Calm1	-0.986342	2.97685e-05	protein_coding	ENSMUSG00000001175.13	12313
							4930451G09Rik	0.906693	0.0190721	protein_coding	ENSMUSG00000022543.8	74684		Slc30a2	-0.983466	0.0308736	protein_coding	ENSMUSG00000028836.14	230810
							Gm44193	0.905371	0.0156397	TEC	ENSMUSG00000107559.1	NA		Phka1	-0.981355	0.000207227	protein_coding	ENSMUSG00000034055.16	18679
							Ccdc189	0.90425	0.0427762	protein_coding	ENSMUSG00000057176.4	233899		Slc16a10	-0.980599	0.000545881	protein_coding	ENSMUSG00000019838.10	72472
							Tmem71	0.897802	0.00347701	protein_coding	ENSMUSG00000036944.5	213068		Gm36962	-0.973513	0.00707291	TEC	ENSMUSG00000103931.1	NA
							Actc1	0.895645	0.0249807	protein_coding	ENSMUSG00000068614.7	11464		Gm10605	-0.969846	0.0231062	lincRNA	ENSMUSG00000097974.1	NA
							Sytl2	0.885829	0.00918887	protein_coding	ENSMUSG00000030616.15	83671		Gm5881	-0.968681	0.00761693	processed_pseudogene	ENSMUSG00000107747.1	NA
							Gm13443	0.884071	0.00734214	processed_pseudogene	ENSMUSG00000075391.6	NA		Rnase13	-0.966593	0.0417725	protein_coding	ENSMUSG00000068392.2	497071
							Trim43a	0.878947	0.020429	protein_coding	ENSMUSG00000090693.3	547109		Tmem233	-0.965503	0.000194232	protein_coding	ENSMUSG00000079278.1	545798
							Lmcd1	0.876914	0.0032405	protein_coding	ENSMUSG00000057604.9	30937		Tifa	-0.962836	0.0423034	protein_coding	ENSMUSG00000046688.14	211550
							Nab2	0.871547	0.0144898	protein_coding	ENSMUSG00000025402.12	17937		Tcte2	-0.962748	0.0170033	protein_coding	ENSMUSG00000038347.14	21646
							H2-Q5	0.868133	0.0368839	polymorphic_pseudogene	ENSMUSG00000055413.12	15016		Smarcd3	-0.962618	2.9054e-05	protein_coding	ENSMUSG00000028949.13	66993
							A930018M24Rik	0.867807	0.00647296	protein_coding	ENSMUSG00000091089.1	NA		Gm10118	-0.961749	0.0320711	protein_coding	ENSMUSG00000062561.3	NA
							BC023105	0.861016	0.00592328	pseudogene	ENSMUSG00000063388.4	NA		Fam69a	-0.958593	0.00429029	protein_coding	ENSMUSG00000029270.10	67266
							A330074K22Rik	0.86016	0.0152233	lincRNA	ENSMUSG00000097960.1	434353		Fbp2	-0.949423	0.00127225	protein_coding	ENSMUSG00000021456.7	14120
							Slc7a1	0.859267	0.00930146	protein_coding	ENSMUSG00000041313.14	11987		D1Ertd622e	-0.946306	0.00397616	protein_coding	ENSMUSG00000044768.16	52392
							Slc25a13	0.852374	0.0326564	protein_coding	ENSMUSG00000015112.15	50799		D430041D05Rik	-0.943206	0.00385105	protein_coding	ENSMUSG00000068373.14	241589
							Gm26574	0.850122	0.0347408	antisense	ENSMUSG00000097925.1	NA		Gm11451	-0.941539	0.0349872	processed_pseudogene	ENSMUSG00000083567.3	NA
							Sacs	0.846397	0.00268943	protein_coding	ENSMUSG00000048279.17	50720		Wnk3	-0.938471	0.00399774	protein_coding	ENSMUSG00000041245.13	279561
							Spsb2	0.845179	0.00631102	protein_coding	ENSMUSG00000038451.13	14794		Tppp	-0.932917	0.00252039	protein_coding	ENSMUSG00000021573.14	72948
							Ephb1	0.845104	0.0489427	protein_coding	ENSMUSG00000032537.14	270190		Nek5	-0.928042	0.0446058	protein_coding	ENSMUSG00000037738.10	330721
							Ptprq	0.84422	0.0359825	protein_coding	ENSMUSG00000035916.7	237523		Adgre1	-0.928034	0.0408677	protein_coding	ENSMUSG00000004730.14	13733
							Dynlt1c	0.843194	0.0168206	protein_coding	ENSMUSG00000000579.14	100040563		Nmbr	-0.927312	0.0392855	protein_coding	ENSMUSG00000019865.9	18101
							Gm13943	0.841192	0.00555134	lincRNA	ENSMUSG00000085277.1	NA		Gpr155	-0.926548	9.14987e-05	protein_coding	ENSMUSG00000041762.16	68526
							Nudt5	0.839397	0.00547906	protein_coding	ENSMUSG00000025817.12	53893		Map9	-0.923857	0.029785	protein_coding	ENSMUSG00000033900.13	213582
							Cxx1b	0.834946	0.00105577	protein_coding	ENSMUSG00000067924.4	553127		Ccdc6	-0.919746	6.46871e-06	protein_coding	ENSMUSG00000048701.13	76551
							C130036L24Rik	0.830063	0.0121136	processed_transcript	ENSMUSG00000073627.7	NA		Vasp	-0.919012	0.00347701	protein_coding	ENSMUSG00000030403.9	22323
							Tspan13	0.82789	0.000611453	protein_coding	ENSMUSG00000020577.15	66109		Gm15820	-0.917086	0.0326564	processed_pseudogene	ENSMUSG00000107105.1	NA
							Egf	0.825525	0.00119059	protein_coding	ENSMUSG00000028017.7	13645		Hoxa11	-0.915101	0.0403887	protein_coding	ENSMUSG00000038210.10	15396
							Gm6368	0.825379	0.0429342	processed_pseudogene	ENSMUSG00000080775.1	NA		Gm15511	-0.914773	0.0372125	antisense	ENSMUSG00000086648.1	102642202
							Parp14	0.824407	0.00241837	protein_coding	ENSMUSG00000034422.14	547253		Slc38a4	-0.911456	0.00482961	protein_coding	ENSMUSG00000022464.13	69354
							Abra	0.824181	0.0110549	protein_coding	ENSMUSG00000042895.5	223513		Map2k6	-0.908957	0.00203742	protein_coding	ENSMUSG00000020623.11	26399
							Nxpe3	0.822372	0.0477212	protein_coding	ENSMUSG00000075033.3	385658		D930007P13Rik	-0.904602	0.0499592	lincRNA	ENSMUSG00000097003.1	432989
							Tbx6	0.81878	0.037072	protein_coding	ENSMUSG00000030699.16	21389		Fgf7	-0.903313	0.0172706	protein_coding	ENSMUSG00000027208.14	14178
							Slc25a34	0.815731	0.0468433	protein_coding	ENSMUSG00000040740.7	384071		Aebp1	-0.90018	0.0286478	protein_coding	ENSMUSG00000020473.13	11568
							Gm9920	0.804578	0.0477212	protein_coding	ENSMUSG00000053749.12	100503794		Ptgfr	-0.897015	0.047673	protein_coding	ENSMUSG00000028036.6	19220
							Sept1	0.80245	0.0102619	protein_coding	ENSMUSG00000000486.13	54204		Scamp5	-0.89499	0.0328682	protein_coding	ENSMUSG00000040722.6	56807
							Ifih1	0.798887	0.00293106	protein_coding	ENSMUSG00000026896.14	71586		Pdgfc	-0.89437	0.0429275	protein_coding	ENSMUSG00000028019.9	54635
							Gpt	0.798462	0.00241837	protein_coding	ENSMUSG00000022546.4	76282		Itga4	-0.893836	0.000224972	protein_coding	ENSMUSG00000027009.18	16401
							Prrxl1	0.797671	0.0413011	protein_coding	ENSMUSG00000041730.13	107751		Slc37a4	-0.891787	0.00986477	protein_coding	ENSMUSG00000032114.8	14385
							Gm42972	0.796197	0.0403245	TEC	ENSMUSG00000105445.1	NA		Col11a1	-0.88868	0.0122537	protein_coding	ENSMUSG00000027966.20	12814
							Rhou	0.795624	0.0248703	protein_coding	ENSMUSG00000039960.5	69581		Il1rl1	-0.884997	0.0363034	protein_coding	ENSMUSG00000026069.15	17082
							Arhgef2	0.794843	0.000265892	protein_coding	ENSMUSG00000028059.15	16800		Fam189b	-0.883001	0.00670938	protein_coding	ENSMUSG00000032657.15	68521
							Pank1	0.794627	0.0253165	protein_coding	ENSMUSG00000033610.15	75735		Gcnt2	-0.881826	0.00595317	protein_coding	ENSMUSG00000021360.15	14538
							Aspa	0.79238	0.00797388	protein_coding	ENSMUSG00000020774.9	11484		Vit	-0.881677	0.0298812	protein_coding	ENSMUSG00000024076.9	74199
							Rsad2	0.787595	0.0488747	protein_coding	ENSMUSG00000020641.15	58185		Col8a2	-0.880332	0.0455622	protein_coding	ENSMUSG00000056174.8	329941
							Gm42973	0.77929	0.0456161	TEC	ENSMUSG00000105733.1	NA		Polk	-0.873283	0.000216163	protein_coding	ENSMUSG00000021668.14	27015
							Got1	0.778917	0.000737464	protein_coding	ENSMUSG00000025190.13	14718		Tbx18	-0.872052	0.0373857	protein_coding	ENSMUSG00000032419.8	76365
							Galnt7	0.773721	0.00590217	protein_coding	ENSMUSG00000031608.13	108150		Odc1	-0.869444	0.0239805	protein_coding	ENSMUSG00000011179.7	18263
							Obsl1	0.769585	0.0124881	protein_coding	ENSMUSG00000026211.17	98733		Gm38393	-0.865429	0.00301778	protein_coding	ENSMUSG00000000948.16	NA
							Prkg1	0.765121	0.0230242	protein_coding	ENSMUSG00000052920.14	19091		Fibin	-0.865251	0.0122956	protein_coding	ENSMUSG00000074971.4	67606
							Gm10524	0.76237	0.0454242	TEC	ENSMUSG00000097141.2	NA		Mylk4	-0.862844	0.00413133	protein_coding	ENSMUSG00000044951.13	238564
							Tal2	0.761017	0.0382996	protein_coding	ENSMUSG00000028417.3	21350		Tigd4	-0.862736	0.00943549	protein_coding	ENSMUSG00000047819.3	403175
							Hmga1-rs1	0.756764	0.0176633	protein_coding	ENSMUSG00000078249.5	111241		Chodl	-0.861881	0.0488747	protein_coding	ENSMUSG00000022860.14	246048
							Ift27	0.755154	0.0328662	protein_coding	ENSMUSG00000016637.6	67042		Tfcp2l1	-0.859923	0.0162492	protein_coding	ENSMUSG00000026380.10	81879
							Ckmt2	0.753973	0.00925886	protein_coding	ENSMUSG00000021622.3	76722		Auts2	-0.852817	0.00848134	protein_coding	ENSMUSG00000029673.17	319974
							P2ry1	0.753356	0.0173013	protein_coding	ENSMUSG00000027765.6	18441		Srcin1	-0.850591	0.00410172	protein_coding	ENSMUSG00000038453.16	56013
							Perm1	0.752107	0.00106877	protein_coding	ENSMUSG00000078486.3	74183		Tdrkh	-0.850059	0.00527814	protein_coding	ENSMUSG00000041912.12	72634
							2210011C24Rik	0.749773	0.0128697	protein_coding	ENSMUSG00000074217.8	70134		Zfp467	-0.848872	0.00251967	protein_coding	ENSMUSG00000068551.12	68910
							Myog	0.748208	0.0499592	protein_coding	ENSMUSG00000026459.5	17928		Mpp3	-0.848695	0.0312777	protein_coding	ENSMUSG00000052373.14	13384
							Ifit1	0.7478	0.0348472	protein_coding	ENSMUSG00000034459.8	15957		Aph1c	-0.842437	0.0471264	protein_coding	ENSMUSG00000053040.13	68318
							Trp63	0.743792	0.00135975	protein_coding	ENSMUSG00000022510.14	22061		Smtnl2	-0.841816	0.00520028	protein_coding	ENSMUSG00000045667.14	276829
							Slc16a1	0.743589	0.00292724	protein_coding	ENSMUSG00000032902.1	20501		Sms	-0.835542	0.00252039	protein_coding	ENSMUSG00000071708.11	20603
							Esrrg	0.74128	0.0329909	protein_coding	ENSMUSG00000026610.13	26381		Adgrl1	-0.834156	0.00683684	protein_coding	ENSMUSG00000013033.16	330814
							Apobec2	0.736065	0.00211451	protein_coding	ENSMUSG00000040694.3	11811		Hoxa13	-0.832957	0.0132152	protein_coding	ENSMUSG00000038203.18	15398
							Gm16216	0.73547	0.0361697	processed_pseudogene	ENSMUSG00000082107.1	NA		Pdlim7	-0.832264	0.000324465	protein_coding	ENSMUSG00000021493.15	67399
							Fam83h	0.734176	0.0118591	protein_coding	ENSMUSG00000046761.12	105732		Klf2	-0.826457	0.0454024	protein_coding	ENSMUSG00000055148.7	16598
							2810032G03Rik	0.733253	0.047673	lincRNA	ENSMUSG00000037735.7	72669		Ccdc50	-0.822349	0.00029039	protein_coding	ENSMUSG00000038127.14	67501
							Zfp870	0.727554	0.0275985	protein_coding	ENSMUSG00000095325.1	240066		mt-Tp	-0.82133	0.000692472	Mt_tRNA	ENSMUSG00000064372.1	NA
							Kdr	0.726568	0.019253	protein_coding	ENSMUSG00000062960.10	16542		Ppp1r14c	-0.820953	0.000729215	protein_coding	ENSMUSG00000040653.5	76142
							Btnl9	0.725601	0.0315824	protein_coding	ENSMUSG00000040283.14	237754		Ccnyl1	-0.820768	0.00292724	protein_coding	ENSMUSG00000070871.10	227210
							Rad9b	0.72455	0.028414	protein_coding	ENSMUSG00000038569.13	231724		Rnf126	-0.817419	0.00274776	protein_coding	ENSMUSG00000035890.8	70294
							Gmnn	0.724026	0.0157093	protein_coding	ENSMUSG00000006715.11	57441		Gnao1	-0.817035	0.00213213	protein_coding	ENSMUSG00000031748.16	14681
							Mvd	0.723724	0.0267916	protein_coding	ENSMUSG00000006517.5	192156		Arnt2	-0.815966	0.0482945	protein_coding	ENSMUSG00000015709.9	11864
							Coq8a	0.719678	0.00125605	protein_coding	ENSMUSG00000026489.13	67426		Ybx3	-0.813966	0.000442857	protein_coding	ENSMUSG00000030189.15	56449
							Gm26628	0.71798	0.0484142	antisense	ENSMUSG00000097133.1	102632638		Kmt5a	-0.803635	0.00108012	protein_coding	ENSMUSG00000049327.17	67956
							Tbc1d4	0.716861	0.0152043	protein_coding	ENSMUSG00000033083.16	210789		Gm43268	-0.803422	0.0265348	TEC	ENSMUSG00000107182.1	NA
							1110020A21Rik	0.716123	0.0432362	lincRNA	ENSMUSG00000097047.1	68531		Mtss1l	-0.803148	0.00376584	protein_coding	ENSMUSG00000033763.14	244654
							Habp2	0.715814	0.0257351	protein_coding	ENSMUSG00000025075.14	226243		Zfp277	-0.803029	0.0172706	protein_coding	ENSMUSG00000055917.14	246196
							Evc	0.715484	0.00450778	protein_coding	ENSMUSG00000029122.11	59056		Myh4	-0.801357	0.00279185	protein_coding	ENSMUSG00000057003.12	17884
							Tmem47	0.713482	0.00978879	protein_coding	ENSMUSG00000025666.16	192216		Hacd1	-0.800597	0.000806216	protein_coding	ENSMUSG00000063275.15	30963
							Gm6736	0.713343	0.0328662	processed_pseudogene	ENSMUSG00000071414.4	NA		Cd109	-0.798693	0.0127127	protein_coding	ENSMUSG00000046186.8	235505
							Fam69b	0.712129	0.0326145	protein_coding	ENSMUSG00000036186.5	56279		Gnpnat1	-0.797026	0.000754855	protein_coding	ENSMUSG00000037722.7	54342
							Snn	0.704527	0.0271701	protein_coding	ENSMUSG00000037972.6	20621		Cys1	-0.790644	0.0475196	protein_coding	ENSMUSG00000062563.14	12879
							Plet1	0.704226	0.0380789	protein_coding	ENSMUSG00000032068.14	76509		Acvr1b	-0.788182	0.00520028	protein_coding	ENSMUSG00000000532.10	11479
							Amot	0.703122	0.000917855	protein_coding	ENSMUSG00000041688.16	27494		Pde7a	-0.786073	0.00169416	protein_coding	ENSMUSG00000069094.12	18583
							Gm10390	0.702752	0.0215767	antisense	ENSMUSG00000097368.2	100503427		Gid4	-0.784608	0.000239051	protein_coding	ENSMUSG00000018415.14	66771
							Deptor	0.701598	0.0166069	protein_coding	ENSMUSG00000022419.15	97998		Gm43946	-0.781958	0.00931763	TEC	ENSMUSG00000107720.1	NA
							Stc2	0.700415	0.0422104	protein_coding	ENSMUSG00000020303.2	20856		Plekhb1	-0.778666	0.0043918	protein_coding	ENSMUSG00000030701.17	27276
							Cdkl3	0.699087	0.00547802	protein_coding	ENSMUSG00000020389.19	213084		Gm14326	-0.777658	0.00547935	protein_coding	ENSMUSG00000078862.10	665211
							Ptpn14	0.698853	0.00213747	protein_coding	ENSMUSG00000026604.17	19250		Cpeb2	-0.774463	0.0019486	protein_coding	ENSMUSG00000039782.14	231207
							Gm35339	0.697332	0.0256658	protein_coding	ENSMUSG00000109179.1	102638882		Sap30	-0.770272	0.0263883	protein_coding	ENSMUSG00000031609.3	60406
							Ache	0.695514	0.0134843	protein_coding	ENSMUSG00000023328.14	11423		Igfbp5	-0.766975	0.0133726	protein_coding	ENSMUSG00000026185.8	16011
							Bche	0.690911	0.043263	protein_coding	ENSMUSG00000027792.11	12038		Msrb3	-0.765819	0.000360739	protein_coding	ENSMUSG00000051236.13	320183
							Ppm1k	0.689987	0.00094632	protein_coding	ENSMUSG00000037826.5	243382		Gprc5b	-0.764951	0.000159005	protein_coding	ENSMUSG00000008734.9	64297
							Lrrc74b	0.689718	0.0248154	protein_coding	ENSMUSG00000022759.13	74685		Gm15943	-0.763405	0.0455622	processed_transcript	ENSMUSG00000086801.1	NA
							Gm15545	0.689262	0.0328662	antisense	ENSMUSG00000087138.1	100502630		Syt8	-0.761066	0.0456161	protein_coding	ENSMUSG00000031098.18	55925
							Stbd1	0.688133	0.0385652	protein_coding	ENSMUSG00000047963.7	52331		Gm43807	-0.76051	0.0490559	sense_intronic	ENSMUSG00000107048.1	NA
							Kctd1	0.687328	0.0474875	protein_coding	ENSMUSG00000036225.14	106931		Col12a1	-0.758853	0.00733292	protein_coding	ENSMUSG00000032332.17	12816
							Gm5113	0.685499	0.00413133	protein_coding	ENSMUSG00000066647.6	330503		Fermt2	-0.754945	7.03305e-05	protein_coding	ENSMUSG00000037712.15	218952
							B9d2	0.682388	0.0271058	protein_coding	ENSMUSG00000063439.7	232987		Slc25a30	-0.751737	0.0271008	protein_coding	ENSMUSG00000022003.6	67554
							Nlrc5	0.682042	0.0403104	protein_coding	ENSMUSG00000074151.13	434341		Hook1	-0.751727	0.00385105	protein_coding	ENSMUSG00000028572.13	77963
							Iqcg	0.67919	0.0243045	protein_coding	ENSMUSG00000035578.15	69707		Gas1	-0.751677	0.00183999	protein_coding	ENSMUSG00000052957.7	14451
							Gm7967	0.677809	0.0357209	lincRNA	ENSMUSG00000100009.6	NA		Bmp2	-0.748429	0.017905	protein_coding	ENSMUSG00000027358.6	12156
							Cdc14a	0.670752	0.0414873	protein_coding	ENSMUSG00000033502.14	229776		Dennd2c	-0.748083	0.0129784	protein_coding	ENSMUSG00000007379.15	329727
							Parp10	0.669373	0.00885712	protein_coding	ENSMUSG00000063268.12	671535		Mab21l1	-0.745501	0.0385722	protein_coding	ENSMUSG00000056947.5	17116
							Tm6sf1	0.667872	0.0334463	protein_coding	ENSMUSG00000038623.9	107769		Tspan8	-0.745028	0.0119866	protein_coding	ENSMUSG00000034127.14	216350
							Fam13a	0.66654	0.0117205	protein_coding	ENSMUSG00000037709.13	58909		Mrln	-0.744651	0.0120903	processed_transcript	ENSMUSG00000019933.7	69563
							Evc2	0.665288	0.00121114	protein_coding	ENSMUSG00000050248.11	68525		Plekho1	-0.742404	0.0019738	protein_coding	ENSMUSG00000015745.9	67220
							Rfx5	0.658408	0.00482961	protein_coding	ENSMUSG00000005774.12	53970		Gm22362	-0.740787	0.0369583	snoRNA	ENSMUSG00000065036.1	115486329
							Ldhd	0.657205	0.00560952	protein_coding	ENSMUSG00000031958.16	52815		Prkab2	-0.734744	0.00435259	protein_coding	ENSMUSG00000038205.12	108097
							App	0.656949	0.00817438	protein_coding	ENSMUSG00000022892.10	11820		Homer1	-0.734263	0.000346029	protein_coding	ENSMUSG00000007617.17	26556
							Ltbp1	0.65478	0.00433846	protein_coding	ENSMUSG00000001870.15	268977		Rhobtb1	-0.733256	0.0119666	protein_coding	ENSMUSG00000019944.14	69288
							Fam110a	0.651628	0.0314663	protein_coding	ENSMUSG00000027459.16	73847		Eya1	-0.732862	0.000239051	protein_coding	ENSMUSG00000025932.14	14048
							Plet1os	0.650809	0.0241158	antisense	ENSMUSG00000101304.1	69631		Six2	-0.732157	0.01562	protein_coding	ENSMUSG00000024134.11	20472
							2900052L18Rik	0.649612	0.00851169	processed_transcript	ENSMUSG00000043993.6	NA		Anxa1	-0.731283	0.0462074	protein_coding	ENSMUSG00000024659.14	16952
							Flnc	0.647639	0.0140603	protein_coding	ENSMUSG00000068699.12	68794		Osbpl6	-0.729205	0.000917855	protein_coding	ENSMUSG00000042359.18	99031
							Ifi35	0.647411	0.0126849	protein_coding	ENSMUSG00000010358.13	70110		Shtn1	-0.72838	0.0453272	protein_coding	ENSMUSG00000041362.16	71653
							H2-T24	0.646001	0.0117815	protein_coding	ENSMUSG00000053835.17	15042		Capg	-0.727727	0.0151458	protein_coding	ENSMUSG00000056737.14	12332
							Klhl33	0.644941	0.0131526	protein_coding	ENSMUSG00000090799.1	546611		Gm10762	-0.727221	0.0344594	protein_coding	ENSMUSG00000074807.2	NA
							Tpm2	0.644613	0.0034581	protein_coding	ENSMUSG00000028464.16	22004		Nudt3	-0.722382	0.000340487	protein_coding	ENSMUSG00000024213.13	56409
							AW011738	0.64359	0.0213952	protein_coding	ENSMUSG00000078349.2	100382		Gfer	-0.719722	0.00928323	protein_coding	ENSMUSG00000040888.9	11692
							Sesn3	0.64293	0.00374111	protein_coding	ENSMUSG00000032009.8	75747		Prkcd	-0.719237	0.00817438	protein_coding	ENSMUSG00000021948.15	18753
							Pex6	0.641989	0.0169196	protein_coding	ENSMUSG00000002763.16	224824		Cd24a	-0.717314	0.00973704	protein_coding	ENSMUSG00000047139.8	12484
							Cyp4f13	0.639142	0.0349612	protein_coding	ENSMUSG00000024055.14	170716		Tgif1	-0.716961	0.0165367	protein_coding	ENSMUSG00000047407.17	21815
							Chrnb1	0.638096	0.00569854	protein_coding	ENSMUSG00000041189.9	11443		Dagla	-0.713973	0.00503506	protein_coding	ENSMUSG00000035735.10	269060
							Hspb1	0.637911	0.0100255	protein_coding	ENSMUSG00000004951.10	15507		Gpt2	-0.712042	0.00182379	protein_coding	ENSMUSG00000031700.11	108682
							Mpc1-ps	0.636503	0.00879736	processed_pseudogene	ENSMUSG00000091498.4	NA		E130308A19Rik	-0.708357	0.0380192	protein_coding	ENSMUSG00000045071.13	230259
							Cox6a2	0.635866	0.00245702	protein_coding	ENSMUSG00000030785.8	12862		Efemp1	-0.707064	0.0159167	protein_coding	ENSMUSG00000020467.15	216616
							Fam73b	0.63547	0.0497609	protein_coding	ENSMUSG00000026858.18	108958		Musk	-0.705715	0.0147264	protein_coding	ENSMUSG00000057280.15	18198
							4930513N20Rik	0.632139	0.00659955	TEC	ENSMUSG00000109225.1	NA		Slc10a7	-0.705683	0.00244231	protein_coding	ENSMUSG00000031684.11	76775
							Gm15337	0.631725	0.0446058	antisense	ENSMUSG00000085289.1	NA		Tdrp	-0.701665	0.0481661	protein_coding	ENSMUSG00000050052.12	72148
							Gm11613	0.630462	0.00627495	processed_transcript	ENSMUSG00000085586.1	NA		Samd1	-0.697538	0.0327111	protein_coding	ENSMUSG00000079003.2	666704
							Pnpla2	0.629968	0.0123832	protein_coding	ENSMUSG00000025509.15	66853		Tab2	-0.69686	0.000159005	protein_coding	ENSMUSG00000015755.16	68652
							4632428C04Rik	0.628764	0.0465867	lincRNA	ENSMUSG00000097184.1	100043102		Efhd1	-0.695765	0.0422104	protein_coding	ENSMUSG00000026255.15	98363
							Irs1	0.627771	0.0110549	protein_coding	ENSMUSG00000055980.2	16367		Vps72	-0.693661	0.00106877	protein_coding	ENSMUSG00000008958.14	21427
							Gm17197	0.627448	0.0129165	antisense	ENSMUSG00000090990.1	NA		Ppp1r14b	-0.693479	0.00155178	protein_coding	ENSMUSG00000056612.6	18938
							Plekhn1	0.62662	0.0381476	protein_coding	ENSMUSG00000078485.2	231002		Ociad2	-0.690281	0.0392244	protein_coding	ENSMUSG00000029153.11	433904
							Zfp827	0.625933	0.0286478	protein_coding	ENSMUSG00000071064.13	622675		Ldlrad4	-0.686682	0.00979676	protein_coding	ENSMUSG00000024544.8	52662
							Arhgap4	0.624382	0.0357033	protein_coding	ENSMUSG00000031389.17	171207		Cmya5	-0.683649	0.000125619	protein_coding	ENSMUSG00000047419.5	76469
							D330041H03Rik	0.623794	0.0168206	processed_transcript	ENSMUSG00000073437.10	654822		Klf4	-0.683182	0.0295497	protein_coding	ENSMUSG00000003032.8	16600
							Uck1	0.623517	0.0387854	protein_coding	ENSMUSG00000002550.16	22245		Rxrg	-0.682886	0.00502993	protein_coding	ENSMUSG00000015843.10	20183
							Runx1	0.62229	0.0225925	protein_coding	ENSMUSG00000022952.16	12394		RP24-343P7.1	-0.681979	0.0175398	processed_pseudogene	ENSMUSG00000110644.1	NA
							Fahd1	0.62215	0.00413133	protein_coding	ENSMUSG00000045316.4	68636		Ddit4l	-0.681259	0.00287521	protein_coding	ENSMUSG00000046818.7	73284
							Gm43162	0.621799	0.0267843	TEC	ENSMUSG00000104724.1	NA		9530086O07Rik	-0.678951	0.00250232	TEC	ENSMUSG00000108076.1	NA
							Gm38344	0.620587	0.0237536	TEC	ENSMUSG00000102452.1	NA		Phf7	-0.677998	0.00384326	protein_coding	ENSMUSG00000021902.6	71838
							Gm37953	0.61964	0.00465068	TEC	ENSMUSG00000104061.1	NA		Ppp1r3c	-0.677664	0.0378348	protein_coding	ENSMUSG00000067279.2	53412
							Tpra1	0.617806	0.0317613	protein_coding	ENSMUSG00000002871.14	24100		Zfp788	-0.672857	0.0192856	protein_coding	ENSMUSG00000074165.10	67607
							Fer1l6	0.616243	0.00973283	protein_coding	ENSMUSG00000037106.8	631797		Snrpn	-0.670108	0.00312778	protein_coding	ENSMUSG00000102252.5	20646
							Fdxr	0.616205	0.0109171	protein_coding	ENSMUSG00000018861.8	14149		Bhlhe40	-0.66783	0.0314663	protein_coding	ENSMUSG00000030103.11	20893
							Dmpk	0.615521	0.00205736	protein_coding	ENSMUSG00000030409.15	13400		Tmod2	-0.665928	0.00413133	protein_coding	ENSMUSG00000032186.14	50876
							Lmod3	0.615135	0.0101016	protein_coding	ENSMUSG00000044086.8	320502		Mllt11	-0.661878	0.00203267	protein_coding	ENSMUSG00000053192.9	56772
							Mettl21a	0.613826	0.00417362	protein_coding	ENSMUSG00000025956.10	67099		Usp6nl	-0.657433	0.0100025	protein_coding	ENSMUSG00000039046.15	98910
							Trim7	0.611325	0.00171833	protein_coding	ENSMUSG00000040350.15	94089		Hmga1	-0.654493	0.0225945	protein_coding	ENSMUSG00000046711.15	15361
							Cdc42ep2	0.610552	0.00252039	protein_coding	ENSMUSG00000045664.4	104252		Fgf2	-0.653832	0.0332814	protein_coding	ENSMUSG00000037225.13	14173
							Stat1	0.608679	0.01163	protein_coding	ENSMUSG00000026104.14	20846		Reep1	-0.653661	0.000256073	protein_coding	ENSMUSG00000052852.8	52250
							Abr	0.606042	0.00213351	protein_coding	ENSMUSG00000017631.18	109934		Gm42651	-0.653124	0.0466198	TEC	ENSMUSG00000104877.1	NA
							Vars2	0.604283	0.00175517	protein_coding	ENSMUSG00000038838.15	68915		Gm43953	-0.65295	0.0107313	TEC	ENSMUSG00000108067.1	NA
							Klf5	0.603278	0.0246703	protein_coding	ENSMUSG00000005148.7	12224		Ankrd44	-0.65277	0.00725434	protein_coding	ENSMUSG00000052331.14	329154
							Ppif	0.603048	0.00875199	protein_coding	ENSMUSG00000021868.6	105675		Eps15	-0.652039	0.000191847	protein_coding	ENSMUSG00000028552.13	13858
							Cntrob	0.601791	0.0392244	protein_coding	ENSMUSG00000032782.19	216846		Rsph3b	-0.650462	0.0286819	protein_coding	ENSMUSG00000023806.9	100037282
							Fut2	0.60113	0.0487107	protein_coding	ENSMUSG00000055978.5	14344		Tnfrsf21	-0.649829	0.0206364	protein_coding	ENSMUSG00000023915.4	94185
							B3galt1	0.600774	0.0238925	protein_coding	ENSMUSG00000034780.6	26877		Fhl3	-0.649007	0.00973704	protein_coding	ENSMUSG00000032643.12	14201
							Fv1	0.600391	0.0415771	protein_coding	ENSMUSG00000070583.1	14349		Mcm3	-0.648794	0.0416991	protein_coding	ENSMUSG00000041859.10	17215
							Ndc1	0.599788	0.00244824	protein_coding	ENSMUSG00000028614.14	72787		5330439B14Rik	-0.645643	0.0497609	antisense	ENSMUSG00000104234.1	321015
							Calr3	0.598132	0.0368839	protein_coding	ENSMUSG00000019732.14	73316		Gm26911	-0.643804	0.0371726	antisense	ENSMUSG00000097834.2	NA
							Neat1	0.590645	0.000684504	lincRNA	ENSMUSG00000092274.2	66961		Pcdhga11	-0.643393	0.029785	protein_coding	ENSMUSG00000102742.1	93723
							Acsl1	0.590593	0.0298767	protein_coding	ENSMUSG00000018796.13	14081		Ubald2	-0.640891	0.00836686	protein_coding	ENSMUSG00000050628.6	319370
							Ttc7	0.588303	0.00432818	protein_coding	ENSMUSG00000036918.15	225049		Srebf1	-0.640786	0.0402274	protein_coding	ENSMUSG00000020538.15	20787
							Adam1a	0.586262	0.0455622	protein_coding	ENSMUSG00000072647.5	280668		Otub2	-0.640208	0.00709878	protein_coding	ENSMUSG00000021203.15	68149
							Acot9	0.58535	0.00913093	protein_coding	ENSMUSG00000025287.15	56360		Csde1	-0.639537	0.000441633	protein_coding	ENSMUSG00000068823.10	229663
							Tnfsf10	0.58385	0.0236892	protein_coding	ENSMUSG00000039304.11	22035		Abca1	-0.639236	0.00853201	protein_coding	ENSMUSG00000015243.4	11303
							Nme1	0.583094	0.00358218	protein_coding	ENSMUSG00000037601.11	18102		Hrasls	-0.638115	0.00557508	protein_coding	ENSMUSG00000022525.13	27281
							Cst6	0.58209	0.0245883	protein_coding	ENSMUSG00000024846.5	73720		Npc1	-0.636437	0.00146713	protein_coding	ENSMUSG00000024413.13	18145
							Rab20	0.581752	0.044158	protein_coding	ENSMUSG00000031504.6	19332		Ldha-ps2	-0.635812	0.0125153	processed_pseudogene	ENSMUSG00000083836.1	NA
							Gm42507	0.58045	0.0348059	TEC	ENSMUSG00000107168.1	NA		Rora	-0.635516	0.00139747	protein_coding	ENSMUSG00000032238.17	19883
							Rnf122	0.580443	0.0105065	protein_coding	ENSMUSG00000039328.10	68867		Dyrk2	-0.635343	0.0173013	protein_coding	ENSMUSG00000028630.8	69181
							Gtpbp6	0.57905	0.0349448	protein_coding	ENSMUSG00000033434.15	107999		Fam122a	-0.629497	0.00785363	protein_coding	ENSMUSG00000074922.1	68034
							Art5	0.578296	0.00979676	protein_coding	ENSMUSG00000070424.12	11875		Ammecr1	-0.627972	0.0108536	protein_coding	ENSMUSG00000042225.3	56068
							Tldc1	0.577791	0.020429	protein_coding	ENSMUSG00000034105.9	74347		Vldlr	-0.626695	0.0395302	protein_coding	ENSMUSG00000024924.14	22359
							Gm11361	0.576811	0.0241278	processed_pseudogene	ENSMUSG00000061330.7	NA		Maoa	-0.626473	0.0435593	protein_coding	ENSMUSG00000025037.6	17161
							L3mbtl3	0.57362	0.00347701	protein_coding	ENSMUSG00000039089.14	237339		Plcd4	-0.621003	0.0252727	protein_coding	ENSMUSG00000026173.15	18802
							Cars	0.573531	0.00129747	protein_coding	ENSMUSG00000010755.17	27267		Gm7332	-0.620985	0.0429275	processed_pseudogene	ENSMUSG00000080875.4	NA
							Atrnl1	0.571654	0.00252039	protein_coding	ENSMUSG00000054843.8	226255		Rab12	-0.620672	0.000737982	protein_coding	ENSMUSG00000023460.12	19328
							Hspb6	0.566791	0.0289937	protein_coding	ENSMUSG00000036854.14	243912		Smad7	-0.620559	0.00670938	protein_coding	ENSMUSG00000025880.11	17131
							Slc25a22	0.566117	0.0473781	protein_coding	ENSMUSG00000019082.18	68267		Cbfb	-0.620151	0.00385105	protein_coding	ENSMUSG00000031885.14	12400
							H2-T23	0.56403	0.0206092	protein_coding	ENSMUSG00000067212.8	15040		Jak2	-0.618043	0.017905	protein_coding	ENSMUSG00000024789.12	16452
							Cenpq	0.563102	0.026774	protein_coding	ENSMUSG00000023919.7	83815		Gm43947	-0.616983	0.00185754	TEC	ENSMUSG00000107448.1	NA
							Trappc12	0.562285	0.00785363	protein_coding	ENSMUSG00000020628.15	217449		Rai14	-0.614414	0.0295709	protein_coding	ENSMUSG00000022246.13	75646
							Etv5	0.561586	0.0137363	protein_coding	ENSMUSG00000013089.15	104156		Optn	-0.613349	0.00185469	protein_coding	ENSMUSG00000026672.11	71648
							Prepl	0.561214	0.0457457	protein_coding	ENSMUSG00000024127.14	213760		Tmcc1	-0.611123	0.000513324	protein_coding	ENSMUSG00000030126.17	330401
							Sh3bgrl3	0.558341	0.0321256	protein_coding	ENSMUSG00000028843.8	73723		Mylip	-0.610919	0.00713045	protein_coding	ENSMUSG00000038175.9	218203
							Cdc123	0.556787	0.00590217	protein_coding	ENSMUSG00000039128.13	98828		Dbn1	-0.610657	0.0297776	protein_coding	ENSMUSG00000034675.17	56320
							Dtx3l	0.555696	0.00319586	protein_coding	ENSMUSG00000049502.16	209200		Lrrn4cl	-0.608732	0.00617468	protein_coding	ENSMUSG00000071656.6	68852
							Ivd	0.553883	0.00864839	protein_coding	ENSMUSG00000027332.11	56357		Phospho1	-0.608104	0.0201397	protein_coding	ENSMUSG00000050860.6	237928
							Pitx2	0.553841	0.0216094	protein_coding	ENSMUSG00000028023.16	18741		C2cd2l	-0.607261	0.003714	protein_coding	ENSMUSG00000032120.10	71764
							Got2	0.552261	0.00711297	protein_coding	ENSMUSG00000031672.8	14719		Gpd2	-0.603743	0.00865968	protein_coding	ENSMUSG00000026827.12	14571
							Tm7sf2	0.551964	0.0492642	protein_coding	ENSMUSG00000024799.14	73166		Fmnl2	-0.603643	0.0176321	protein_coding	ENSMUSG00000036053.16	71409
							Fads6	0.550316	0.0361697	protein_coding	ENSMUSG00000044788.10	328035		Lbx1	-0.600247	0.0137383	protein_coding	ENSMUSG00000025216.9	16814
							Exog	0.548638	0.0470743	protein_coding	ENSMUSG00000042787.13	208194		Tenm3	-0.599824	0.0312777	protein_coding	ENSMUSG00000031561.16	23965
							Gca	0.546533	0.0457457	protein_coding	ENSMUSG00000026893.4	227960		Lysmd2	-0.598868	0.0328376	protein_coding	ENSMUSG00000032184.4	70082
							Slc4a3	0.542896	0.0496457	protein_coding	ENSMUSG00000006576.16	20536		Sub1	-0.597954	0.00197333	protein_coding	ENSMUSG00000022205.15	20024
							Pdzd7	0.541695	0.0399634	protein_coding	ENSMUSG00000074818.12	100503041		Spin1	-0.59788	0.00265002	protein_coding	ENSMUSG00000021395.10	20729
							Ddit3	0.541055	0.0129976	protein_coding	ENSMUSG00000025408.15	13198		Vezf1	-0.597048	0.0012575	protein_coding	ENSMUSG00000018377.10	22344
							Ldlrap1	0.540612	0.00254652	protein_coding	ENSMUSG00000037295.7	100017		Gm28229	-0.596177	0.0256666	sense_intronic	ENSMUSG00000101335.1	NA
							Crem	0.537237	0.0057534	protein_coding	ENSMUSG00000063889.16	12916		Pole4	-0.595319	0.0308113	protein_coding	ENSMUSG00000030042.15	66979
							Rnf213	0.536775	0.0101028	protein_coding	ENSMUSG00000070327.14	672511		Tfdp1	-0.595043	0.00156533	protein_coding	ENSMUSG00000038482.11	21781
							Lcmt2	0.534431	0.026774	protein_coding	ENSMUSG00000074890.4	329504		Eef1akmt1	-0.593621	0.0207426	protein_coding	ENSMUSG00000021951.5	68043
							Ppp1r11	0.534382	0.0182005	protein_coding	ENSMUSG00000036398.13	76497		Rab2a	-0.591923	0.00427734	protein_coding	ENSMUSG00000047187.9	59021
							Myom2	0.528551	0.00258222	protein_coding	ENSMUSG00000031461.4	17930		Pctp	-0.591284	0.0324462	protein_coding	ENSMUSG00000020553.8	18559
							Abcg2	0.527788	0.00865825	protein_coding	ENSMUSG00000029802.13	26357		Mical2	-0.590783	0.02844	protein_coding	ENSMUSG00000038244.13	320878
							Gm37314	0.527237	0.00670938	TEC	ENSMUSG00000104094.1	NA		Gatsl2	-0.586385	0.026774	protein_coding	ENSMUSG00000015944.9	80909
							Trim35	0.526132	0.0114821	protein_coding	ENSMUSG00000022043.18	66854		Skil	-0.585391	0.0012575	protein_coding	ENSMUSG00000027660.16	20482
							Rnaseh2c	0.525966	0.0196412	protein_coding	ENSMUSG00000024925.10	68209		Tbkbp1	-0.584751	0.0272329	protein_coding	ENSMUSG00000038517.15	73174
							RP23-425N12.2	0.524502	0.045876	lincRNA	ENSMUSG00000106981.1	NA		Fmr1	-0.583827	0.0492642	protein_coding	ENSMUSG00000000838.17	14265
							F11r	0.523139	0.0111115	protein_coding	ENSMUSG00000038235.4	16456		Fez2	-0.583806	0.00554544	protein_coding	ENSMUSG00000056121.15	225020
							Eci1	0.522587	0.0190388	protein_coding	ENSMUSG00000024132.5	13177		Angptl7	-0.582877	0.0127127	protein_coding	ENSMUSG00000028989.3	654812
							Arl6ip5	0.521007	0.00154333	protein_coding	ENSMUSG00000035199.6	65106		Tmem63a	-0.577684	0.00136824	protein_coding	ENSMUSG00000026519.16	208795
							Ppara	0.520904	0.0330123	protein_coding	ENSMUSG00000022383.13	19013		Cpeb4	-0.57704	0.00176944	protein_coding	ENSMUSG00000020300.14	67579
							Nudt8	0.520796	0.0243458	protein_coding	ENSMUSG00000024869.9	NA		Tada2a	-0.577024	0.0314663	protein_coding	ENSMUSG00000018651.14	217031
							Abi2	0.520226	0.00473156	protein_coding	ENSMUSG00000026782.15	329165		Rxra	-0.57582	0.0012487	protein_coding	ENSMUSG00000015846.14	20181
							Shmt2	0.518384	0.00928323	protein_coding	ENSMUSG00000025403.4	108037		Spire1	-0.57467	0.0190388	protein_coding	ENSMUSG00000024533.15	68166
							Wbp1	0.518332	0.00547733	protein_coding	ENSMUSG00000030035.14	22377		2610203C20Rik	-0.574618	0.00401802	processed_transcript	ENSMUSG00000074415.11	73144
							Usp54	0.518113	0.0452088	protein_coding	ENSMUSG00000034235.16	78787		Phc1	-0.573303	0.029913	protein_coding	ENSMUSG00000040669.14	13619
							Mrpl47	0.515661	0.0241428	protein_coding	ENSMUSG00000037531.8	74600		Slc26a6	-0.573153	0.0212287	protein_coding	ENSMUSG00000023259.16	171429
							Kyat3	0.515188	0.0270302	protein_coding	ENSMUSG00000040213.13	229905		Zfp946	-0.572818	0.0290029	protein_coding	ENSMUSG00000071266.13	74149
							Acss1	0.514551	0.0388939	protein_coding	ENSMUSG00000027452.11	68738		Ankrd6	-0.572688	0.0255471	protein_coding	ENSMUSG00000040183.13	140577
							Dis3	0.513927	0.00431061	protein_coding	ENSMUSG00000033166.10	72662		Setbp1	-0.572216	0.00131348	protein_coding	ENSMUSG00000024548.11	240427
							AA474408	0.512629	0.0294611	TEC	ENSMUSG00000073867.2	NA		Acvr1	-0.571993	0.0142197	protein_coding	ENSMUSG00000026836.15	11477
							Camk2d	0.512324	0.017058	protein_coding	ENSMUSG00000053819.16	108058		Eepd1	-0.571972	0.00186238	protein_coding	ENSMUSG00000036611.5	67484
							Lmo7	0.51185	0.00395361	protein_coding	ENSMUSG00000033060.15	380928		Gm43672	-0.571545	0.0103731	lincRNA	ENSMUSG00000106019.1	NA
							Oxnad1	0.509512	0.00928323	protein_coding	ENSMUSG00000021906.13	218885		Tnnt3	-0.570796	0.0102202	protein_coding	ENSMUSG00000061723.18	21957
							Sars	0.509233	0.00191359	protein_coding	ENSMUSG00000068739.13	20226		Ttc7b	-0.570441	0.0152154	protein_coding	ENSMUSG00000033530.7	104718
							Sec61a2	0.507585	0.00631102	protein_coding	ENSMUSG00000025816.15	57743		Htra1	-0.568767	0.00395361	protein_coding	ENSMUSG00000006205.13	56213
							Parp12	0.506768	0.0114821	protein_coding	ENSMUSG00000038507.6	243771		Fbxl4	-0.56832	0.0161923	protein_coding	ENSMUSG00000040410.14	269514
							Pacsin2	0.505929	0.00797388	protein_coding	ENSMUSG00000016664.14	23970		Tmem123	-0.566999	0.00479813	protein_coding	ENSMUSG00000050912.15	71929
							Kri1	0.505324	0.0408951	protein_coding	ENSMUSG00000035047.9	215194		Hfe2	-0.566629	0.00214051	protein_coding	ENSMUSG00000038403.10	69585
							Ptprd	0.505243	0.0370724	protein_coding	ENSMUSG00000028399.18	19266		Abi3bp	-0.565466	0.00268943	protein_coding	ENSMUSG00000035258.14	320712
							Mdh1	0.50353	0.00715686	protein_coding	ENSMUSG00000020321.15	17449		Osbpl10	-0.565455	0.0464931	protein_coding	ENSMUSG00000040875.12	74486
							Gm20712	0.503337	0.0163202	sense_overlapping	ENSMUSG00000093677.1	NA		Gnptab	-0.563497	0.00108498	protein_coding	ENSMUSG00000035311.16	432486
							Cyb5r1	0.502344	0.00167274	protein_coding	ENSMUSG00000026456.18	72017		Gm15446	-0.562654	0.031888	protein_coding	ENSMUSG00000090015.8	100642166
							Ifitm3	0.501937	0.037072	protein_coding	ENSMUSG00000025492.6	66141		Arl4a	-0.561311	0.00307871	protein_coding	ENSMUSG00000047446.18	11861
							Pfkfb2	0.500009	0.00385105	protein_coding	ENSMUSG00000026409.14	18640		Bpgm	-0.559884	0.000713894	protein_coding	ENSMUSG00000038871.5	12183
														Slc16a9	-0.559266	0.0212243	protein_coding	ENSMUSG00000037762.6	66859
														Inafm2	-0.55822	0.0193329	antisense	ENSMUSG00000074918.4	100043272
														Rassf1	-0.557682	0.0251682	protein_coding	ENSMUSG00000010067.13	56289
														Serinc3	-0.557241	0.0153731	protein_coding	ENSMUSG00000017707.9	26943
														Smad3	-0.556995	0.00831053	protein_coding	ENSMUSG00000032402.12	17127
														Lsp1	-0.554171	0.0144522	protein_coding	ENSMUSG00000018819.10	16985
														Lgals1	-0.552617	0.0248706	protein_coding	ENSMUSG00000068220.5	16852
														Abca6	-0.549127	0.0238236	protein_coding	ENSMUSG00000044749.13	76184
														Eif4ebp2	-0.548963	0.00251967	protein_coding	ENSMUSG00000020091.14	13688
														Cited4	-0.548953	0.0274773	protein_coding	ENSMUSG00000070803.6	56222
														Pip5k1a	-0.548672	0.00255634	protein_coding	ENSMUSG00000028126.16	18720
														Lpar1	-0.547241	0.0267985	protein_coding	ENSMUSG00000038668.14	14745
														Slc16a2	-0.547031	0.02844	protein_coding	ENSMUSG00000033965.10	20502
														Zmiz2	-0.546215	0.0032405	protein_coding	ENSMUSG00000041164.15	52915
														Slc7a8	-0.545601	0.0338642	protein_coding	ENSMUSG00000022180.6	50934
														Amigo1	-0.545066	0.00216978	protein_coding	ENSMUSG00000050947.9	229715
														Mturn	-0.544181	0.0475795	protein_coding	ENSMUSG00000038065.13	68235
														Cd9	-0.543891	0.0238518	protein_coding	ENSMUSG00000030342.8	12527
														Klf13	-0.54364	0.0204931	protein_coding	ENSMUSG00000052040.10	50794
														Thbs2	-0.543567	0.00875199	protein_coding	ENSMUSG00000023885.8	21826
														Kif3c	-0.541623	0.00319586	protein_coding	ENSMUSG00000020668.9	16570
														Relt	-0.541156	0.0253704	protein_coding	ENSMUSG00000008318.10	320100
														Zfp9	-0.537727	0.0125587	protein_coding	ENSMUSG00000072623.6	22750
														RP23-478B10.1	-0.534352	0.0329467	processed_pseudogene	ENSMUSG00000109600.1	NA
														9030617O03Rik	-0.534027	0.00610483	protein_coding	ENSMUSG00000021185.15	217830
														Tnrc18	-0.532426	0.0400856	protein_coding	ENSMUSG00000039477.16	231861
														Stxbp6	-0.532335	0.037902	protein_coding	ENSMUSG00000046314.15	217517
														Slc44a2	-0.531803	0.00207391	protein_coding	ENSMUSG00000057193.7	68682
														Ap1ar	-0.530108	0.00129747	protein_coding	ENSMUSG00000074238.6	211556
														Fzd7	-0.530067	0.0179866	protein_coding	ENSMUSG00000041075.8	14369
														Slc35f5	-0.529794	0.0199349	protein_coding	ENSMUSG00000026342.10	74150
														Qser1	-0.528408	0.00154333	protein_coding	ENSMUSG00000074994.4	99003
														Mfap5	-0.528374	0.0453885	protein_coding	ENSMUSG00000030116.14	50530
														Dlg1	-0.52826	0.00222762	protein_coding	ENSMUSG00000022770.16	13383
														Smyd2	-0.527296	0.0293897	protein_coding	ENSMUSG00000026603.13	226830
														Gm7236	-0.526422	0.0427762	processed_pseudogene	ENSMUSG00000090389.1	NA
														Dcn	-0.525915	0.0161375	protein_coding	ENSMUSG00000019929.15	13179
														Casq1	-0.525612	0.02844	protein_coding	ENSMUSG00000007122.11	12372
														Ccl11	-0.524132	0.00637706	protein_coding	ENSMUSG00000020676.2	20292
														Gm15910	-0.523442	0.0155604	processed_transcript	ENSMUSG00000087480.1	100504616
														Peli2	-0.522922	0.0457457	protein_coding	ENSMUSG00000021846.8	93834
														Itpr1	-0.522351	0.00354159	protein_coding	ENSMUSG00000030102.11	16438
														St8sia5	-0.519834	0.00475404	protein_coding	ENSMUSG00000025425.17	225742
														4930453N24Rik	-0.518854	0.000971842	protein_coding	ENSMUSG00000059920.9	67609
														Aven	-0.515586	0.0380171	protein_coding	ENSMUSG00000003604.14	74268
														Hoxc10	-0.515441	0.00136824	protein_coding	ENSMUSG00000022484.7	209448
														Ccdc134	-0.515069	0.0147806	protein_coding	ENSMUSG00000068114.6	76457
														Klhl31	-0.514712	0.00191524	protein_coding	ENSMUSG00000044938.8	244923
														Vkorc1l1	-0.51321	0.0101567	protein_coding	ENSMUSG00000066735.8	69568
														Prkar2a	-0.512973	0.000870017	protein_coding	ENSMUSG00000032601.13	19087
														Sort1	-0.512922	0.0328662	protein_coding	ENSMUSG00000068747.14	20661
														Spast	-0.510906	0.00114908	protein_coding	ENSMUSG00000024068.6	50850
														Cdkn2aipnl	-0.51023	0.0190158	protein_coding	ENSMUSG00000020392.8	52626
														Ppp2cb	-0.509968	0.00518845	protein_coding	ENSMUSG00000009630.10	19053
														Lingo3	-0.509131	0.0294611	protein_coding	ENSMUSG00000051067.7	237403
														Tmod4	-0.508717	0.00724299	protein_coding	ENSMUSG00000005628.12	50874
														Itfg1	-0.508504	0.00875199	protein_coding	ENSMUSG00000031703.8	71927
														Polm	-0.50767	0.0435802	protein_coding	ENSMUSG00000020474.11	54125
														Dnase1	-0.507395	0.0465149	protein_coding	ENSMUSG00000005980.15	13419
														Fgd4	-0.50709	0.012585	protein_coding	ENSMUSG00000022788.16	224014
														Rab10	-0.5064	0.00111398	protein_coding	ENSMUSG00000020671.8	19325
														Lpin1	-0.506128	0.00277148	protein_coding	ENSMUSG00000020593.14	14245
														Mb21d2	-0.505816	0.0249807	protein_coding	ENSMUSG00000051065.8	239796
														Jak1	-0.505529	0.00203267	protein_coding	ENSMUSG00000028530.14	16451
														Ergic1	-0.504959	0.00478118	protein_coding	ENSMUSG00000001576.14	67458
														Jph1	-0.502594	0.0091378	protein_coding	ENSMUSG00000042686.5	57339
														Bmpr1b	-0.502403	0.0439736	protein_coding	ENSMUSG00000052430.15	12167
														Ube2r2	-0.502254	0.00551599	protein_coding	ENSMUSG00000036241.3	67615
														Ghr	-0.500689	0.00197333	protein_coding	ENSMUSG00000055737.12	14600
