# Supplementary material for: Hypermetabolism in mice carrying a near-complete human chromosome 21
Source: eLife. 2023 May 30;12:e86023. doi: 10.7554/eLife.86023 (PMC10229126; doi:10.7554/eLife.86023)
Supplement: Supplementary file 11. [file elife-86023-supp11.xlsx]

## Sheet: Sheet1
Supplemental File 11.
Atrophy-related genes
Gene Symbol	Log2(FC)	Adj.p-Value	Gene Type	GencodeID	EntrezID
Becn1	-0.243223	0.0567085	protein_coding	ENSMUSG00000035086.13	56208
Capn2	-0.0176016	0.919936	protein_coding	ENSMUSG00000026509.15	12334
Fbxo32	-0.465464	0.00449598	protein_coding	ENSMUSG00000022358.6	67731
Mustn1	0.46106	0.141017	protein_coding	ENSMUSG00000042485.6	66175
Nedd4	-0.0523756	0.62336	protein_coding	ENSMUSG00000032216.14	17999
Psma6	0.0999734	0.543869	protein_coding	ENSMUSG00000021024.14	26443
Psmb2	0.19588	0.209227	protein_coding	ENSMUSG00000028837.8	26445
Trim55	-0.264741	0.0605926	protein_coding	ENSMUSG00000060913.6	381485
Trim63	-0.315053	0.0572317	protein_coding	ENSMUSG00000028834.13	433766
Contractile and Structural genes
Gene Symbol	Log2(FC)	Adj.p-Value	Gene Type	GencodeID	EntrezID
Des	0.0269028	0.886292	protein_coding	ENSMUSG00000026208.9	13346
Dysf	-0.0031508	0.989175	protein_coding	ENSMUSG00000033788.15	26903
Mybpc1	0.343544	0.238712	protein_coding	ENSMUSG00000020061.17	109272
Mybpc2	-0.152282	0.355352	protein_coding	ENSMUSG00000038670.11	233199
Myh1	0.801417	0.087949	protein_coding	ENSMUSG00000056328.14	17879
Myh2	-0.0453433	0.944901	protein_coding	ENSMUSG00000033196.17	17882
Myh3	-0.0196151	0.983096	protein_coding	ENSMUSG00000020908.14	17883
Myh7	0.420326	0.727133	protein_coding	ENSMUSG00000053093.15	140781
Myh7b	0.340433	0.735033	protein_coding	ENSMUSG00000074652.3	668940
Myh8	-0.155334	0.739135	protein_coding	ENSMUSG00000055775.16	17885
Myl1	0.0974988	0.644916	protein_coding	ENSMUSG00000061816.15	17901
Myl3	-0.0159365	0.992836	protein_coding	ENSMUSG00000059741.13	17897
Myl4	-1.21397	0.0328662	protein_coding	ENSMUSG00000061086.12	17896
Mypn	0.0791435	0.4802	protein_coding	ENSMUSG00000020067.7	68802
Tnni2	-0.332309	0.12629	protein_coding	ENSMUSG00000031097.15	21953
Fibrosis and Injury Repair related genes
Gene Symbol	Log2(FC)	Adj.p-Value	Gene Type	GencodeID	EntrezID
Col1a1	-0.409695	0.119563	protein_coding	ENSMUSG00000001506.10	12842
Col1a2	-0.297119	0.0737948	protein_coding	ENSMUSG00000029661.16	12843
Col3a1	-0.0753443	0.806254	protein_coding	ENSMUSG00000026043.18	12825
Col4a1	0.216649	0.62159	protein_coding	ENSMUSG00000031502.11	12826
Col4a2	0.113961	0.770452	protein_coding	ENSMUSG00000031503.13	12827
Col4a3	0.0800787	0.77624	protein_coding	ENSMUSG00000079465.8	12828
Col4a3bp	-0.13381	0.269888	protein_coding	ENSMUSG00000021669.14	68018
Col4a4	0.0236773	0.929124	protein_coding	ENSMUSG00000067158.9	12829
Col4a5	0.0718616	0.77624	protein_coding	ENSMUSG00000031274.16	12830
Col4a6	0.445285	0.474502	protein_coding	ENSMUSG00000031273.16	94216
Col6a1	-0.200527	0.3954	protein_coding	ENSMUSG00000001119.7	12833
Col6a2	-0.301015	0.219087	protein_coding	ENSMUSG00000020241.13	12834
Col6a3	-0.0360837	0.890205	protein_coding	ENSMUSG00000048126.16	12835
Col6a6	0.0987703	0.678395	protein_coding	ENSMUSG00000043719.14	245026
Eln	-0.11095	0.688974	protein_coding	ENSMUSG00000029675.12	13717
Mmp2	-0.23043	0.225623	protein_coding	ENSMUSG00000031740.8	17390
Mmp14	-0.230564	0.533391	protein_coding	ENSMUSG00000000957.9	17387
Scx	-0.239357	0.540576	protein_coding	ENSMUSG00000034161.7	20289
Timp1	-0.527814	0.570428	protein_coding	ENSMUSG00000001131.11	21857
Timp2	-0.467183	0.0395302	protein_coding	ENSMUSG00000017466.9	21858
Muscle Wasting related genes
Gene Symbol	Log2(FC)	Adj.p-Value	Gene Type	GencodeID	EntrezID
Aldh2	0.41799	0.0280327	protein_coding	ENSMUSG00000029455.14	11669
Apc	-0.152055	0.230316	protein_coding	ENSMUSG00000005871.14	11789
Bnip3	0.175925	0.301237	protein_coding	ENSMUSG00000078566.8	12176
Ccl2	0.283883	0.835468	protein_coding	ENSMUSG00000035385.5	20296
Foxo1	0.101	0.466882	protein_coding	ENSMUSG00000044167.6	56458
Il6ra	-0.385688	0.165692	protein_coding	ENSMUSG00000027947.11	16194
Il6st	0.0179781	0.901975	protein_coding	ENSMUSG00000021756.12	16195
Ly6c1	-0.159981	0.67278	protein_coding	ENSMUSG00000079018.10	17067
Map1lc3a	-0.00823715	0.977997	protein_coding	ENSMUSG00000027602.9	66734
Ptprc	-0.0906391	0.867091	protein_coding	ENSMUSG00000026395.16	19264
Rela	-0.0164503	0.940777	protein_coding	ENSMUSG00000024927.7	19697
Xrcc5	0.135289	0.51561	protein_coding	ENSMUSG00000026187.8	22596
Zmpste24	-0.0363441	0.801562	protein_coding	ENSMUSG00000043207.10	230709
