# Supplementary material for: Hypermetabolism in mice carrying a near-complete human chromosome 21
Source: eLife. 2023 May 30;12:e86023. doi: 10.7554/eLife.86023 (PMC10229126; doi:10.7554/eLife.86023)
Supplement: Supplementary file 12. — Eu, euploid; VO2, rate of oxygen consumption; VCO2, rate of carbon dioxide production; RER, respiratory exchange ratio; EE, energy expenditure. [file elife-86023-supp12.xlsx]

## Sheet: Sheet1
Supplemental File 12. Indirect calorimetry analysis in thermoneutral conditions (31°C) after two-week acclimatization period of male (55 weeks of age) Euploid and MAC21 mice fed a high-fat diet (18 weeks on diet).
	Eu	MAC21	P	Eu	MAC21	P	Eu	MAC21	P
High-fat diet (Male)	Ad-libitum (dark cycle)			Ad-libitum (light cycle)			Ad-libitum (24 hr)
N	5	4		5	4		5	4
Body weight (g)							58.1 ± 6.18	36.0 ± 7.39	0.002
Food intake (kcal)							7.67 ± 3.42	8.27 ± 3.87	0.814
VO2 (mL/kg lean mass/h)	3185 ± 120	4182 ± 103	<0.001	2480 ± 103	3134 ± 144	0.007	2833 ± 103	3658 ± 112	<0.001
VCO2 (mL/kg lean mass/h)	2230 ± 91	3017 ± 150	0.002	1766 ± 70	2360 ± 221	0.025	1998 ± 76	2688 ± 183	0.007
RER (VCO2/VO2)	0.70 ± 0.006	0.72 ± 0.024	0.342	0.71 ± 0.007	0.75 ± 0.033	0.245	0.70 ± 0.006	0.73 ± 0.028	0.282
EE (kcal/kg lean mass/h)	14.9 ± 0.57	19.7 ± 0.55	<0.001	11.6 ± 0.48	14.9 ± 0.82	0.009	13.3 ± 0.48	17.3 ± 0.64	0.001
Eu: Euploid; VO2: rate of oxygen consumption; VCO2: rate of carbon dioxide production; RER: respiratory exchange ratio; EE: energy expenditure
