# Supplementary material for: Hypermetabolism in mice carrying a near-complete human chromosome 21
Source: eLife. 2023 May 30;12:e86023. doi: 10.7554/eLife.86023 (PMC10229126; doi:10.7554/eLife.86023)
Supplement: Supplementary file 13. — Eu, euploid; gWAT, gonadal white adipose tissue; iWAT, inguinal white adipose tissue; BAT, brown adipose tissue. [file elife-86023-supp13.xlsx]

## Sheet: Sheet2
Supplemental File 13. Tissue weights of male MAC21 mice and Euploid controls (55 weeks of age) housed at thermoneutrality (31°C) and fed a high-fat diet (18 weeks on diet).
	Eu	MAC21	P
N	5	4
Body weight (g)	60.3 ± 2.85	36.9 ± 3.71	0.001
Gondal fat (gWAT, g)	1.62 ± 0.22	1.07 ± 0.05	0.065
Inguinal fat (iWAT, g)	1.60 ± 0.11	0.58 ± 0.11	<0.001
Liver (g)	3.03 ± 0.33	1.66 ± 0.19	0.013
BAT (g)	0.25 ± 0.02	0.10 ± 0.02	<0.001
Pancreas (g)	0.44 ± 0.02	0.34 ± 0.03	0.015
Eu: Euploid; gWAT: gondal white adipose tissue; iWAT: inguinal white adipose tissue; BAT: brown adipose tissue
