# Supplementary material for: Hypermetabolism in mice carrying a near-complete human chromosome 21
Source: eLife. 2023 May 30;12:e86023. doi: 10.7554/eLife.86023 (PMC10229126; doi:10.7554/eLife.86023)
Supplement: Supplementary file 14. — Lists include: detected human genes and all significantly up- and downregulated mouse genes. [file elife-86023-supp14.xlsx]

## Sheet: HFD - SkM - 31C
Supplemental File 14. Differentially expressed genes (DEGs) in skeletal muscle (high-fat diet, at thermoneutrality, 31°C)
Human genes expressed							Mouse up-regulated genes							Mouse down-regulated genes
Gene Symbol	Log(Fold Change)	Adj.p-Value	Gene Type	GencodeID	EntrezID		Gene Symbol	Log(Fold Change)	Adj.p-Value	Gene Type	GencodeID	EntrezID		Gene Symbol	Log(Fold Change)	Adj.p-Value	Gene Type	GencodeID	EntrezID
SH3BGR	12.102	1.37442e-05	protein_coding	ENSG00000185437.13	6450		Eif3s6-ps2	5.04248	0.0101436	processed_pseudogene	ENSMUSG00000091697.1	NA		Cdh4	-3.28461	0.00779259	protein_coding	ENSMUSG00000000305.12	12561
ATP5J	11.7688	1.07412e-05	protein_coding	ENSG00000154723.12	522		Gm13534	4.81397	0.0288278	processed_pseudogene	ENSMUSG00000053472.3	NA		Shc2	-2.79462	0.0337403	protein_coding	ENSMUSG00000020312.11	216148
AGPAT3	11.0609	1.80927e-05	protein_coding	ENSG00000160216.18	56894		RP23-162M13.9	4.75777	0.0213642	processed_pseudogene	ENSMUSG00000110569.1	NA		Nhs	-2.73085	0.0211188	protein_coding	ENSMUSG00000059493.13	195727
MAP3K7CL	10.8511	0.00182645	protein_coding	ENSG00000156265.15	56911		Dmp1	4.74393	0.0191651	protein_coding	ENSMUSG00000029307.7	13406		Cntnap2	-2.41608	0.019514	protein_coding	ENSMUSG00000039419.17	66797
NDUFV3	10.8222	1.50586e-05	protein_coding	ENSG00000160194.17	4731		Myo1a	4.71065	0.0403268	protein_coding	ENSMUSG00000025401.8	432516		Gdf11	-2.34455	0.000441631	protein_coding	ENSMUSG00000025352.6	NA
USP16	10.5965	1.80927e-05	protein_coding	ENSG00000156256.14	10600		Fut1	4.39293	0.040305	protein_coding	ENSMUSG00000008461.6	14343		Pla2g7	-2.20068	0.00270784	protein_coding	ENSMUSG00000023913.17	27226
ATP5O	10.5552	1.37442e-05	protein_coding	ENSG00000241837.6	539		Ccdc92	3.77071	0.0467118	protein_coding	ENSMUSG00000037979.13	215707		Aurka	-2.10773	0.0288278	protein_coding	ENSMUSG00000027496.15	20878
SON	10.2189	4.8345e-05	protein_coding	ENSG00000159140.18	6651		Mthfd2	3.70422	0.00307863	protein_coding	ENSMUSG00000005667.8	17768		Ctxn3	-1.89971	0.000589744	protein_coding	ENSMUSG00000069372.3	629147
DYRK1A	9.78863	5.37067e-05	protein_coding	ENSG00000157540.19	1859		Slc7a5	3.5754	0.00208754	protein_coding	ENSMUSG00000040010.10	20539		Mss51	-1.80194	0.000720236	protein_coding	ENSMUSG00000021815.3	74843
SOD1	9.72707	5.31713e-05	protein_coding	ENSG00000142168.14	6647		Asns	3.30014	0.00709583	protein_coding	ENSMUSG00000029752.12	27053		Col24a1	-1.76699	0.0229498	protein_coding	ENSMUSG00000028197.4	71355
HLCS	9.69361	2.29163e-05	protein_coding	ENSG00000159267.14	3141		Aldh18a1	2.60439	0.00216167	protein_coding	ENSMUSG00000025007.13	56454		Mib1	-1.69125	0.0016351	protein_coding	ENSMUSG00000024294.13	225164
DIP2A	9.59782	2.0035e-05	protein_coding	ENSG00000160305.17	23181		E2f2	2.34612	0.00368025	protein_coding	ENSMUSG00000018983.9	242705		Ces1d	-1.67365	0.0467118	protein_coding	ENSMUSG00000056973.6	104158
SUMO3	9.59034	7.61361e-05	protein_coding	ENSG00000184900.15	6612		A930003A15Rik	2.29872	0.0288278	protein_coding	ENSMUSG00000075330.3	NA		Aebp1	-1.59644	0.000116105	protein_coding	ENSMUSG00000020473.13	11568
DSCR3	9.48385	2.14302e-05	protein_coding	ENSG00000157538.13	10311		Cpne2	2.19466	0.00116272	protein_coding	ENSMUSG00000034361.10	234577		Gm45123	-1.56362	0.0271423	lincRNA	ENSMUSG00000108322.1	71368
PIGP	9.47748	2.0035e-05	protein_coding	ENSG00000185808.13	51227		Ankrd1	2.01349	0.00103135	protein_coding	ENSMUSG00000024803.8	107765		Nos1	-1.48176	0.0456491	protein_coding	ENSMUSG00000029361.18	18125
GABPA	9.37636	2.4874e-05	protein_coding	ENSG00000154727.10	2551		Aldh1l2	1.82916	0.0451213	protein_coding	ENSMUSG00000020256.14	216188		Wbscr17	-1.47656	0.0177429	protein_coding	ENSMUSG00000034040.16	212996
POFUT2	9.29883	2.29163e-05	protein_coding	ENSG00000186866.16	23275		Atf5	1.82188	0.00124841	protein_coding	ENSMUSG00000038539.15	107503		Col22a1	-1.4643	0.00313395	protein_coding	ENSMUSG00000079022.9	69700
ETS2	9.27973	2.29163e-05	protein_coding	ENSG00000157557.11	2114		Tceal7	1.81104	0.00185092	protein_coding	ENSMUSG00000079428.8	100040972		Sorbs2	-1.42928	0.00198367	protein_coding	ENSMUSG00000031626.17	234214
IFNAR1	9.2289	4.92252e-05	protein_coding	ENSG00000142166.12	3454		Spag5	1.70835	0.0182271	protein_coding	ENSMUSG00000002055.9	54141		2310065F04Rik	-1.38651	0.0291401	lincRNA	ENSMUSG00000087410.7	74184
UBE2G2	9.21672	0.000389341	protein_coding	ENSG00000184787.18	7327		Itga9	1.66313	0.00262616	protein_coding	ENSMUSG00000039115.13	104099		Enox2	-1.34849	0.0133893	protein_coding	ENSMUSG00000031109.16	209224
PTTG1IP	9.13387	0.000233097	protein_coding	ENSG00000183255.11	754		Tnfaip2	1.54731	0.000720236	protein_coding	ENSMUSG00000021281.15	21928		Tpbgl	-1.34506	0.0220167	protein_coding	ENSMUSG00000096606.2	100503386
CCT8	9.12742	7.61361e-05	protein_coding	ENSG00000156261.12	10694		Cdkn1a	1.5176	0.00125006	protein_coding	ENSMUSG00000023067.13	12575		mt-Te	-1.29452	0.0347948	Mt_tRNA	ENSMUSG00000064369.1	NA
BRWD1	9.03218	0.000177388	protein_coding	ENSG00000185658.13	54014		Slc7a1	1.49371	0.019495	protein_coding	ENSMUSG00000041313.14	11987		Mettl11b	-1.25746	0.0274527	protein_coding	ENSMUSG00000040113.14	240879
N6AMT1	9.0304	2.42105e-05	protein_coding	ENSG00000156239.11	29104		Sesn2	1.48532	0.0409152	protein_coding	ENSMUSG00000028893.8	NA		Mstn	-1.24521	0.00126526	protein_coding	ENSMUSG00000026100.6	17700
TRAPPC10	8.97941	2.76737e-05	protein_coding	ENSG00000160218.12	7109		Lrp2bp	1.45392	0.000602503	protein_coding	ENSMUSG00000031637.13	67620		Rasd2	-1.24434	0.00061135	protein_coding	ENSMUSG00000034472.13	75141
IFNGR2	8.94285	2.29163e-05	protein_coding	ENSG00000159128.14	3460		Abra	1.34924	0.0288278	protein_coding	ENSMUSG00000042895.5	NA		Cpeb1	-1.20331	0.00502024	protein_coding	ENSMUSG00000025586.17	12877
MCM3AP	8.8912	0.000127675	protein_coding	ENSG00000160294.10	8888		Otud1	1.32611	0.0458125	protein_coding	ENSMUSG00000043415.5	71198		Clec3b	-1.18971	0.0142333	protein_coding	ENSMUSG00000025784.4	21922
SLC37A1	8.72888	3.38178e-05	protein_coding	ENSG00000160190.13	54020		A930018M24Rik	1.3242	0.0211188	protein_coding	ENSMUSG00000091089.1	NA		Gpx3	-1.1889	0.0352794	protein_coding	ENSMUSG00000018339.11	14778
CLIC6	8.71162	4.70044e-05	protein_coding	ENSG00000159212.12	54102		Ctnna3	1.31978	0.0178576	protein_coding	ENSMUSG00000060843.11	216033		Pmepa1	-1.11598	0.0288278	protein_coding	ENSMUSG00000038400.15	65112
RRP1B	8.68052	5.37067e-05	protein_coding	ENSG00000160208.12	23076		A830010M20Rik	1.30578	0.0106572	protein_coding	ENSMUSG00000044060.18	NA		Smox	-1.10573	0.0255883	protein_coding	ENSMUSG00000027333.18	228608
BACH1	8.53899	3.6467e-05	protein_coding	ENSG00000156273.15	571		Ift122	1.30391	0.00099488	protein_coding	ENSMUSG00000030323.13	81896		Ttll7	-1.09907	0.00356695	protein_coding	ENSMUSG00000036745.15	70892
GART	8.46436	0.000357562	protein_coding	ENSG00000159131.16	2618		6430548M08Rik	1.27333	0.0242505	protein_coding	ENSMUSG00000031824.15	234797		Calm3	-1.09281	0.001189	protein_coding	ENSMUSG00000019370.10	12315
URB1	8.42821	0.000243527	protein_coding	ENSG00000142207.6	9875		Gadd45a	1.25669	0.0254478	protein_coding	ENSMUSG00000036390.8	13197		Myoc	-1.09172	0.0163665	protein_coding	ENSMUSG00000026697.10	17926
RWDD2B	8.41747	4.70044e-05	protein_coding	ENSG00000156253.6	10069		Slc47a1	1.23574	0.0266476	protein_coding	ENSMUSG00000010122.14	67473		Plekho1	-1.09066	0.0211188	protein_coding	ENSMUSG00000015745.9	67220
MX2	8.36788	4.8345e-05	protein_coding	ENSG00000183486.12	4600		Zfp870	1.22697	0.0176758	protein_coding	ENSMUSG00000095325.1	240066		Slc16a3	-1.09018	0.00952621	protein_coding	ENSMUSG00000025161.16	80879
WRB	8.30317	0.000177878	protein_coding	ENSG00000182093.14	7485		Clu	1.16039	0.000441631	protein_coding	ENSMUSG00000022037.14	12759		Me1	-1.04674	0.000777062	protein_coding	ENSMUSG00000032418.15	17436
PKNOX1	8.2998	7.29494e-05	protein_coding	ENSG00000160199.14	5316		Nnt	1.16021	0.000602503	protein_coding	ENSMUSG00000025453.16	18115		Ppp1r14b	-1.00613	0.00903643	protein_coding	ENSMUSG00000056612.6	18938
ITSN1	8.29001	4.70044e-05	protein_coding	ENSG00000205726.14	6453		Angpt1	1.0908	0.00707625	protein_coding	ENSMUSG00000022309.8	11600		Vasp	-0.984869	0.0288278	protein_coding	ENSMUSG00000030403.9	22323
CYYR1	8.28351	4.70044e-05	protein_coding	ENSG00000166265.11	116159		Tmem47	1.08817	0.0490489	protein_coding	ENSMUSG00000025666.16	192216		Plekhb1	-0.955061	0.0225077	protein_coding	ENSMUSG00000030701.17	27276
C21orf33	8.27818	9.85505e-05	protein_coding	ENSG00000160221.16	8209		Camta1	1.05724	0.038797	protein_coding	ENSMUSG00000014592.19	100072		Zfp467	-0.923984	0.0182271	protein_coding	ENSMUSG00000068551.12	68910
MX1	8.25389	0.000100299	protein_coding	ENSG00000157601.13	4599		Rcan1	1.04633	0.0133893	protein_coding	ENSMUSG00000022951.15	54720		Net1	-0.902659	0.00920882	protein_coding	ENSMUSG00000021215.14	56349
CSTB	8.22817	0.000441631	protein_coding	ENSG00000160213.5	1476		Iars	1.02913	0.0288278	protein_coding	ENSMUSG00000037851.13	105148		Sms	-0.877998	0.00237166	protein_coding	ENSMUSG00000071708.11	20603
SLC5A3	8.22368	4.70044e-05	protein_coding	ENSG00000198743.6	6526		Klf10	0.970835	0.0247737	protein_coding	ENSMUSG00000037465.9	21847		Ccnk	-0.876565	0.0127774	protein_coding	ENSMUSG00000021258.9	12454
CH507-9B2.3	8.13959	0.000116105	protein_coding	ENSG00000280071.3	102724023		Cars	0.933623	0.016643	protein_coding	ENSMUSG00000010755.17	27267		Lgals1	-0.821299	0.0211188	protein_coding	ENSMUSG00000068220.5	16852
SYNJ1	8.03346	4.8345e-05	protein_coding	ENSG00000159082.17	8867		Rb1	0.928658	0.0288278	protein_coding	ENSMUSG00000022105.6	19645		Mylk2	-0.808737	0.0016351	protein_coding	ENSMUSG00000027470.9	228785
PDXK	8.01314	0.000889282	protein_coding	ENSG00000160209.18	8566		Pacsin2	0.919236	0.0241124	protein_coding	ENSMUSG00000016664.14	23970		Calm1	-0.805982	0.0176758	protein_coding	ENSMUSG00000001175.13	12313
APP	7.98277	0.00176997	protein_coding	ENSG00000142192.20	351		Extl1	0.865417	0.0214711	protein_coding	ENSMUSG00000028838.11	56219		Rxrg	-0.783547	0.0321345	protein_coding	ENSMUSG00000015843.10	20183
HMGN1	7.90916	0.000844431	protein_coding	ENSG00000205581.10	3150		Clic4	0.84811	0.0198371	protein_coding	ENSMUSG00000037242.8	29876		Drap1	-0.746822	0.0220167	protein_coding	ENSMUSG00000024914.16	66556
PCNT	7.83694	0.000345437	protein_coding	ENSG00000160299.16	5116		Cebpg	0.844338	0.0247737	protein_coding	ENSMUSG00000056216.9	12611		Ankrd9	-0.735063	0.0104122	protein_coding	ENSMUSG00000037904.14	74251
ADAMTS1	7.81562	6.38954e-05	protein_coding	ENSG00000154734.14	9510		Fads6	0.797424	0.0314828	protein_coding	ENSMUSG00000044788.10	NA		Kmt5a	-0.634201	0.0312841	protein_coding	ENSMUSG00000049327.17	67956
MRPL39	7.81286	0.000127811	protein_coding	ENSG00000154719.13	54148		Prss23	0.786484	0.0257448	protein_coding	ENSMUSG00000039405.7	76453		Ccdc50	-0.606851	0.0401548	protein_coding	ENSMUSG00000038127.14	67501
PSMG1	7.81204	0.000193776	protein_coding	ENSG00000183527.11	8624		Gars	0.760247	0.0399112	protein_coding	ENSMUSG00000029777.10	353172		Ttc7b	-0.56578	0.0497219	protein_coding	ENSMUSG00000033530.7	104718
SETD4	7.79893	0.000100299	protein_coding	ENSG00000185917.13	54093		Lmod3	0.738804	0.00758045	protein_coding	ENSMUSG00000044086.8	320502		Cdc34	-0.551444	0.0467118	protein_coding	ENSMUSG00000020307.14	216150
CBR1	7.78961	0.00016925	protein_coding	ENSG00000159228.12	873		Sars	0.725461	0.0314828	protein_coding	ENSMUSG00000068739.13	20226		Csde1	-0.526913	0.0343001	protein_coding	ENSMUSG00000068823.10	229663
URB1-AS1	7.76866	7.72165e-05	lincRNA	ENSG00000256073.3	84996		Palld	0.66369	0.016643	protein_coding	ENSMUSG00000058056.16	72333
TMEM50B	7.75257	0.00126526	protein_coding	ENSG00000142188.16	757		Yars	0.651532	0.0372991	protein_coding	ENSMUSG00000028811.11	NA
CRYZL1	7.68027	0.000310053	protein_coding	ENSG00000205758.11	9946		Tob1	0.616456	0.040305	protein_coding	ENSMUSG00000037573.5	22057
TTC3	7.66683	0.0020249	protein_coding	ENSG00000182670.13	7267		Nars	0.600864	0.0353099	protein_coding	ENSMUSG00000024587.9	70223
RRP1	7.58475	0.000127675	protein_coding	ENSG00000160214.12	8568		Dmpk	0.572789	0.0225077	protein_coding	ENSMUSG00000030409.15	13400
PRMT2	7.52967	0.000505909	protein_coding	ENSG00000160310.16	3275
RUNX1	7.48822	0.000193396	protein_coding	ENSG00000159216.18	861
TSPEAR-AS1	7.48611	0.000296301	antisense	ENSG00000235890.2	NA
LINC00649	7.47188	0.000720236	antisense	ENSG00000237945.7	100506334
FAM207A	7.45711	0.000167233	protein_coding	ENSG00000160256.12	85395
PAXBP1	7.44083	0.00143088	protein_coding	ENSG00000159086.14	94104
MRPS6	7.38664	0.000193776	protein_coding	ENSG00000243927.5	64968
BACE2	7.36065	0.000116105	protein_coding	ENSG00000182240.15	25825
IFNAR2	7.35589	0.000150515	protein_coding	ENSG00000159110.19	3455
PRDM15	7.34274	0.000127675	protein_coding	ENSG00000141956.13	63977
JAM2	7.28676	0.00031633	protein_coding	ENSG00000154721.14	58494
CH507-9B2.5	7.28307	0.000174255	protein_coding	ENSG00000275464.4	102724159
C21orf59	7.24906	0.000147611	protein_coding	ENSG00000159079.18	56683
ADARB1	7.19587	0.000180377	protein_coding	ENSG00000197381.15	104
S100B	7.19575	0.000196837	protein_coding	ENSG00000160307.9	6285
BTG3	7.15544	0.0182367	protein_coding	ENSG00000154640.14	10950
SCAF4	7.1483	0.0020249	protein_coding	ENSG00000156304.14	57466
TSPEAR-AS2	7.12022	0.000173271	antisense	ENSG00000182912.6	NA
LTN1	7.08767	0.000173271	protein_coding	ENSG00000198862.13	26046
DNAJC28	6.86986	0.000361813	protein_coding	ENSG00000177692.11	54943
HSPA13	6.78335	0.000615809	protein_coding	ENSG00000155304.5	6782
C2CD2	6.70855	0.00151997	protein_coding	ENSG00000157617.16	25966
CHAF1B	6.61164	0.000506353	protein_coding	ENSG00000159259.7	8208
DONSON	6.55832	0.000775487	protein_coding	ENSG00000159147.17	29980
ITGB2	6.41579	0.00126526	protein_coding	ENSG00000160255.17	3689
ZBTB21	6.26525	0.00851285	protein_coding	ENSG00000173276.13	49854
SIM2	6.2407	0.000715817	protein_coding	ENSG00000159263.15	6493
WDR4	6.21051	0.00203842	protein_coding	ENSG00000160193.11	10785
LINC00310	6.12782	0.00123567	lincRNA	ENSG00000227456.7	114036
UMODL1	6.10243	0.00251181	protein_coding	ENSG00000177398.18	89766
PFKL	6.09431	0.00947637	protein_coding	ENSG00000141959.16	5211
TIAM1	6.08866	0.00125006	protein_coding	ENSG00000156299.13	7074
IL10RB	6.03681	0.00125006	protein_coding	ENSG00000243646.9	3588
C21orf58	5.95374	0.00125006	protein_coding	ENSG00000160298.17	54058
RCAN1	5.93474	0.00208754	protein_coding	ENSG00000159200.17	1827
DOPEY2	5.91231	0.00491192	protein_coding	ENSG00000142197.12	9980
EVA1C	5.76935	0.00232256	protein_coding	ENSG00000166979.12	59271
CBSL	5.65651	0.0148382	protein_coding	ENSG00000274276.4	102724560
U2AF1	5.60367	0.00379279	protein_coding	ENSG00000160201.11	7307
LCA5L	5.35918	0.00623307	protein_coding	ENSG00000157578.13	150082
LINC00205	5.14345	0.0119805	lincRNA	ENSG00000223768.1	NA
BX322557.10	5.13846	0.0142798	processed_transcript	ENSG00000215447.7	NA
KCNE2	5.12129	0.0118028	protein_coding	ENSG00000159197.3	9992
TSPEAR	5.06344	0.0314828	protein_coding	ENSG00000175894.14	54084
CBS	5.03411	0.029469	protein_coding	ENSG00000160200.17	875
MORC3	5.01563	0.0403268	protein_coding	ENSG00000159256.12	23515
DSCR4	4.96093	0.0182271	protein_coding	ENSG00000184029.9	10281
PAXBP1-AS1	4.9249	0.0142798	antisense	ENSG00000238197.5	100506215
LINC01436	4.76575	0.0302674	lincRNA	ENSG00000231106.2	NA
RSPH1	4.76538	0.0318669	protein_coding	ENSG00000160188.9	89765
YBEY	4.46126	0.0403268	protein_coding	ENSG00000182362.13	54059
