# Supplementary material for: Hypermetabolism in mice carrying a near-complete human chromosome 21
Source: eLife. 2023 May 30;12:e86023. doi: 10.7554/eLife.86023 (PMC10229126; doi:10.7554/eLife.86023)
Supplement: Supplementary file 15. [file elife-86023-supp15.xlsx]

## Sheet: Sheet1
Supplemental File 15. List of primers used for qPCR analysis of gene expression.
Gene Symbol	Gene Name	Forward Sequence	Reverse Sequence
Acadm, Mcad	Acyl-Coenzyme A dehydrogenase, medium chain	AGGGTTTAGTTTTGAGTTGACGG	CCCCGCTTTTGTCATATTCCG
Acc	Acetyl-CoA carboxylase	TGACAGACTGATCGCAGAGAAAG	TGGAGAGCCCCACACACA
Acox1	Acyl-Coenzyme A oxidase 1, palmitoyl	AGATTGGTAGAAATTGCTGCAAA	ACGCCACTTCCTTGCTCTTC
Adgre1, F4/80	Adhesion G protein-coupled receptor E1	CCCCAGTGTCCTTACAGAGTG	GTGCCCAGAGTGGATGTCT
Arg1	Arginase 1	CTCCAAGCCAAAGTCCTTAGAG	AGGAGCTGTCATTAGGGACATC
Atp2a1	ATPase, Ca2+ transporting, fast twitch 1, Serca1	TGTTTGTCCTATTTCGGGGTG	AATCCGCACAAGCAGGTCTTC
Atp2a2	ATPase C2+ transporting slow twitch 2, Serca2a	GAGAACGCTCACACAAAGACC	CAATTCGTTGGAGCCCCAT
Atp5a1	ATP synthase, H+ transporting, mitochondrial F1 complex, alpha subunit 1	TCTCCATGCCTCTAACACTCG	CCAGGTCAACAGACGTGTCAG
Calm2	Calmodulin 2	ACGGGGATGGGACAATAACAA	CACACGGAATGCTTCTCTAATCT
Ccl3	Chemokine (C-C motif) ligand 3	TTCTCTGTACCATGACACTCTGC	CGTGGAATCTTCCGGCTGTAG
Ccl4	Chemokine (C-C motif) ligand 4	TTCCTGCTGTTTCTCTTACACCT	CTGTCTGCCTCTTTTGGTCAG
Ccr7	Chemokine (C-C motif) receptor 7	TGTACGAGTCGGTGTGCTTC	GGTAGGTATCCGTCATGGTCTTG
CD206	Mannose receptor, C type 1	CTCTGTTCAGCTATTGGACGC	CGGAATTTCTGGGATTCAGCTTC
CD36	CD36 molecule	ATGGGCTGTGATCGGAACTG	AGCCAGGACTGCACCAATAAC
CD68	CD68 antigen	TTCTGCTGTGGAAATGCAAG	CAATGATGAGAGGCAGCAAG
Cebpa	CCAAT/enhancer binding protein alpha	CAAGAACAGCAACGAGTACCG	GTCACTGGTCAACTCCAGCAC
Cidea	Cell death-inducing DNA fragmentation factor, alpha subunit-like effector A	TGACATTCATGGGATTGCAGAC	GGCCAGTTGTGATGACTAAGAC
Cidec	Cell death-inducing DFFA-like effector c	ATGGACTACGCCATGAAGTCT	CGGTGCTAACACGACAGGG
Ckb	Brain/BAT isoform fo CK	AGTTCCCTGATCTGAGCAGC	GAATGGCGTCGTCCAAAGTAA
Ckm	Creatine kinase, muscle	CTGACCCCTGACCTCTACAAT	CATGGCGGTCCTGGATGAT
Col1a1	Collagen, type I, alpha 1	GCTCCTCTTAGGGGCCACT	CCACGTCTCACCATTGGGG
Col3a1	Collagen, type III, alpha 1	GGGTTTCCCTGGTCCTAAAG	CCTGGTTTCCCATTTTCTCC
Col6a1	Collagen, type VI, alpha 1	GATGAGGGTGAAGTGGGAGA	CAGCACGAAGAGGATGTCAA
Cox8b	Cytochrome c oxidase subunit 8B	TGTGGGGATCTCAGCCATAGT	AGTGGGCTAAGACCCATCCTG
Cpt1a	Carnitine palmitoyltransferase 1a, liver	CACCAACGGGCTCATCTTCTA	CAAAATGACCTAGCCTTCTATCGAA
Cpt1b	Carnitine palmitoyltransferase 1b, muscle	GGTCCCATAAGAAACAAGACCTCC	CAGAAAGTACCTCAGCCAGGAAAG
Dgat1	Diacylglycerol O-acyltransferase 1	GCCTTACTGGTTGAGTCTATCAC	GCACCACAGGTTGACATCC
Dgat2	Diacylglycerol O-acyltransferase 2	GCGCTACTTCCGAGACTACTT	GGGCCTTATGCCAGGAAACT
Dio2	Deiodinase, iodothyronine, type II	AATTATGCCTCGGAGAAGACCG	GGCAGTTGCCTAGTGAAAGGT
Dio3	Deiodinase, iodothyronine type III	CACGGCCTTCATGCTCTGG	CGGTTGTCGTCTGATACGCA
F4/80	Adhesion G protein-coupled receptor E1	CCCCAGTGTCCTTACAGAGTG	GTGCCCAGAGTGGATGTCT
Fasn	Fatty acid synthase	GGAGGTGGTGATAGCCGGTAT	TGGGTAATCCATAGAGCCCAG
Gatm	Glycine amidinotransferase (L-arginine:Gglycine amidotransferase), mitochondrial protein nuclear encoded	GCTTCCTCCCGAAATTCCTGT	CCTCTAAAGGGTCCCATTCGT
Gpat1, Gpam	Glycerol-3-phosphate acyltransferase, mitochondrial	CATCCTCTTTTGCCACAACAT	ACAGAATGTCTTTGCGTCCA
Gpat2	Glycerol-3-phosphate acyltransferase 2, mitochondrial	CACTGCTCCAGGTTTTGATG	AGGTTGGCAGCAATTCCATAC
Gpat4	Glycerol-3-phosphate acyltransferase 4	AGCTTGATTGTCAACCTCCTG	CCGTTGGTGTAGGGCTTGT
Hnf4a	Hepatic nuclear factor 4, alpha	CACGCGGAGGTCAAGCTAC	CCCAGAGATGGGAGAGGTGAT
Il-10	Interleukin 10	TAGTCCTTCCTACCCCAATTTCC	TTGGTCCTTAGCCACTCCTTC
Il-1β	Interleukin 1 beta	GCTCTTACTGACTGGCATGAG	CGCAGCTCTAGGAGCATGTG
IL6	Interleukin 6	GCCACCTTTTGACAGTGATGAG	GACAGCCCAGGTCAAAGGTT
Lcad, Acadl	Acyl-Coenzyme A dehydrogenase, long-chain	TCTTTTCCTCGGAGCATGACA	GACCTCTCTACTCACTTCTCCAG
Lipe	Lipase, hormone sensitive	CCAGCCTGAGGGCTTACTG	CTCCATTGACTGTGACATCTCG
Mb	Myoglobin	CTGTTTAAGACTCACCCTGAGAC	GGTGCAACCATGCTTCTTCA
Mcad	Acyl-Coenzyme A dehydrogenase, medium chain	AGGGTTTAGTTTTGAGTTGACGG	CCCCGCTTTTGTCATATTCCG
Mcp1	chemokine (C-C motif) ligand 2	TTAAAAACCTGGATCGGAACCAA	GCATTAGCTTCAGATTTACGGGT
Mct10	Slc16a10, olute carrier family 16, member 10; Tat1	GAGGTGGAGCTGACGAGGT	CATGGACACGAAGAGCACCC
Mct8	Slc16a2, monocarboxylic acid transporter, member 2, Xpct	CGGCTGGATAGTGGTGTTTG	CAGAGTTATGGATGCCGAAGATG
Mgl2	Macrophage galactose N-acetyl-galactosamine specific lectin 2	GCATGAAGGCAGCTGCTATTGGTT	TAGGCCCATCCAGCTAAGCACATT
Mlxipl, ChREBP	MLX interacting protein-like	AGATGGAGAACCGACGTATCA	ACTGAGCGTGCTGACAAGTC
mt-Co2	Mitochondrial cytochrome c oxidase II	GCCGACTAAATCAAGCAACA	CAATGGGCATAAAGCTATGG
mt-Cytb	Mitochondrially encoded cytochrome b	CATTTATTATCGCGGCCCTA	TGTTGGGTTGTTTGATCCTG
myh1	Myosin heavy chain 2x, myosin 1	GCGAATCGAGGCTCAGAACAA	GTAGTTCCGCCTTCGGTCTTG
myh2	Myosin heavy chain 2a, myosin 2	AAGTGACTGTGAAAACAGAAGCA	GCAGCCATTTGTAAGGGTTGAC
Myh4, MyhII2b	Myosin, heavy polypeptide 4, skeletal muscle	CTTTGCTTACGTCAGTCAAGGT	AGCGCCTGTGAGCTTGTAAA
Myh7	Myosin hevy chain polypeptide 7	ACTGTCAACACTAAGAGGGTCA	TTGGATGATTTGATCTTCCAGGG
Myl2	Myosin light poplypeptide 2	ATCGACAAGAATGACCTAAGGGA	ATTTTTCACGTTCACTCGTCCT
Myod1	Myogenic differentiation 1	CCACTCCGGGACATAGACTTG	AAAAGCGCAGGTCTGGTGAG
Myog	Myogenin	GAGACATCCCCCTATTTCTACCA	GCTCAGTCCGCTCATAGCC
Ndufa1	NADH:ubiquinone oxidoreductase subunit A1	ATGTGGTTCGAGATTCTCCCT	TGGTACTGAACACGAGCAACT
Nos2	Nitric oxide synthase 2, inducible	GTTCTCAGCCCAACAATACAAGA	GTGGACGGGTCGATGTCAC
Nr1h4, Fxr	Nuclear receptor subfamily 1, group H, member 4	GCTTGATGTGCTACAAAAGCTG	CGTGGTGATGGTTGAATGTCC
P2rx5	Purinergic receptor P2X, ligand-gated ion channel, 5	TGGAAGGGGTTCGTGTTGTC	AGGGAAGTGTCAATGTCCTGA
Pln	Phospholamban	CTCGCTCGGCTATCAGGAGAG	AGCATCACAATGATGCAGATCAG
Pnpla2, Atgl	Patatin-like phospholipase domain containing 2	TGTGGCCTCATTCCTCCTAC	TCGTGGATGTTGGTGGAGCT
Ppara	Peroxisome proliferator activated receptor alpha	CTATAATTTGCTGTGGAGATCGGC	GGATGGTTGCTCTGCAGGT
Ppard	Peroxisome proliferator activated receptor delta	TCCATCGTCAACAAAGACGGG	ACTTGGGCTCAATGATGTCAC
Ppargc1a, Pgc1a	Peroxisome proliferative activated receptor, gamma, coactivator 1 alpha	TATGGAGTGACATAGAGTGTGCT	CCACTTCAATCCACCCAGAAAG
Ppargc1b, Pgc1b	Peroxisome proliferative activated receptor, gamma, coactivator 1 beta	TCCTGTAAAAGCCCGGAGTAT	GCTCTGGTAGGGGCAGTGA
Ppar𝛾	Peroxisome proliferator activated receptor gamma	TCGCTGATGCACTGCCTATG	GAGAGGTCCACAGAGCTGATT
Prdm16	PR domain containing 16	CAGCACGGTGAAGCCATTC	GCGTGCATCCGCTTGTG
Ptgs2, Cox2 (COXII)	Prostaglandin-endoperoxide synthase 2	GCCGACTAAATCAAGCAACA	CAATGGGCATAAAGCTATGG
Retnla	Resistin like alpha	CCAATCCAGCTAACTATCCCTCC	ACCCAGTAGCAGTCATCCCA
Rplp0, 36B4	Ribosomal protein, large, P0	AGATTCGGGATATGCTGTTGGC	TCGGGTCCTAGACCAGTGTTC
Scd1	Stearoyl-Coenzyme A desaturase 1	TTCTTGCGATACACTCTGGTGC	CGGGATTGAATGTTCTTGTCGT
Sirt1	Sirtuin 1	GCTGACGACTTCGACGACG	TCGGTCAACAGGAGGTTGTCT
Slc6a8	Solute carrier family 6 (neurotransmitter transporter, creatine), member 8	GCAGGGTGTGCATATCTCCAA	TACCCCCACTCACATCAGTCA
Sln	Sarcolipin	TGTGCCCCTGCTCCTCTTC	TGATTGCACACCAAGGCTTG
Srebf1, Srebp1c	Sterol regulatory element binding transcription factor 1	GGAGCCATGGATTGCACATT	GGCCCGGGAAGTCACTGT
Srebf2	Sterol regulatory element binding factor 2	GCGTTCTGGAGACCATGGA	ACAAAGTTGCTCTGAAAACAAATCA
Tbp	TATA-box binding protein	TGGTGTGCACAGGAGCCAAG	TTCACATCACAGCTCCCCAC
Thra1	Thyroid hormone receptor alpha, nr1a1	CTGACCTCCGCATGATCGG	GGTGGGGCACTCGACTTTC
Thrb	Thyroid hormone receptor beta	CCAGAGGTACACGAAGTGTGC	AGGTTTCCAGGGTAACTACAGG
Tnfa	tumor necrosis factor alpha	ATGCTGGGACAGTGACCTGG	CCTTGATGGTGGTGCATGAG
Tnnc1	Troponin C	GCGGTAGAACAGTTGACAGAG	CCAGCTCCTTGGTGCTGAT
Tnni1	Troponin I, skeletal, slow 1	ATGCCGGAAGTTGAGAGGAAA	TCCGAGAGGTAACGCACCTT
Tnnt1	Troponin T1	CCTGTGGTGCCTCCTTTGATT	TGCGGTCTTTTAGTGCAATGAG
Tnnt2	Troponin T2	GAGCTACAGACTCTGATCGAGG	CCGCTCATTGCGAATACGC
Tpm3	Tropomyosin 3, gamma	ACCACCATCGAGGCGGTAA	CCCTTTCCTCCGCATCATCA
Ucp1	Uncoupling protein 1 (mitochondrial, proton carrier)	AGGCTTCCAGTACCATTAGGT	CTGAGTGAGGCAAAGCTGATTT
Ucp3	Uncoupling protein 3 (mitochondrial, proton carrier)	CCGATTTCAAGCCATGATACGC	GGCATCCATAGTCCCTCTGTATT
